# Supplementary material for: Excess hydrogen sulfide and polysulfides production underlies a schizophrenia pathophysiology
Source: PubMed Central journal article supplement (PMC6895609; doi:10.15252/emmm.201910695), 2019-10-28
Supplement: EMMM-11-e10695-s001.pdf [file EMMM-11-e10695-s001.pdf]

## Excess hydrogen sulfide and polysulfides production underlies a schizophrenia pathophysiology

Masayuki Ide<sup>1,2,†</sup>, Tetsuo Ohnishi<sup>1,†</sup>, Manabu Toyoshima<sup>1</sup>, Shabeesh Balan<sup>1</sup>, Motoko Maekawa<sup>1</sup>, Chie Shimamoto-Mitsuyama<sup>1</sup>, Yoshimi Iwayama<sup>1,3</sup>, Hisako Ohba<sup>1</sup>, Akiko Watanabe<sup>1</sup>, Takashi Ishii<sup>4</sup>, Norihiro Shibuya<sup>5,6</sup>, Yuka Kimura<sup>5,6</sup>, Yasuko Hisano<sup>1</sup>, Yui Murata<sup>7</sup>, Tomonori Hara<sup>1,8</sup>, Momo Morikawa<sup>9</sup>, Kenji Hashimoto<sup>10</sup>, Yayoi Nozaki<sup>1</sup>, Tomoko Toyota<sup>1</sup>, Yuina Wada<sup>1,11</sup>, Yosuke Tanaka<sup>9</sup>, Tadamasa Kato<sup>12</sup>, Shigeyoshi Fujisawa<sup>13</sup>, Hideyuki Okano<sup>14</sup>, Masanari Itokawa<sup>15</sup>, Nobutaka Hirokawa<sup>9</sup>, Yasuto Kunii<sup>16,17</sup>, Akiyoshi Kakita<sup>18</sup>, Hirooki Yabe<sup>16</sup>, Kazuya Iwamoto<sup>6</sup>, Kohji Meno<sup>3</sup>, Takuya Katagiri<sup>19</sup>, Brian Dean<sup>20,21</sup>, Kazuhiko Uchida<sup>22</sup>, Hideo Kimura<sup>4,5</sup> & Takeo Yoshikawa<sup>1\*</sup>

<sup>1</sup> Laboratory of Molecular Psychiatry, RIKEN Center for Brain Science, Wako 351-0198, Japan

<sup>2</sup> Department of Psychiatry, Division of Clinical Medicine, Faculty of Medicine, University of Tsukuba, Tsukuba 305-8575, Japan

<sup>3</sup> Support Unit for Bio-Material Analysis, Research Division, RIKEN Center for Brain Science, Wako 351-0198, Japan

<sup>4</sup> Research & Development Department, MCBI Inc, Tsukuba 305-0031, Japan

<sup>5</sup> Department of Pharmacology, Sanyo-Onoda City University, Sanyo-Onoda 756-0884, Japan

<sup>6</sup> Department of Molecular Pharmacology, National Institute of Neuroscience, National Center of Neurology and Psychiatry (NCNP), Kodaira 187-8502, Japan

<sup>7</sup> Department of Molecular Brain Science, Graduate School of Medical Sciences, Kumamoto University, Kumamoto 860-0811, Japan

<sup>8</sup> Department of Organ Anatomy, Tohoku University Graduate School of Medicine, Sendai 980-8575, Japan

<sup>9</sup> Department of Cell Biology and Anatomy, Graduate School of Medicine, The University of Tokyo, Tokyo 113-0033, Japan.

<sup>10</sup> Division of Clinical Neuroscience, Chiba University Center for Forensic Mental Health, Chiba 260-8670, Japan

<sup>11</sup> Ochanomizu University, Graduate School of Humanities and Sciences, Tokyo 112-8610, Japan

<sup>12</sup> Laboratory for Molecular Dynamics of Mental Disorders, RIKEN Brain Science Institute, Wako 351-0198, Japan

<sup>13</sup> Laboratory for Systems Neurophysiology, RIKEN Center for Brain Science, Wako 351-0198, Japan

<sup>14</sup> Department of Physiology, Keio University School of Medicine, Tokyo 160-0016, Japan

<sup>15</sup> Center for Medical Cooperation, Tokyo Metropolitan Institute of Medical Science, Tokyo 156-8506, Japan

<sup>16</sup> Department of Neuropsychiatry, School of Medicine, Fukushima Medical University, Fukushima 960-1247, Japan

<sup>17</sup> Department of Psychiatry, Aizu Medical Center, School of Medicine, Fukushima Medical University, Aizuwakamatsu 969-3492, Japan

<sup>18</sup> Department of Pathology, Brain Research Institute, Niigata University 951-8122, Niigata, Japan

<sup>19</sup> Department of Pharmacy, Faculty of Pharmacy, Iryo Sosei University, Iwaki 970-8551, Japan

<sup>20</sup> The Florey Institute of Neuroscience and Mental Health, Howard Florey Laboratories, The University of Melbourne, Parkville, Victoria 3052, Australia

<sup>21</sup> The Centre for Mental Health, Swinburne University, Hawthorn, Victoria 3122, Australia

<sup>22</sup> Department of Molecular Oncology, Division of Biomedical Science, Faculty of Medicine, University of Tsukuba, Tsukuba 305-8575, Japan

<sup>†</sup> These authors contributed equally to this work.

\*Corresponding author:

Takeo Yoshikawa, MD, PhD

Laboratory for Molecular Psychiatry

RIKEN Center for Brain Science

2-1 Hirosawa, Wako-city, Saitama 351-0198, Japan

Tel: +81(Japan)-48-467-5968; Fax: +81(Japan)-48-467-7462

E-mail: [takeo.yoshikawa@riken.jp](mailto:takeo.yoshikawa@riken.jp)

## **Appendix Figures:**

**Appendix Figure S1:** Biosynthesis of hydrogen sulfide, polysulfide and bound sulfane sulfur species

**Appendix Figure S2:** The structures of genes corresponding to proteins identified by proteomics

**Appendix Figure S3:** Purification of recombinant MPST proteins

**Appendix Figure S4:** Production of hydrogen sulfide from acid-labile sulfur and bound sulfane sulfur

**Appendix Figure S5:** Generation of *Mpst* KO mice

**Appendix Figure S6:** Generation of *Mpst* transgenic mice

**Appendix Figure S7:** No confounding factors affect the expression level of the *MPST* transcripts in postmortem brain samples

**Appendix Figure S8:** Global protein S-palmitoylation was not affected by a genetic ablation of the *Mpst* gene

**Appendix Figure S9:** S-palmitoylation on specific proteins was not affected by a genetic ablation of the *Mpst* gene

**Appendix Figure S10:** Global protein S-palmitoylation was not affected by overexpression of the *Mpst* protein

**Appendix Figure S11:** S-palmitoylation on specific proteins was not affected by overexpression of the *Mpst* protein

**Appendix Figure S12:** Three variants of the mouse *Mpst* gene and polymorphic region between the two inbred strains B6 and C3H

**Appendix Figure S13:** Two CpG islands at the mouse *Mpst* locus

**Appendix Figure S14:** Comparison of the methylation levels between B6 and C3H

**Appendix Figure S15:** Two CpG islands at the human *MPST* locus

**Appendix Figure S16:** CpG island at the human *CBS* locus

**Appendix Figure S17:** The methylation levels of the *CBS* locus in the postmortem brain from schizophrenia patients

**Appendix Figure S18:** The methylation levels of the *CBS* locus in neurosphere differentiated from schizophrenia patient-specific iPSC

**Appendix Figure S19:** Oxidative stress and hydrogen sulfide

**Appendix Figure S20:** No upregulation of typical inflammatory gene expression in offspring from the poly – I: C-treated dams

## **Appendix tables:**

**Appendix Table S1.** Experimental design for 2D-DIGE

**Appendix Table S2.** Differentially expressed proteins between B6 and C3H mice analyzed by 2D-DIGE

**Appendix Table S3.**List of identified proteins showing similar alteration

**Appendix Table S4.** Identification of proteins showing consistent increases and decreases between brain and lymphocytes derived from B6 and C3H mice by 2D-DIGE

**Appendix Table S5.** Genetic variations detected in the coding regions of proteins expressed differentially between B6 and C3H mice.

**Appendix Table S6.** Enzymatic activity of Mpst from B6 and C3H mouse brains

**Appendix Table S7.** Demographic characteristics of postmortem brains (1st set).

**Appendix Table S8.** Demographic characteristics of postmortem brains (2nd set)

**Appendix Table S9.**Demographic characteristics of peripheral blood sample set for *MPST* / *MPST* expression analyses

**Appendix Table S10.** Demographic characteristics of hair follicle sample set.

**Appendix Table S11.** Differentially expressed genes from the frontal cortex of *Mpst* KO mouse

**Appendix Table S12.** Gene ontology enrichment analysis of differentially expressed genes in the frontal cortex of *Mpst* KO and *Mpst* Tg mouse strains

**Appendix Table S13.** Differentially expressed genes from the frontal cortex of *Mpst* Tg mouse

**Appendix Table S14.** Canonical pathways enriched for dysregulated genes in the frontal cortex of *Mpst* KO and *Mpst* Tg mice

**Appendix Table S15.** Results of genomic quantitative PCR for *Mpst*

**Appendix Table S16.** Genetic association analyses of *MPST* and *CBS* with schizophrenia

**Appendix Table S17.** Primer sequences used for DNA methylation analysis and PCR product length

## Synthetic pathway of H<sub>2</sub>S *in vivo*

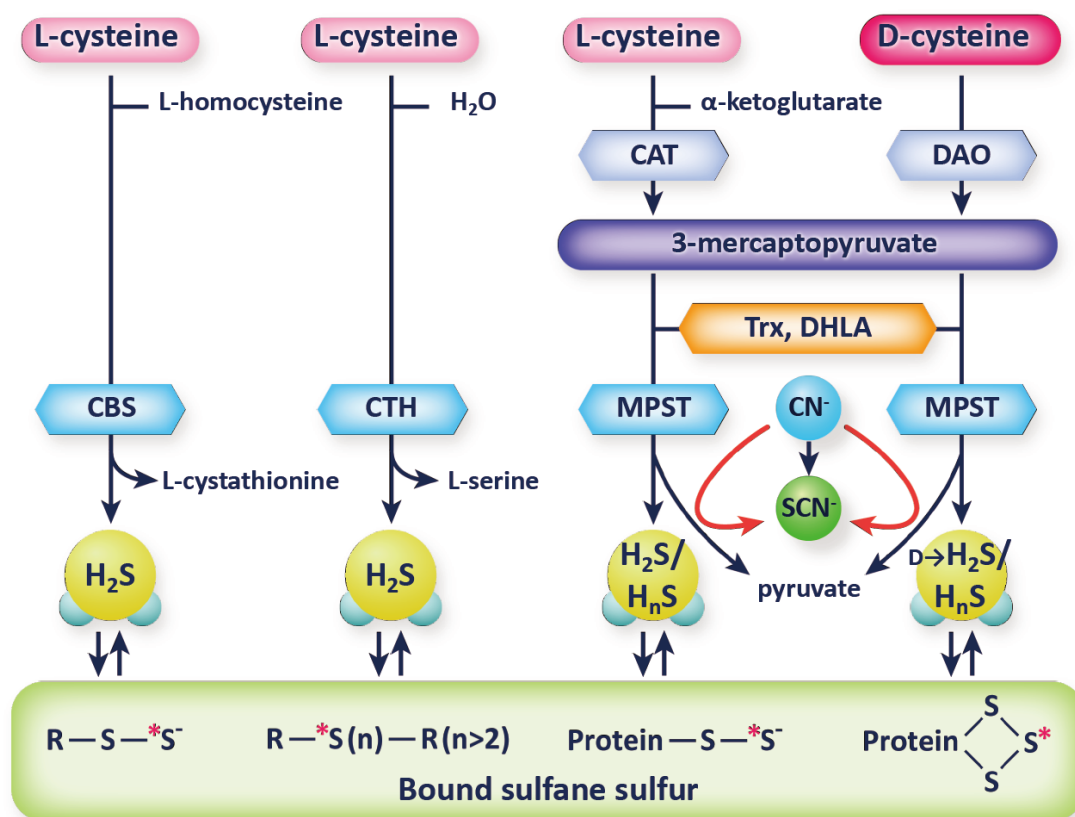

**Appendix Figure S1. Biosynthesis of hydrogen sulfide, polysulfide and bound sulfane sulfur species.** The three enzymes CBS, CTH and MPST mediate generation of hydrogen sulfide and bound sulfane sulfur *in vivo*. Asterisks indicate sulfane sulfur atoms. CBS; cystathionine β-synthase, CTH; cystathionine γ-lyase, MPST; 3-mercaptopyruvate sulfurtransferase, Trx; thioredoxine, DHLA; dihydrolipoic acid.

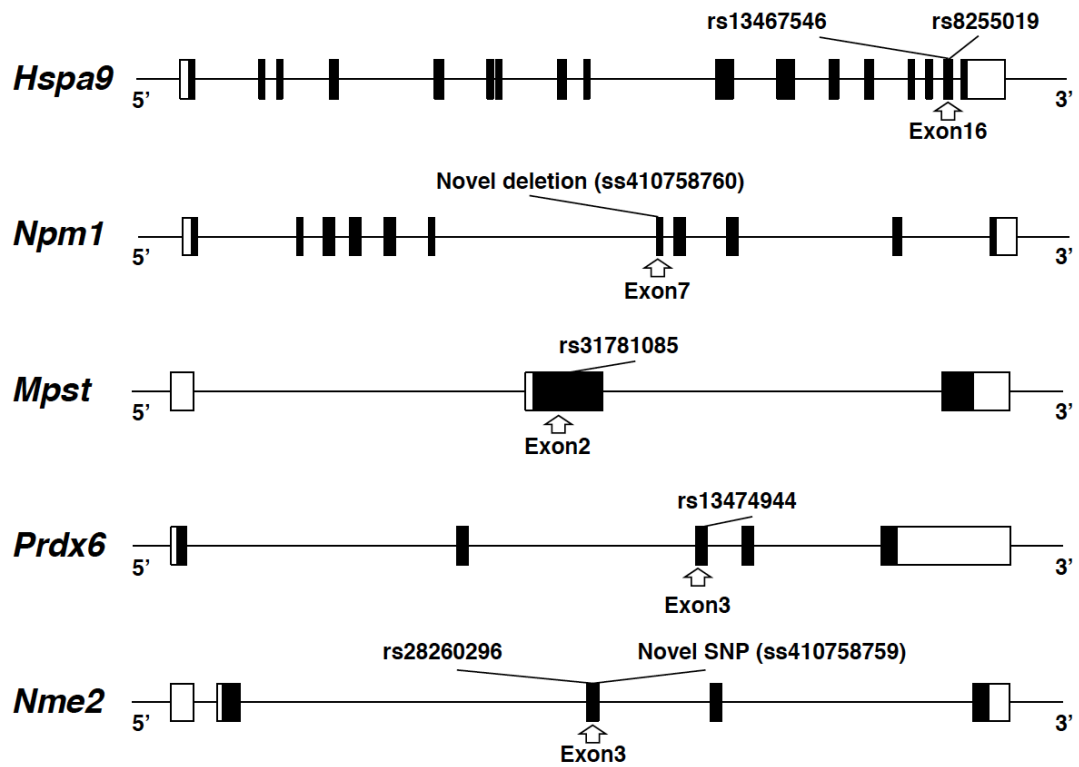

**Appendix Figure S2. The structures of genes corresponding to proteins identified by proteomics.** Sites found to be polymorphic between B6 and C3H are also indicated. See the text for the details.

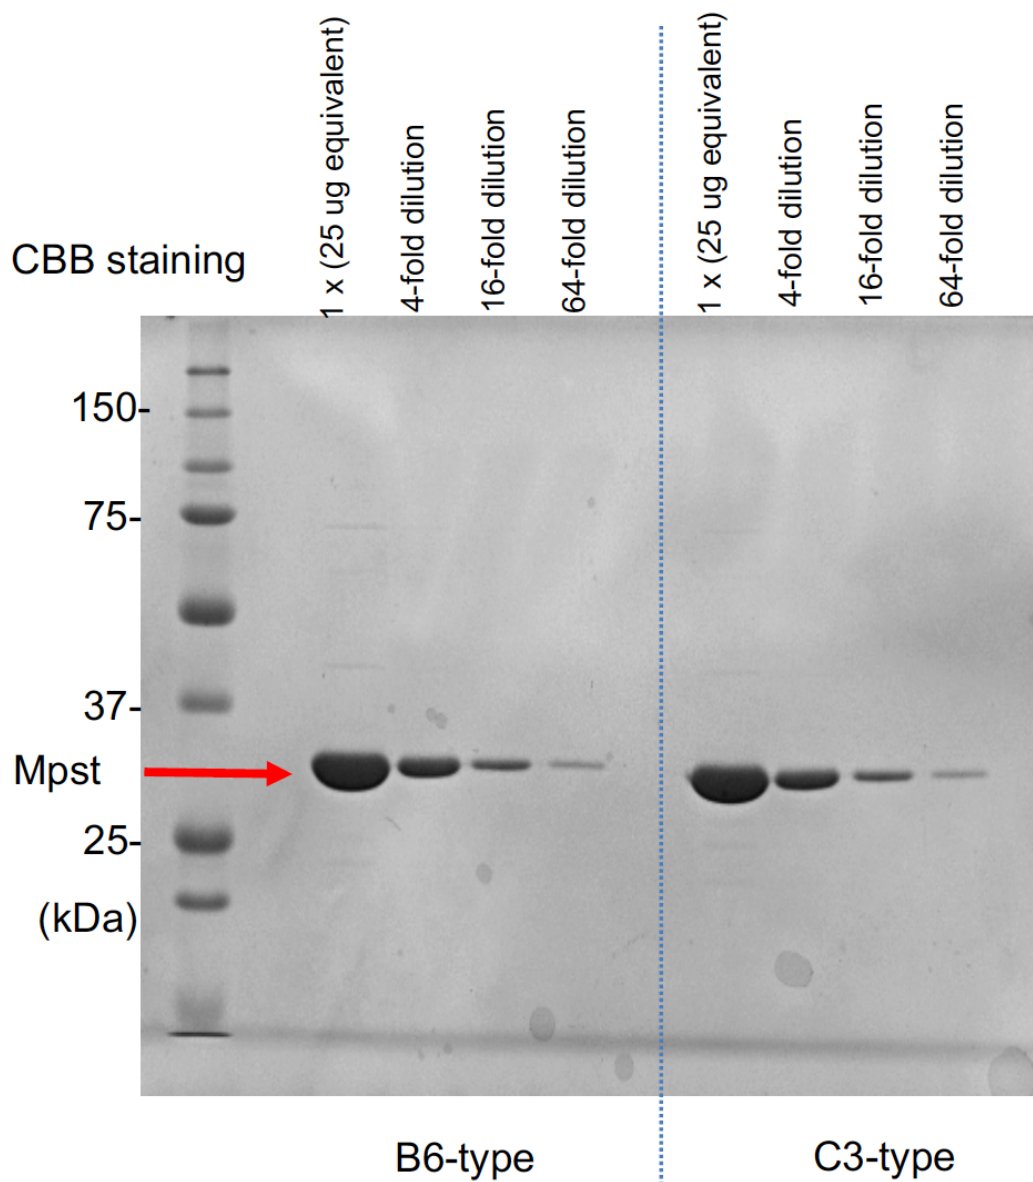

**Appendix Figure S3. Purification of recombinant MPST proteins.** B6-and C3-type MPST proteins (indicated by an arrow) produced in *E. coli* were purified, and their 4-fold serial dilution series were subjected to SDS-PAGE followed by CBB (Coomassie Brilliant Blue) staining.

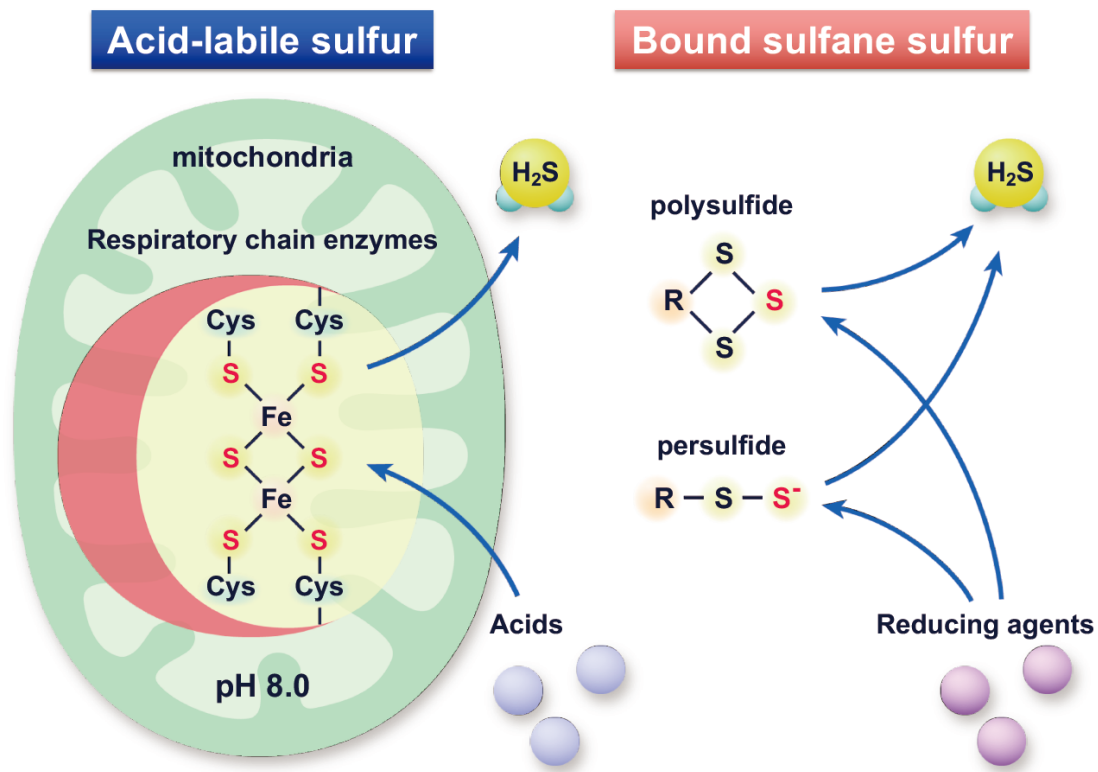

**Appendix Figure S4. Production of hydrogen sulfide from acid-labile sulfur and bound sulfane sulfur.** Hydrogen sulfide is released under the acidic condition from acid-labile sulfur species in the heme moiety of cytochrome c and other molecules. Bound sulfane sulfur such as polysulfide and persulfide also produce hydrogen sulfide in the presence of reducing agents.

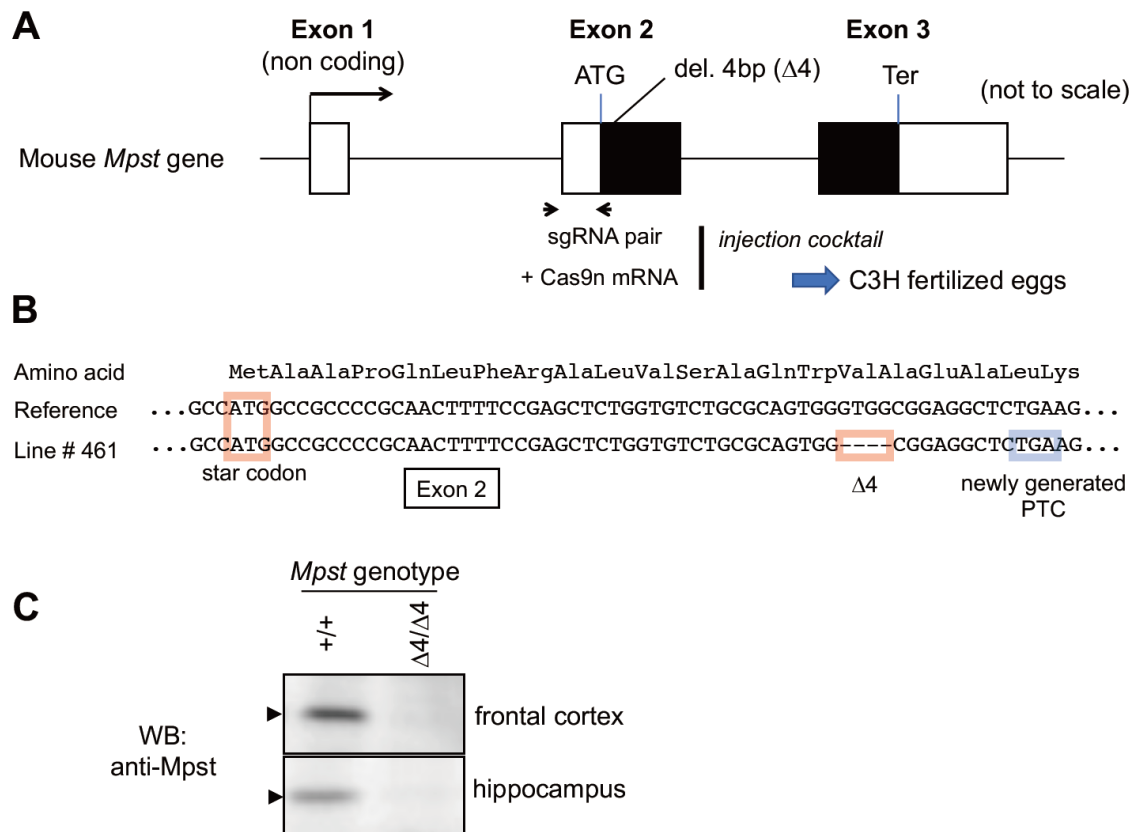

**Appendix Figure S5. Generation of *Mpst* KO mice.** (A) The CRISPR-Cas9n methodology was used to produce *Mpst* KO allele in mice. The upstream sgRNA was designed around the transcription start site of the gene, and the downstream one around the translation start site. The pair of the two sgRNA was microinjected into fertilized eggs of C3H mice with Cas9n mRNA. (B) Four bases (boxed in orange) in the first coding exon (exon 2) are deleted in the founder line #461, generating a novel premature termination codon (PTC, boxed in light blue) downstream of the deletion. The start codon is also boxed in orange. (C) Western blot analysis confirmed that homozygote for the deletion ( $\Delta 4/\Delta 4$ ) lacks the *Mpst* protein in the frontal cortex or hippocampus.



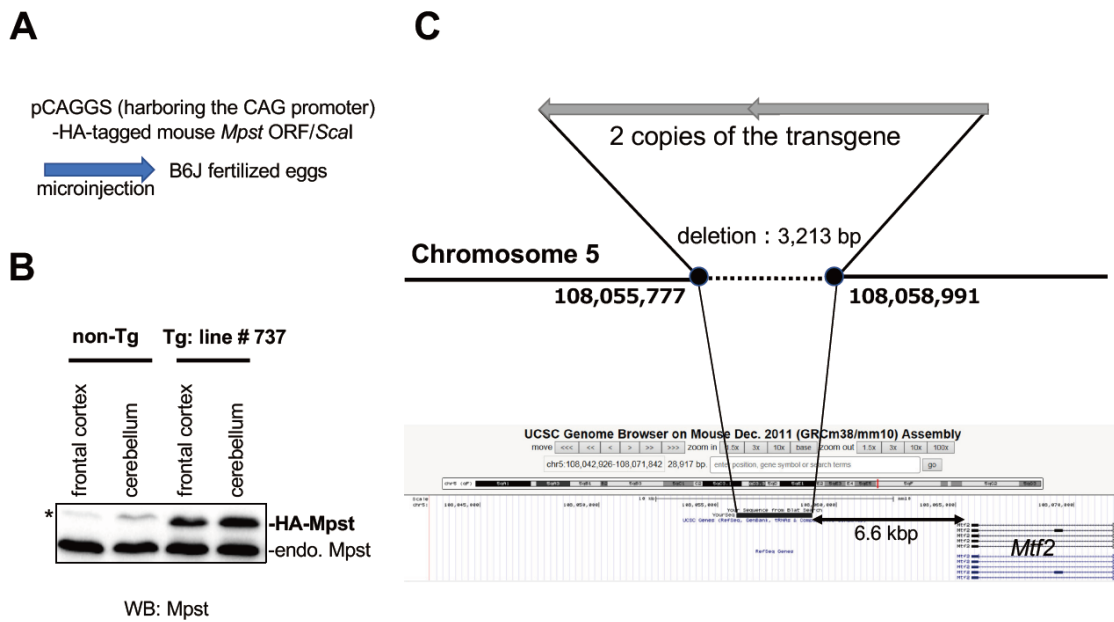

**Appendix Figure S6. Generation of *Mpst* transgenic mice.** (A) The strategy to generate *Mpst*-Tg mouse is shown. HA-tagged *Mpst* was placed under the control of the CAG promoter. (B) Expression of the transgene was confirmed by western blotting with anti-*Mpst* antibody in the frontal cortex and cerebellum. Note that the upper and lower bands correspond to the transgene-derived HA-*Mpst* and endogenous (endo.) *Mpst* proteins, respectively. The asterisk indicates the position for a non-specific band. (C) NGS analysis identified the integration site of the transgene at chromosome 5. Two copies of the transgene were replaced with a ~3.2 kbp region of chromosome 5.

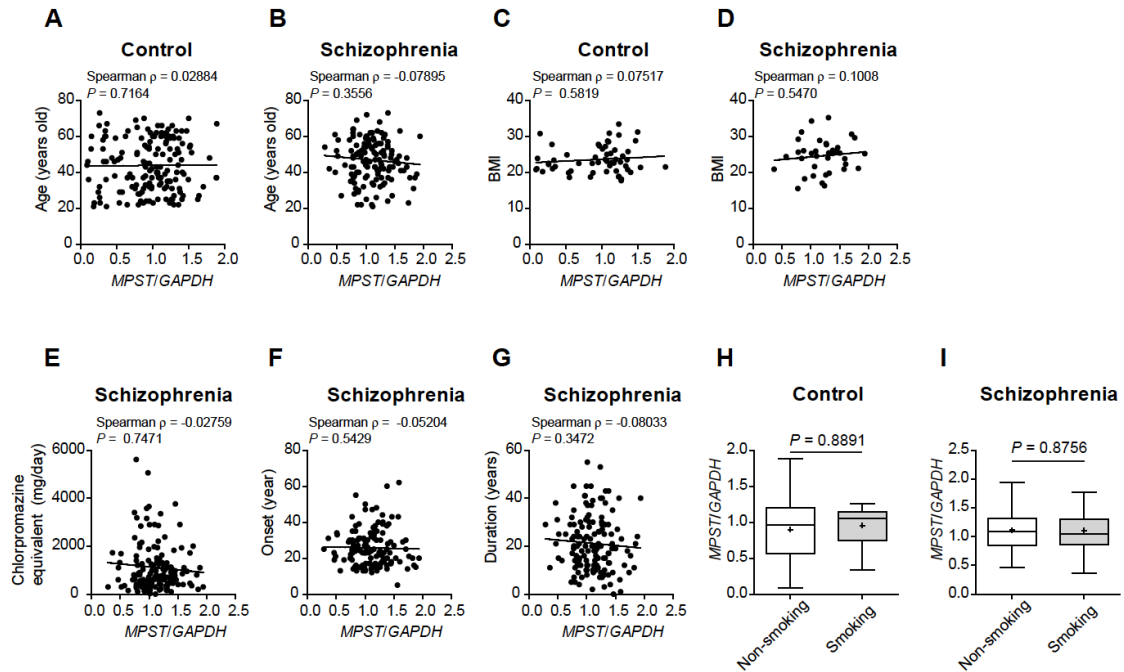

**Appendix Figure S7. No confounding factors affect the expression level of the *MPST* transcripts in postmortem brain samples. (A, B)** No correlation was found between the *MPST* expression and age in control (A) or schizophrenia (B) subjects. (C, D) No correlation was found between the *MPST* expression and BMI in control (C) or schizophrenia (D) subjects. (E-G) No correlation was found between the *MPST* expression and the amounts of antipsychotics taken (chlorpromazine equivalent) (E), age of onset (F) or disease duration (G) in schizophrenic patients. (H, I) Smoking did not affect the levels of the *MPST* expression in control (H) or schizophrenia (I) subjects.

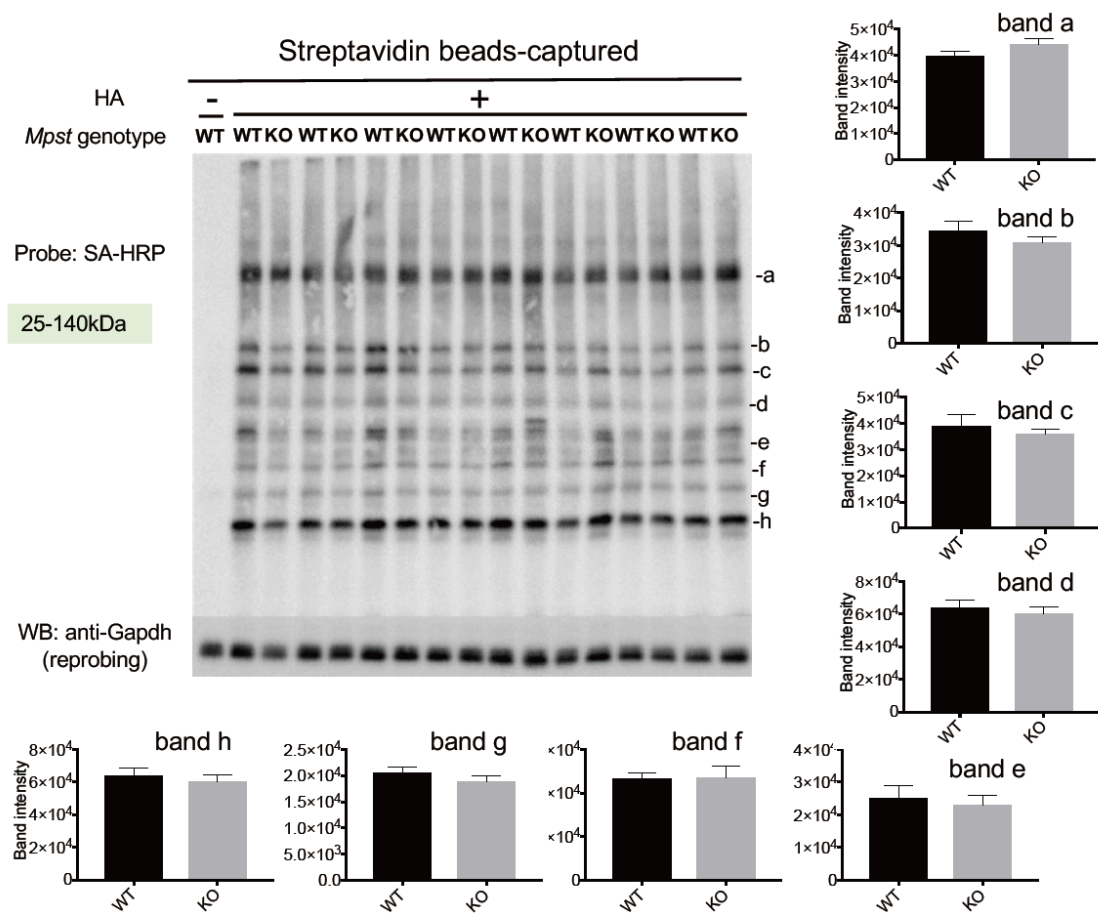

**Appendix Figure S8. Global protein S-palmitoylation was not affected by a genetic ablation of the *Mpst* gene.** Global protein S-palmitoylation was tested by the modified ABE method. After the treatment with (+) or without (-) hydroxylamine (HA), the proteins captured with streptavidin beads were subjected to SDS-PAGE. Biotinylated proteins transferred onto a PVDF membrane were detected with HRP-labeled streptavidin and chemiluminescent substrate, producing discrete bands a-h. The sample before beads capturing (input) was also analyzed. The membrane was re-probed with anti-Gapdh antibody. The band intensities were compared between WT and *Mpst* KO animals. The data are shown as means  $\pm$  SEM ( $n = 8$  for each genotype) in the bar graphs.

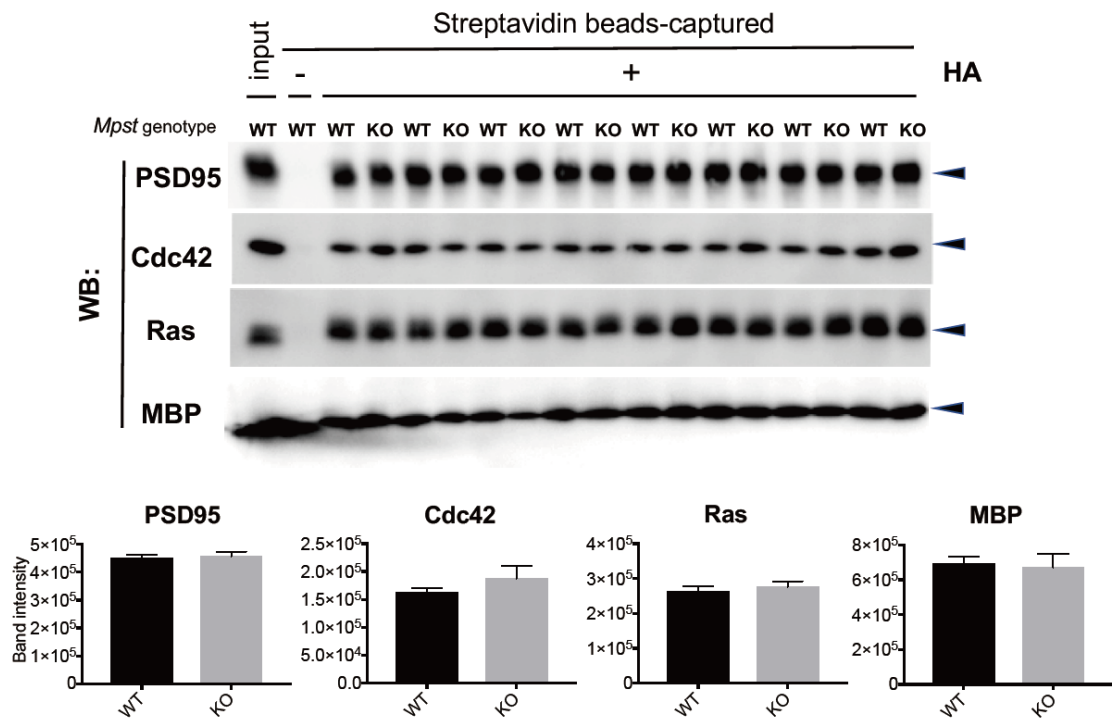

**Appendix Figure S9. S-palmitoylation on specific proteins was not affected by a genetic ablation of the *Mpst* gene.** A part of the proteins captured by the streptavidin beads (Appendix Figure S8) was subjected to conventional western blotting with antibodies against PSD95, Cdc42, Ras and MBP. The data were shown as means  $\pm$  SEM (n = 8 for each genotype) in the bar graphs.

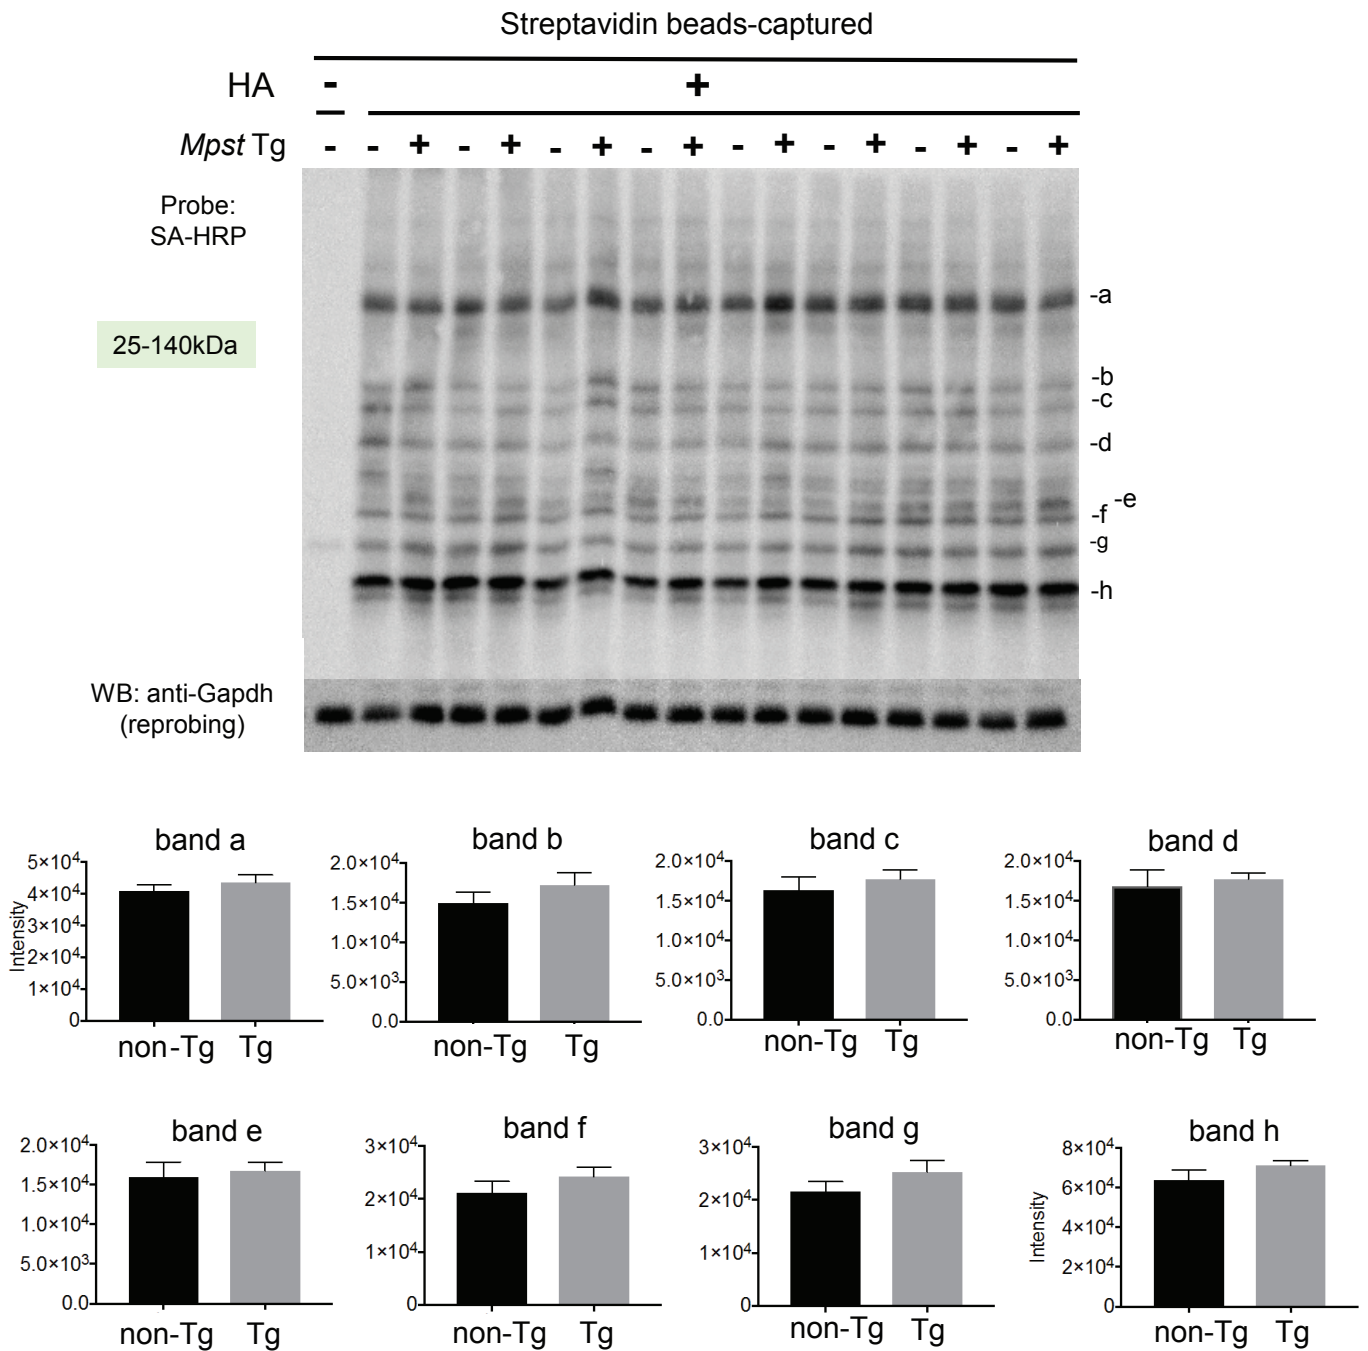

**Appendix Figure S10.** Global protein S-palmitoylation was not affected by overexpression of the *Mpst* protein. The experiment was done as in Appendix Figure S8.

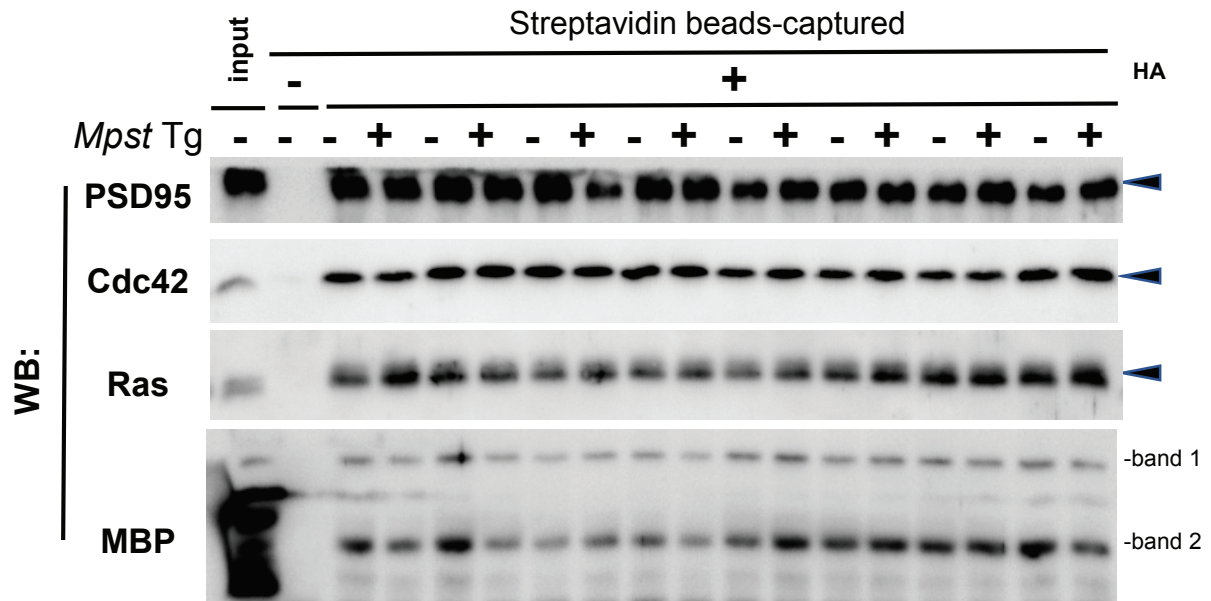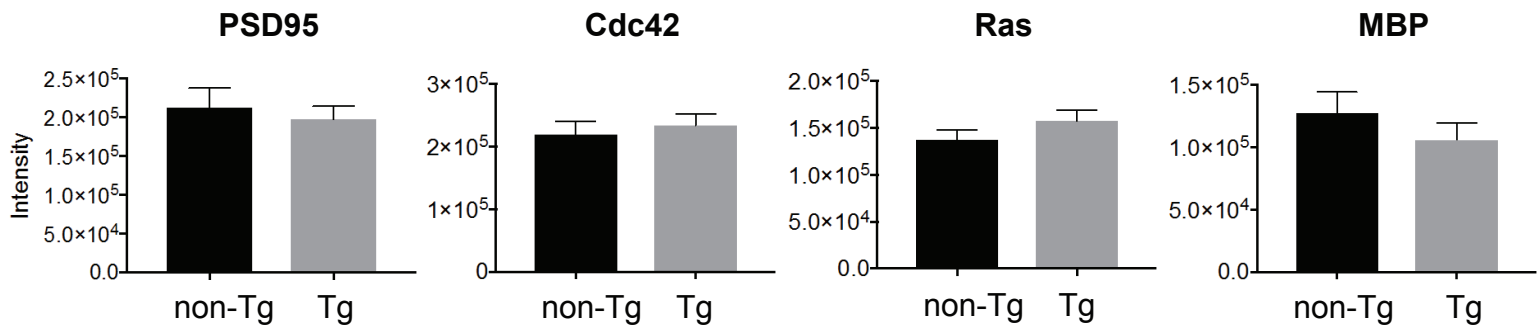

**Appendix Figure S11.** S-palmitoylation on specific proteins was not affected by overexpression of the Mpst protein. The experiment was done as in Appendix Figure S9.

**Mouse *Mpst* (GRCm38/mm10)**

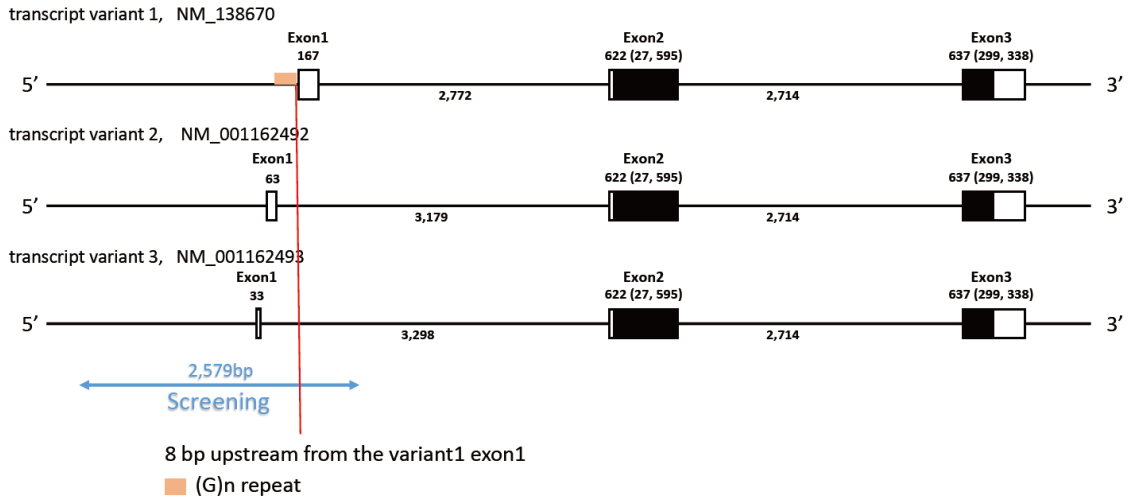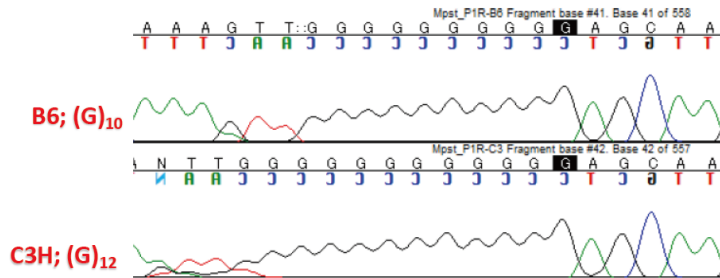

**Appendix Figure S12. Three variants of the mouse *Mpst* gene and polymorphic region between the two inbred strains B6 and C3H.** The 2.5-kb spanning three independent promoters and corresponding non-coding exon 1 regions was sequenced. The upstream region of exon1 of the variant 1 was found polymorphic.

# Mouse *Mpst*

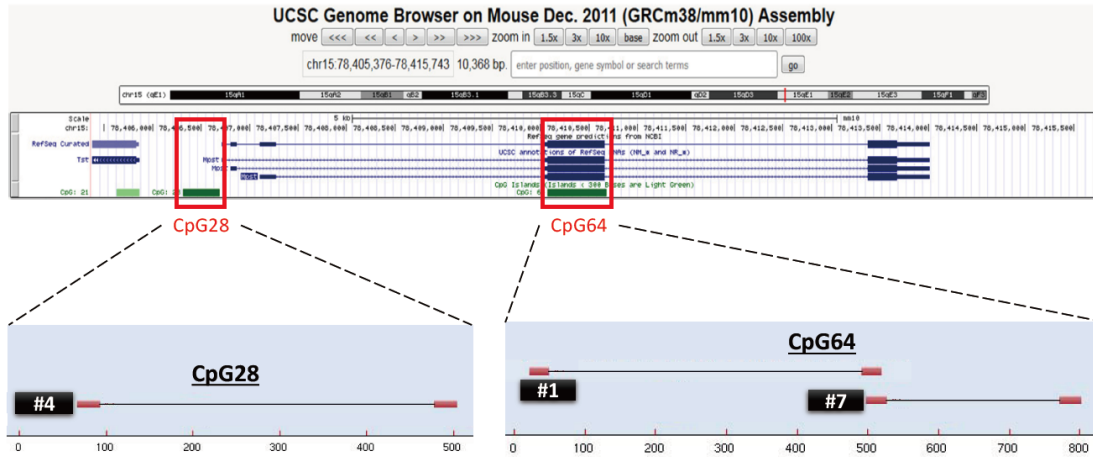

**Appendix Figure S13. Two CpG islands at the mouse *Mpst* locus.** The mouse *Mpst* locus harbors two CpG islands, CpG28 and CpG64. The positions for the probing intervals are indicated.



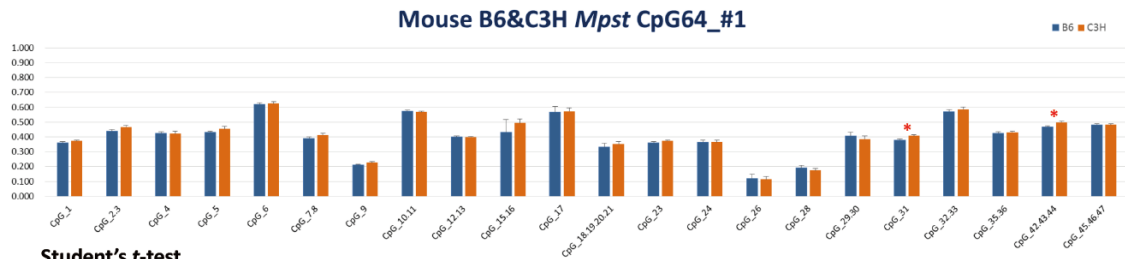

**Student's t-test**

|         | CpG_1        | CpG_2.3      | CpG_4        | CpG_5        | CpG_6        | CpG_7.8      | CpG_9        | CpG_10.11    | CpG_12.13    | CpG_15.16    | CpG_17       | CpG_18.19.20.21 | CpG_23       |
|---------|--------------|--------------|--------------|--------------|--------------|--------------|--------------|--------------|--------------|--------------|--------------|-----------------|--------------|
| P value | 0.2249<br>ns | 0.1259<br>ns | 0.9151<br>ns | 0.2324<br>ns | 0.8955<br>ns | 0.1049<br>ns | 0.0522<br>ns | 0.6773<br>ns | 0.9488<br>ns | 0.4361<br>ns | 0.8852<br>ns | 0.5841<br>ns    | 0.2249<br>ns |

|         | CpG_24       | CpG_26       | CpG_28       | CpG_29.30    | CpG_31      | CpG_32.33    | CpG_35.36    | CpG_42.43.44 | CpG_45.46.47 |
|---------|--------------|--------------|--------------|--------------|-------------|--------------|--------------|--------------|--------------|
| P value | 0.9815<br>ns | 0.8559<br>ns | 0.4383<br>ns | 0.5292<br>ns | 0.0165<br>* | 0.4122<br>ns | 0.6289<br>ns | 0.0158<br>*  | 0.9788<br>ns |

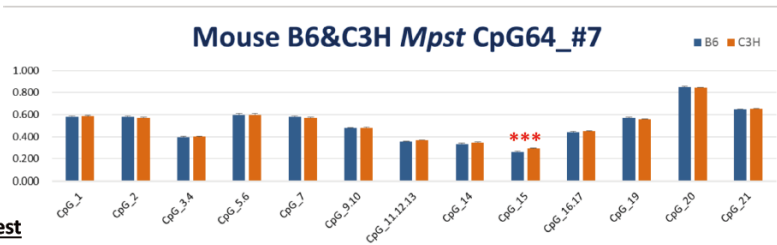

**Student's t-test**

|         | CpG_1        | CpG_2        | CpG_3.4      | CpG_5.6      | CpG_7        | CpG_9.10     | CpG_11.12.13 | CpG_14       | CpG_15        | CpG_16.17    | CpG_19       | CpG_20       | CpG_21      |
|---------|--------------|--------------|--------------|--------------|--------------|--------------|--------------|--------------|---------------|--------------|--------------|--------------|-------------|
| P value | 0.6752<br>ns | 0.2722<br>ns | 0.6653<br>ns | 0.9119<br>ns | 0.2722<br>ns | 0.7837<br>ns | 0.1095<br>ns | 0.1053<br>ns | 0.0002<br>*** | 0.3449<br>ns | 0.0928<br>ns | 0.4439<br>ns | 0.468<br>ns |

**Appendix Figure S14. Comparison of the methylation levels between B6 and C3H.** Brains from B6 shows significantly lower methylation levels than those of C3H in CpG\_31 and CpG\_42.43.44 in the probing interval 1 (top) and CpG\_15 in the probing interval 7 (bottom). Data are indicated as mean  $\pm$  SEM. Student *t*-test, \*:  $P < 0.05$ , \*\*\*:  $P < 0.001$

# Human *MPST*

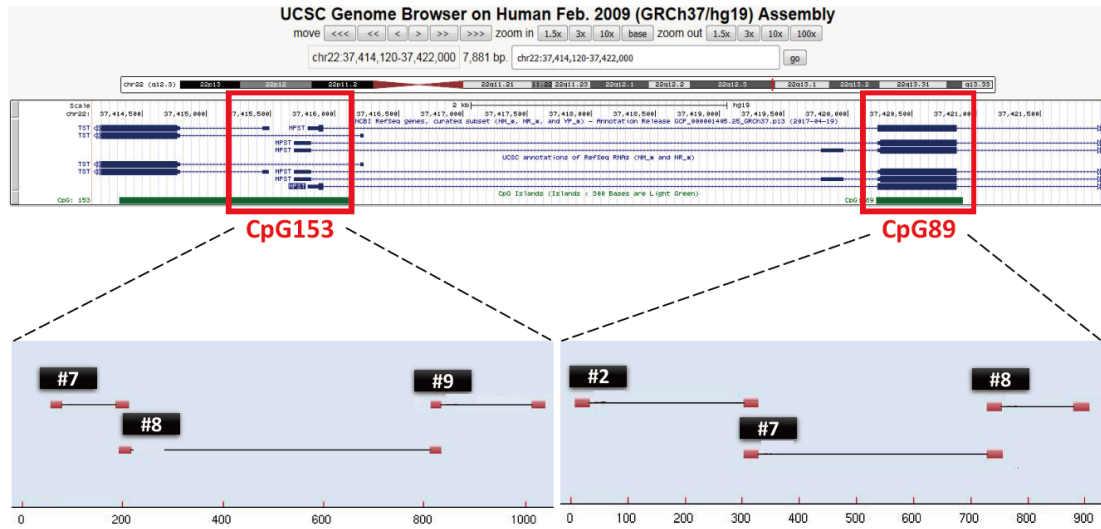

**Appendix Figure S15. Two CpG islands at the human *MPST* locus.** The human *MPST* locus harbors two CpG islands, CpG153 and CpG89. The positions for the probing intervals are indicated.

# Human CBS

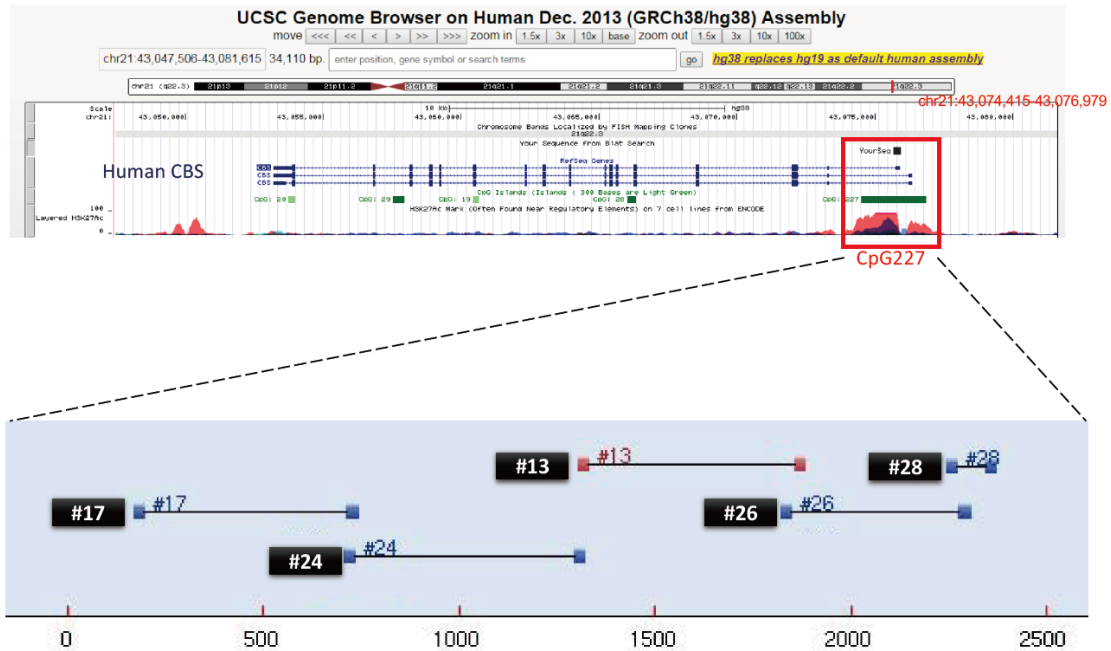

**Appendix Figure S16. CpG island at the human *CBS* locus.** The human *CBS* locus harbors a CpG island, CpG227. The positions for the probing intervals are indicated.

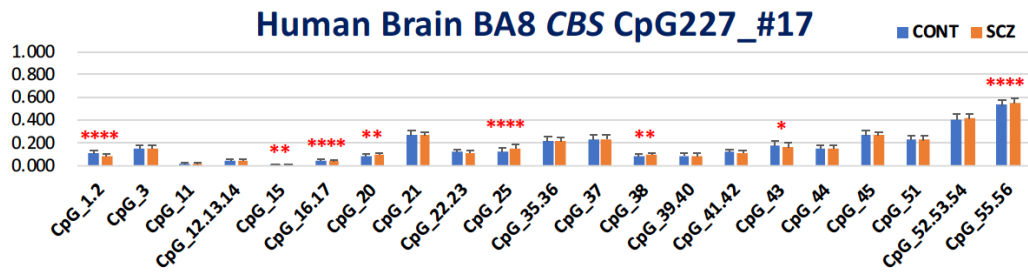

**Mann Whitney U test**

|         |           |           |        |              |        |           |              |           |           |          |           |        |        |
|---------|-----------|-----------|--------|--------------|--------|-----------|--------------|-----------|-----------|----------|-----------|--------|--------|
|         | CpG_1,2   | CpG_3     | CpG_11 | CpG_12.13.14 | CpG_15 | CpG_16.17 | CpG_20       | CpG_21    | CpG_22.23 | CpG_25   | CpG_35.36 | CpG_37 | CpG_38 |
| P value | < 0.0001  | 0.5844    | 0.465  | 0.7418       | 0.002  | < 0.0001  | 0.0013       | 0.8247    | 0.1912    | < 0.0001 | 0.3546    | 0.1483 | 0.0013 |
|         | ****      | ns        | ns     | ns           | **     | ****      | **           | ns        | ns        | ****     | ns        | ns     | **     |
|         | CpG_39.40 | CpG_41.42 | CpG_43 | CpG_44       | CpG_45 | CpG_51    | CpG_52.53.54 | CpG_55.56 |           |          |           |        |        |
| P value | 0.6416    | 0.1912    | 0.0203 | 0.5844       | 0.8247 | 0.7325    | 0.2131       | < 0.0001  |           |          |           |        |        |
|         | ns        | ns        | *      | ns           | ns     | ns        | ns           | ****      |           |          |           |        |        |

**Appendix Figure S17. The methylation levels of the *CBS* locus in the postmortem brain from schizophrenia patients.** Schizophrenia shows dysregulated methylation levels at the probing interval #17 of CpG227. Data are indicated as mean  $\pm$  SEM. Student *t*-test, \*:  $P < 0.05$ , \*\*:  $P < 0.01$ , \*\*\*:  $P < 0.001$ , \*\*\*\*:  $P < 0.0001$ .

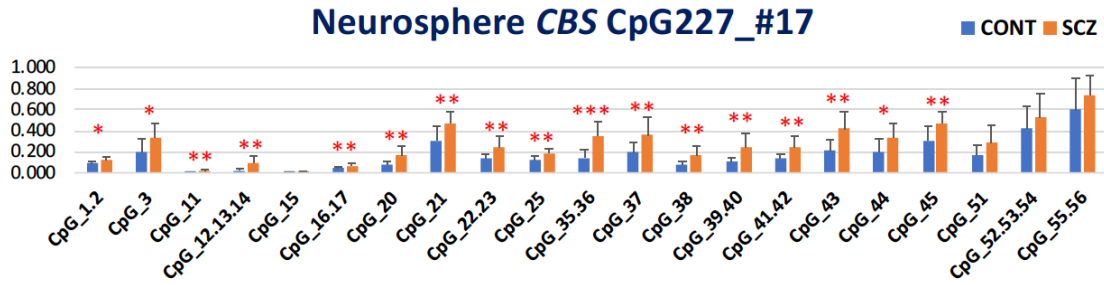

**Student's *t*-test**

|                | CpG_1.2     | CpG_3       | CpG_11       | CpG_12.13.14 | CpG_15       | CpG_16.17    | CpG_20       | CpG_21      | CpG_22.23    | CpG_25       | CpG_35.36     |
|----------------|-------------|-------------|--------------|--------------|--------------|--------------|--------------|-------------|--------------|--------------|---------------|
| <i>P</i> value | 0.0143<br>* | 0.0168<br>* | 0.0045<br>** | 0.0011<br>** | 0.0746<br>ns | 0.0075<br>** | 0.0043<br>** | 0.005<br>** | 0.0038<br>** | 0.0012<br>** | 0.0002<br>*** |

  

|                | CpG_37       | CpG_38       | CpG_39.40    | CpG_41.42    | CpG_43       | CpG_44      | CpG_45      | CpG_51       | CpG_52.53.54 | CpG_55.56    |
|----------------|--------------|--------------|--------------|--------------|--------------|-------------|-------------|--------------|--------------|--------------|
| <i>P</i> value | 0.0098<br>** | 0.0043<br>** | 0.0044<br>** | 0.0038<br>** | 0.0017<br>** | 0.0168<br>* | 0.005<br>** | 0.0565<br>ns | 0.2704<br>ns | 0.1915<br>ns |

**Appendix Figure S18.** The methylation levels of the *CBS* locus in neurosphere differentiated from schizophrenia patient-specific iPSC. Schizophrenia showed higher methylation levels than control at the probing interval #17 of CpG227. Data are indicated as mean  $\pm$  SEM. Student *t*-test, \*:  $P < 0.05$ , \*\*:  $P < 0.01$ , \*\*\*:  $P < 0.001$ , \*\*\*\*:  $P < 0.0001$ .

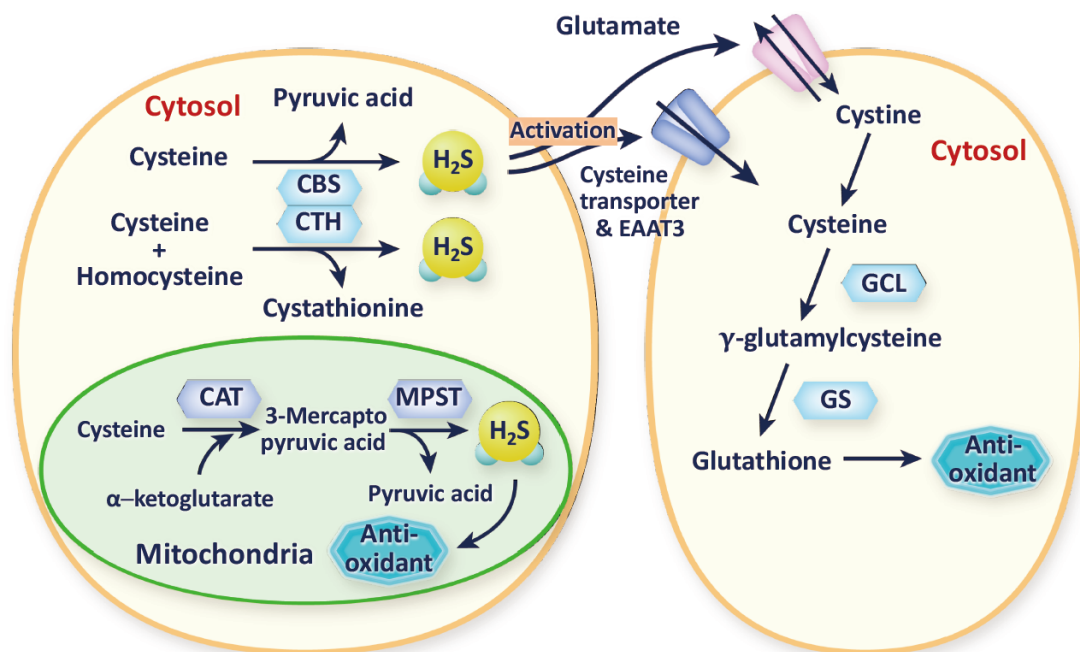

**Appendix Figure S19. Oxidative stress and hydrogen sulfide.** Cellular glutathione (GSH) is consumed to protect cells from oxidative stress, in turn activating synthesis of hydrogen sulfide and GSH. CBS; cystathionine β-synthase, CTH; cystathionine γ-lyase, MPST; 3-mercaptopruvate sulfurtransferase, CAT; cysteine aminotransferase, GCL; glutamate-cysteine ligase, GS; glutathione synthetase.

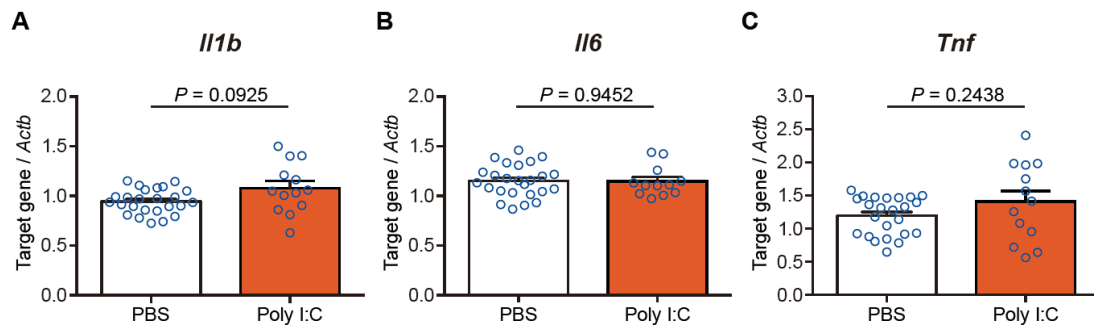

**Appendix Figure S20. No upregulation of typical inflammatory gene expression in offspring from the poly-I:C-treated dams at adult stage.** The expressions of *Il1b*, *Il6* and *Tnf* in the brain were examined at adult stage. The expression levels of the three genes were normalized to that of *Actb* encoding  $\beta$  actin. Data are indicated as mean  $\pm$  SEM.  $P$  value was calculated using unpaired two-tailed  $t$ -test.

**Appendix Table S1. Experimental design for 2D-DIGE.**

| Gel No. | Cy3       |                  | Cy5       |        | Cy2             |        |
|---------|-----------|------------------|-----------|--------|-----------------|--------|
|         | Sample ID | Tissue           | Sample ID | Tissue | Sample ID       | Tissue |
| 1       | B6-1      | FC <sup>a</sup>  | C3H-1     | FC     | IS <sup>b</sup> | FC     |
| 2       | B6-2      | FC               | C3H-2     | FC     | IS              | FC     |
| 3       | B6-3      | FC               | C3H-3     | FC     | IS              | FC     |
| 4       | B6-4      | FC               | C3H-4     | FC     | IS              | FC     |
| 5       | B6-1      | Lym <sup>c</sup> | C3H-1     | Lym    | IS              | Lym    |
| 6       | B6-2      | Lym              | C3H-2     | Lym    | IS              | Lym    |
| 7       | B6-3      | Lym              | C3H-3     | Lym    | IS              | Lym    |
| 8       | B6-4      | Lym              | C3H-4     | Lym    | IS              | Lym    |

<sup>a</sup> FC, Frontal cortex of brain

<sup>b</sup> IS, Internal standard, a mixture of all samples in each tissue

<sup>c</sup> Lym, Spleen-derived lymphocytes



**Appendix Table S2. Differentially expressed proteins between B6 and C3H mice analyzed by 2D-DIGE.**

| Tissue              | Differentially expressed protein spots <sup>a</sup> |          |       | Total number of spots |
|---------------------|-----------------------------------------------------|----------|-------|-----------------------|
|                     | B6 > C3H                                            | B6 < C3H | Total |                       |
| Brain               | 18                                                  | 25       | 43    | 1,093                 |
| Lymphocytes         | 72                                                  | 59       | 131   | 1,400                 |
| Brain & Lymphocytes | 6                                                   | 10       | 16    | not applicable        |

<sup>a</sup> B6 > C3 and B6 < C3 signify higher and lower intensities of spots in B6 compared with C3H mice, respectively. Significance was determined by  $P < 0.05$  and a fold change > 1.2.

**Appendix Table S3. List of identified proteins showing similar alteration.**

| Spot No.  | Protein Identification      | Acc. No. | Theo. pI /mass | Tissue           | Matched peptides | Sequence coverage | MASCO T score | Peptides    |                                 |           |           |           |         |                              |
|-----------|-----------------------------|----------|----------------|------------------|------------------|-------------------|---------------|-------------|---------------------------------|-----------|-----------|-----------|---------|------------------------------|
|           |                             |          |                |                  |                  |                   |               | Start - End | Observed Mr (expt) <sup>c</sup> | Mr (expt) | Mr (calc) | Delta     | Miss    | Sequence                     |
| 1         | Heat shock 70 kDa protein 9 | A48127   | 5.81/73701     | FC <sup>a</sup>  | 6                | 12%               | 72            | 188 - 202   | 1694.95                         | 1693.94   | 1693.84   | 0.10      | 0       | NAVITVPAYFNDSQR              |
|           |                             |          |                |                  |                  |                   |               | 266 - 284   | 2056.03                         | 2055.02   | 2054.95   | 0.07      | 0       | STNGDTFLGGEDFDQALLR          |
|           |                             |          |                |                  |                  |                   |               | 349 - 360   | 1333.79                         | 1332.78   | 1332.73   | 0.05      | 0       | AQFEGIVTDLIK                 |
|           |                             |          |                |                  |                  |                   |               | 378 - 391   | 1462.78                         | 1461.77   | 1461.75   | 0.02      | 0       | SDIGEVLVGGMTR                |
|           |                             |          |                |                  |                  |                   |               | 395 - 405   | 1290.76                         | 1289.75   | 1289.67   | 0.08      | 0       | VQQTVQDLFGR                  |
|           |                             |          |                |                  |                  |                   |               | 499 - 513   | 1593.05                         | 1592.04   | 1591.94   | 0.1       | 0       | LLGQFTLIGIPPAPR              |
|           |                             |          |                | Lym <sup>b</sup> | 7                | 14%               | 85            | 160 - 173   | 1569.87                         | 1568.86   | 1568.83   | 0.04      | 0       | LYSPSQIGAFVLMK Oxidation (M) |
|           |                             |          |                |                  |                  |                   |               | 188 - 202   | 1694.94                         | 1693.93   | 1693.84   | 0.09      | 0       | NAVITVPAYFNDSQR              |
|           |                             |          |                |                  |                  |                   |               | 266 - 284   | 2056.02                         | 2055.01   | 2054.95   | 0.06      | 0       | STNGDTFLGGEDFDQALLR          |
|           |                             |          |                |                  |                  |                   |               | 349 - 360   | 1333.79                         | 1332.78   | 1332.73   | 0.05      | 0       | AQFEGIVTDLIK                 |
|           |                             |          |                |                  |                  |                   |               | 378 - 391   | 1462.76                         | 1461.75   | 1461.75   | 0.00      | 0       | SDIGEVLVGGMTR Oxidation (M)  |
|           |                             |          |                |                  |                  |                   |               | 395 - 405   | 1290.78                         | 1289.77   | 1289.67   | 0.10      | 0       | VQQTVQDLFGR                  |
|           |                             |          |                |                  |                  |                   |               | 499 - 513   | 1593.03                         | 1592.02   | 1591.94   | 0.08      | 0       | LLGQFTLIGIPPAPR              |
|           |                             |          |                |                  |                  |                   |               | FC          | 6                               | 10%       | 74        | 174 - 187 | 1592.59 | 1591.58                      |
| 176 - 187 | 1333.46                     | 1332.45  | 1332.63        | -0.18            | 0                | ETAENYLGHSTAK     |               |             |                                 |           |           |           |         |                              |

|   |               |        |            |     |   |     |    |           |         |         |         |       |   |                                       |
|---|---------------|--------|------------|-----|---|-----|----|-----------|---------|---------|---------|-------|---|---------------------------------------|
|   |               |        |            |     |   |     |    | 188 – 202 | 1694.43 | 1693.42 | 1693.84 | -0.42 | 0 | NAVITVPAYFNDSQR                       |
|   |               |        |            |     |   |     |    | 266 – 284 | 2056.25 | 2055.24 | 2054.95 | 0.29  | 0 | STNGDTFLGGEDFDQALLR                   |
|   |               |        |            |     |   |     |    | 378 – 391 | 1462.42 | 1461.41 | 1461.75 | -0.34 | 0 | SDIGEVILVGGMTR<br>Oxidation (M)       |
|   |               |        |            |     |   |     |    | 395 – 405 | 1290.5  | 1289.49 | 1289.67 | -0.18 | 0 | VQQTVQDLFGR                           |
|   |               |        |            | Lym | 6 | 12% | 72 | 188 - 202 | 1694.97 | 1693.96 | 1693.84 | 0.12  | 0 | NAVITVPAYFNDSQR                       |
|   |               |        |            |     |   |     |    | 266 - 284 | 2056    | 2054.99 | 2054.95 | 0.04  | 0 | STNGDTFLGGEDFDQALLR                   |
|   |               |        |            |     |   |     |    | 349 - 360 | 1333.82 | 1332.81 | 1332.73 | 0.08  | 0 | AQFEGIVTDLIK                          |
|   |               |        |            |     |   |     |    | 378 - 391 | 1462.86 | 1461.85 | 1461.75 | 0.10  | 0 | SDIGEVILVGGMTR<br>Oxidation (M)       |
|   |               |        |            |     |   |     |    | 395 - 405 | 1290.79 | 1289.78 | 1289.67 | 0.11  | 0 | VQQTVQDLFGR                           |
|   |               |        |            |     |   |     |    | 499 - 513 | 1593.03 | 1592.02 | 1591.94 | 0.08  | 0 | LLGQFTLIGIPPAPR                       |
| 3 | Nucleophosmin | Q5SQB0 | 4.62/32739 | FC  |   | -   | -  |           |         |         |         |       |   |                                       |
|   |               |        |            | Lym | 6 | 25% | 68 | 33 - 45   | 1568.84 | 1567.83 | 1567.72 | 0.11  | 0 | VDNDENEHQLSLR                         |
|   |               |        |            |     |   |     |    | 55 - 73   | 2161.02 | 2160.01 | 2160    | 0.01  | 0 | DELHIVEAEAMNYEGSPIK<br>Oxidation (M)  |
|   |               |        |            |     |   |     |    | 81 - 101  | 2227.23 | 2226.22 | 2226.21 | 0.01  | 0 | MSVQPTVSLGGFEITPPVVL                  |
|   |               |        |            |     |   |     |    | 81 - 101  | 2243.24 | 2242.23 | 2242.2  | 0.03  | 0 | MSVQPTVSLGGFEITPPVVL<br>Oxidation (M) |
|   |               |        |            |     |   |     |    | 248 - 261 | 1819.99 | 1818.98 | 1818.84 | 0.15  | 0 | MTDQEIQLDWQWR                         |
|   |               |        |            |     |   |     |    | 248 - 261 | 1835.94 | 1834.93 | 1834.83 | 0.10  | 0 | MTDQEIQLDWQWR                         |

|    |                                                         |        |            |           |         |         |         |           |         |               |               |      |   |                       |
|----|---------------------------------------------------------|--------|------------|-----------|---------|---------|---------|-----------|---------|---------------|---------------|------|---|-----------------------|
|    |                                                         |        |            |           |         |         |         |           |         |               |               |      |   | Oxidation (M)         |
| 4  | Nucleophosmin                                           | Q5SQB0 | 4.62/32739 | FC        |         | -       | -       |           |         |               |               |      |   |                       |
|    |                                                         |        |            | Lym       | 7       | 27%     | 85      | 28 - 45   | 2259.26 | 2258.25       | 2258.04       | 0.22 | 1 | DYHFKVDNDENEHQLSLR    |
|    |                                                         |        |            |           |         |         |         | 33 - 45   | 1568.92 | 1567.91       | 1567.72       | 0.19 | 0 | VNDENEHQLSLR          |
|    |                                                         |        |            |           |         |         |         | 55 - 73   | 2161.02 | 2160.01       | 2160          | 0.01 | 0 | DELHIVEAEAMNYEGSPIK   |
|    |                                                         |        |            |           |         |         |         |           |         |               |               |      |   | Oxidation (M)         |
|    |                                                         |        |            |           |         |         |         | 81 - 101  | 2227.23 | 2226.22       | 2226.21       | 0.01 | 0 | MSVQPTVSLGGFEITPPVVL  |
|    |                                                         |        |            |           |         |         |         | 81 - 101  | 2243.24 | 2242.23       | 2242.2        | 0.03 | 0 | MSVQPTVSLGGFEITPPVVL  |
|    |                                                         |        |            |           |         |         |         |           |         |               | Oxidation (M) |      |   |                       |
|    |                                                         |        |            | 248 - 261 | 1819.95 | 1818.94 | 1818.84 | 0.11      | 0       | MTDQEIQLDWQWR |               |      |   |                       |
|    |                                                         |        |            | 248 - 261 | 1835.9  | 1834.89 | 1834.83 | 0.06      | 0       | MTDQEIQLDWQWR |               |      |   |                       |
|    |                                                         |        |            |           |         |         |         |           |         |               | Oxidation (M) |      |   |                       |
| 5  | 3-mercaptopyruvate<br>sulfurtransferase<br>(EC 2.8.1.2) | Q99J99 | 6.12/33984 | FC        | 4       | 19%     | 64      | 8 - 20    | 1453.92 | 1452.91       | 1452.81       | 0.10 | 0 | ALVSAQWVAEALK         |
|    |                                                         |        |            |           |         |         |         | 52 - 63   | 1358.83 | 1357.82       | 1357.68       | 0.14 | 0 | HIPGAAFFDIDR          |
|    |                                                         |        |            |           |         |         |         | 146 - 163 | 2058.13 | 2057.12       | 2056.99       | 0.14 | 0 | SHSEPAEFSACLDPSEFIK   |
|    |                                                         |        |            |           |         |         |         | 266 - 281 | 1988.98 | 1987.97       | 1987.88       | 0.10 | 0 | SDVPVYDGSWVEWYMR      |
|    |                                                         |        |            | Lym       |         | -       | -       |           |         |               |               |      |   |                       |
| 10 | Peroxiredoxin 6<br>(EC 1.11.1.9)                        | O08709 | 5.72/24838 | FC        | 5       | 22%     | 84      | 1 - 21    | 2142.15 | 2141.14       | 2141.08       | 0.07 | 0 | PGLLLLGDEAPNFEANTTIGR |
|    |                                                         |        |            |           |         |         |         | 97 - 105  | 1057.63 | 1056.62       | 1056.59       | 0.04 | 0 | LPFPIIDDK             |

|    |                                                 |        |            |     |   |     |    |           |         |         |         |       |   |                                   |
|----|-------------------------------------------------|--------|------------|-----|---|-----|----|-----------|---------|---------|---------|-------|---|-----------------------------------|
|    |                                                 |        |            |     |   |     |    | 132 - 140 | 1021.67 | 1020.66 | 1020.56 | 0.10  | 0 | VVFIFGPDK                         |
|    |                                                 |        |            |     |   |     |    | 132 - 141 | 1149.72 | 1148.71 | 1148.66 | 0.05  | 1 | VVFIFGPDKK                        |
|    |                                                 |        |            |     |   |     |    | 144 - 154 | 1191.8  | 1190.79 | 1190.67 | 0.13  | 0 | K.LSILYPATTGR                     |
|    |                                                 |        |            | Lym | 5 | 18% | 81 | 41 - 52   | 1395.77 | 1394.79 | 1394.65 | 0.11  | 0 | DFTPVCTTELGR                      |
|    |                                                 |        |            |     |   |     |    | 97 - 105  | 1057.63 | 1056.62 | 1056.59 | 0.04  | 0 | LPFPIDDK                          |
|    |                                                 |        |            |     |   |     |    | 132 - 140 | 1021.68 | 1020.67 | 1020.56 | 0.11  | 0 | VVFIFGPDK                         |
|    |                                                 |        |            |     |   |     |    | 132 - 141 | 1149.76 | 1148.75 | 1148.66 | 0.09  | 1 | VVFIFGPDKK                        |
|    |                                                 |        |            |     |   |     |    | 144 - 154 | 1191.69 | 1190.68 | 1190.67 | 0.02  | 0 | LSILYPATTGR                       |
| 11 | Peroxiredoxin 6<br>(EC 1.11.1.9)                | O08709 | 5.72/24838 | FC  | 5 | 20% | 83 | 97 - 105  | 1057.44 | 1056.43 | 1056.59 | -0.15 | 0 | LPFPIDDK                          |
|    |                                                 |        |            |     |   |     |    | 106 - 121 | 1755.5  | 1754.49 | 1754.96 | -0.47 | 1 | GRDLAILLGMLDPVEK<br>Oxidation (M) |
|    |                                                 |        |            |     |   |     |    | 108 - 121 | 1542.51 | 1541.5  | 1541.84 | -0.33 | 0 | DLAILLGMLDPVEK<br>Oxidation (M)   |
|    |                                                 |        |            |     |   |     |    | 132 - 141 | 1149.52 | 1148.51 | 1148.66 | -0.15 | 1 | VVFIFGPDKK                        |
|    |                                                 |        |            |     |   |     |    | 144 - 154 | 1191.53 | 1190.52 | 1190.67 | -0.14 | 0 | LSILYPATTGR                       |
|    |                                                 |        |            | Lym | 3 | 8%  | 48 | 97 - 105  | 1057.59 | 1056.58 | 1056.59 | -0.00 | 0 | LPFPIDDK                          |
|    |                                                 |        |            |     |   |     |    | 132 - 140 | 1021.59 | 1020.58 | 1020.56 | 0.02  | 0 | VVFIFGPDK                         |
|    |                                                 |        |            |     |   |     |    | 132 - 141 | 1149.65 | 1148.64 | 1148.66 | -0.02 | 1 | VVFIFGPDKK                        |
| 12 | Nucleoside diphosphate<br>kinase B (EC 2.7.4.6) | S29241 | 6.97/17466 | FC  | 4 | 32% | 72 | 1 - 18    | 2059.11 | 2058.1  | 2058.1  | -0.00 | 1 | MANLERTFIAIKPDGVQR                |
|    |                                                 |        |            |     |   |     |    | 7 - 18    | 1344.85 | 1343.84 | 1343.76 | 0.09  | 0 | TFIAIKPDGVQR                      |
|    |                                                 |        |            |     |   |     |    | 89 - 105  | 1802    | 1800.99 | 1800.9  | 0.09  | 0 | VMLGETNPADSKPGTIR                 |

|    |                                              |        |            |     |   |     |    |           |         |         |         |      |   |  |  |  | Oxidation (M) |                    |
|----|----------------------------------------------|--------|------------|-----|---|-----|----|-----------|---------|---------|---------|------|---|--|--|--|---------------|--------------------|
|    |                                              |        |            |     |   |     |    |           |         |         |         |      |   |  |  |  |               |                    |
|    |                                              |        |            |     |   |     |    |           |         |         |         |      |   |  |  |  |               | EIHLWFKPEELIDYK    |
|    |                                              |        |            | Lym | 3 | 21% | 54 | 1 – 18    | 2059.13 | 2058.12 | 2058.1  | 0.02 | 1 |  |  |  |               | MANLERTFIAIKPDGVQR |
|    |                                              |        |            |     |   |     |    | 7 – 18    | 1344.85 | 1343.84 | 1343.76 | 0.09 | 0 |  |  |  |               | TFIAIKPDGVQR       |
|    |                                              |        |            |     |   |     |    | 129 – 143 | 1960.07 | 1959.06 | 1959.01 | 0.05 | 0 |  |  |  |               | EIHLWFKPEELIDYK    |
| 13 | Nucleoside diphosphate kinase B (EC 2.7.4.6) | S29241 | 6.97/17466 | FC  | 3 | 24% | 52 | 7 – 18    | 1344.81 | 1343.83 | 1343.76 | 0.08 | 0 |  |  |  |               | TFIAIKPDGVQR       |
|    |                                              |        |            |     |   |     |    | 57 – 66   | 1175.74 | 1174.73 | 1174.65 | 0.08 | 0 |  |  |  |               | DRPFFPGLVK         |
|    |                                              |        |            |     |   |     |    | 129 – 143 | 1960.15 | 1959.14 | 1959.01 | 0.13 | 0 |  |  |  |               | EIHLWFKPEELIDYK    |
|    |                                              |        |            | Lym | 3 | 24% | 52 | 7 – 18    | 1344.81 | 1343.8  | 1343.76 | 0.05 | 0 |  |  |  |               | TFIAIKPDGVQR       |
|    |                                              |        |            |     |   |     |    | 57 – 66   | 1175.73 | 1174.72 | 1174.65 | 0.07 | 0 |  |  |  |               | DRPFFPGLVK         |
|    |                                              |        |            |     |   |     |    | 129 – 143 | 1960.11 | 1959.1  | 1959.01 | 0.09 | 0 |  |  |  |               | EIHLWFKPEELIDYK    |

<sup>a</sup> FC, Frontal cortex of brain

<sup>b</sup> Lym, Spleen-derived lymphocytes

<sup>c</sup> Mr, Molecular Mass

**Appendix Table S4. Identification of proteins showing consistent increases and decreases between brain and lymphocytes derived from B6 and C3H mice by 2D-DIGE.**

| Spot No. | Protein name                                           | Synonyms                                                               | Accession <sup>a</sup>           | Theoretical pI /mass <sup>b</sup> | Tissue <sup>o</sup> | Fold Change <sup>d</sup> | %Seq /No. peptides <sup>e</sup> | MASCOT score <sup>f</sup> | Western blot <sup>g</sup> |
|----------|--------------------------------------------------------|------------------------------------------------------------------------|----------------------------------|-----------------------------------|---------------------|--------------------------|---------------------------------|---------------------------|---------------------------|
| 1        | Heat shock 70kDa protein 9 (mortalin)                  | Mortalin<br>GRP 75                                                     | P38646<br>(A48127 <sup>h</sup> ) | 5.81 / 73701                      | FC                  | -2.61                    | 12% / 6                         | 72                        | Confirmed<br>4 spots      |
|          |                                                        |                                                                        |                                  |                                   | Lym                 | -3.43                    | 14% / 7                         | 85                        |                           |
| 2        | Heat shock 70kDa protein 9 (mortalin)                  | Heat shock 70 kDa protein 9<br>PBP74<br>p66 MOT                        | P38646<br>(A48127 <sup>h</sup> ) | 5.81 / 73701                      | FC                  | 2.91                     | 10% / 6                         | 74                        | Confirmed<br>4 spots      |
|          |                                                        |                                                                        |                                  |                                   | Lym                 | 3.01                     | 12% / 6                         | 72                        |                           |
| 3        | Nucleophosmin (nucleolar phosphoprotein B23, numatrin) | NPM<br>Nucleolar phosphoprotein B23                                    | Q61937<br>(Q5SQB0 <sup>h</sup> ) | 4.62 / 32739                      | FC                  | -1.42                    | -                               | -                         | Confirmed<br>3 spots      |
|          |                                                        |                                                                        |                                  |                                   | Lym                 | -3.14                    | 22% / 6                         | 66                        |                           |
| 4        | Nucleophosmin (nucleolar phosphoprotein B23, numatrin) | Numatrin<br>Nucleolar protein NO38                                     | Q61937<br>(Q5SQB0 <sup>h</sup> ) | 4.62 / 32739                      | FC                  | 2.75                     | -                               | -                         | Confirmed<br>3 spots      |
|          |                                                        |                                                                        |                                  |                                   | Lym                 | 6.4                      | 24% / 7                         | 83                        |                           |
| 5        | Mercaptopyruvate sulfurtransferase                     | MST<br>EC 2.8.1.2                                                      | Q99J99                           | 6.12 / 33984                      | FC                  | 5.62                     | 19% / 4                         | 64                        | Confirmed<br>1 spot       |
|          |                                                        |                                                                        |                                  |                                   | Lym                 | 1.59                     | -                               | -                         |                           |
| 10       | Peroxiredoxin 6                                        | EC 1.11.1.15<br>Antioxidant protein 2                                  | O08709                           | 5.72 / 24838                      | FC                  | 7.33                     | 22% / 5                         | 84                        | Confirmed<br>2 spots      |
|          |                                                        |                                                                        |                                  |                                   | Lym                 | 4.84                     | 18% / 4                         | 65                        |                           |
| 11       | Peroxiredoxin 6                                        | 1-Cys peroxiredoxin<br>Acidic calcium- independent<br>phospholipase A2 | O08709                           | 5.72 / 24838                      | FC                  | -4.2                     | 20% / 5                         | 83                        | Confirmed<br>2 spots      |
|          |                                                        |                                                                        |                                  |                                   | Lym                 | -2.88                    | 8% / 3                          | 48                        |                           |
| 12       | NME/NM23 nucleoside diphosphate kinase 2               | NDK B<br>EC 2.7.4.6                                                    | Q01768<br>(S29241 <sup>h</sup> ) | 6.97 / 17466                      | FC                  | 4.32                     | 32% / 4                         | 72                        | Confirmed<br>1 spot       |
|          |                                                        |                                                                        |                                  |                                   | Lym                 | 2.92                     | 21% / 3                         | 54                        |                           |
| 13       | NME/NM23 nucleoside diphosphate kinase 2               | nm23-H2<br>C-myc purine-binding<br>transcription factor PUF            | Q01768<br>(S29241 <sup>h</sup> ) | 6.97 / 17466                      | FC                  | -3.81                    | 24% / 3                         | 52                        | Confirmed<br>1 spot       |
|          |                                                        |                                                                        |                                  |                                   | Lym                 | -3.96                    | 24% / 3                         | 52                        |                           |

<sup>a</sup> UniProt accession<sup>b</sup> Theoretical pI and mass were calculated according to the sequence<sup>c</sup> FC, Frontal cortex of brain; Lym, lymphocytes<sup>d</sup> Minus denotes down-regulation in C3H compared to B6 mice<sup>e</sup> %Seq and No. peptides denotes percentage of sequence coverage and the number of peptides identified by PMF, respectively.<sup>f</sup> Protein Identification from peptide mass spectra were performed using MASCOT<sup>g</sup> Confirmed signifies spots in 2D-DIGE that were identical or included in the spots detected by western blotting. Indicated number of spot is the number of spots, showing identical molecular mass and different pI values, detected in western blotting<sup>h</sup> MASCOT referred to unreviewed sequences

**Appendix Table S5. Genetic variations detected in the coding regions of proteins expressed differentially between B6 and C3H mice.**

| Protein         | Gene         | dbSNP       | SNP position <sup>a</sup> | Variation                      |                       | Number of Phosphates | pI <sup>c</sup> |        | Molecular mass <sup>b</sup> |        |
|-----------------|--------------|-------------|---------------------------|--------------------------------|-----------------------|----------------------|-----------------|--------|-----------------------------|--------|
|                 |              |             |                           | B6                             | C3H                   |                      | B6              | C3H    | B6                          | C3H    |
| Mortalin        | <i>Hspa9</i> | rs13467546  | 1852 bp                   | <u>A</u> TG (Met)              | <u>G</u> TG (Val)     | 0                    | 5.81            | 5.91   | 73,460                      | 73,529 |
|                 |              |             |                           | 1                              | 5.72                  | 5.81                 | 73,538          | 73,607 |                             |        |
|                 |              | rs8255019   | 1870 bp                   | <u>G</u> GA (Gly)              | <u>C</u> GA (Arg)     | 2                    | 5.63            | 5.71   | 73,616                      | 73,684 |
|                 |              |             |                           | 3                              | 5.56                  | 5.63                 | 73,694          | 73,762 |                             |        |
| Nucleophosmin   | <i>Npm1</i>  | ss410758760 | 526-537 bp                | GATGATGATGAT<br>(AspAspAspAsp) | deletion              | 0                    | 4.62            | 4.73   | 32,568                      | 32,111 |
|                 |              |             |                           |                                |                       | 1                    | 4.59            | 4.69   | 32,646                      | 32,189 |
|                 |              |             |                           |                                |                       | 2                    | 4.56            | 4.66   | 32,724                      | 32,267 |
|                 |              |             |                           |                                |                       | 3                    | 4.53            | 4.62   | 32,802                      | 32,345 |
| MST             | <i>Mpst</i>  | rs31781085  | 305 bp                    | G <u>A</u> C (Asp102)          | G <u>G</u> C (Gly102) | -                    | 6.00            | 6.11   | 33,081                      | 33,023 |
| Peroxiredoxin-6 | <i>Prdx6</i> | rs13474944  | 371 bp                    | G <u>C</u> T (Ala)             | G <u>A</u> T (Asp)    | -                    | 5.98            | 5.71   | 24,827                      | 24,870 |
| NDK B           | <i>Nme2</i>  | rs28260296  | 168 bp                    | AA <u>A</u> (Lys)              | AA <u>C</u> (Asn)     | -                    | 6.97            | 6.52   | 17,368                      | 17,385 |
|                 |              | ss410758759 | 217 bp                    | <u>G</u> TG (Val)              | <u>A</u> TG (Met)     |                      |                 |        |                             |        |

<sup>a</sup> UCSC Genome Bioinformatics (<http://genome.ucsc.edu/cgi-bin/hgGateway>) version Feb. 2006

<sup>b</sup> Theoretical pI and molecular mass are calculated according to the amino acid sequence of each protein by using Scansite ([http://scansite.mit.edu/calc\\_mw\\_pi.html](http://scansite.mit.edu/calc_mw_pi.html))



**Appendix Table S6. Enzymatic activity of Mpst from B6 and C3H mouse brains.**

|     | <b>Km</b><br><b>(mM)</b><br><b>(mean ± SEM)</b> | <b>P value</b> | <b>Vmax</b><br><b>(μmole/min x mg protein)</b><br><b>(mean ± SEM)</b> | <b>P value</b> |
|-----|-------------------------------------------------|----------------|-----------------------------------------------------------------------|----------------|
| B6  | 3.397 ± 0.309                                   | 0.678          | 7.182 ± 1.461                                                         | 0.861          |
| C3H | 3.817 ± 0.862                                   |                | 7.714 ± 2.380                                                         |                |

*P* value was calculated by Student's *t*-test (two-tailed)

**Appendix Table S7. Demographic characteristics of postmortem brains (1<sup>st</sup> set).**

|                                 | <b>BA8</b>        |                      | <b><i>P</i> value</b> |
|---------------------------------|-------------------|----------------------|-----------------------|
|                                 | <b>Control</b>    | <b>Schizophrenia</b> |                       |
| N                               | 93                | 95                   |                       |
| Age at death (mean $\pm$ SD)    | 47.89 $\pm$ 16.62 | 45.92 $\pm$ 17.37    | 0.4281 <sup>a</sup>   |
| Sex (female/male)               | 20 / 73           | 25 / 70              | 0.4396 <sup>b</sup>   |
| Postmortem interval (hours)     | 41.78             | 41.71                | 0.9725 <sup>a</sup>   |
| Brain tissue pH (mean $\pm$ SD) | 6.33 $\pm$ 0.21   | 6.26 $\pm$ 0.25      | 0.0392 <sup>a</sup>   |

<sup>a</sup> Evaluated by Mann-Whitney *U* test (two-tailed)

<sup>b</sup> Evaluated by Fisher's exact test

**Appendix Table S8. Demographic characteristics of postmortem brains (2<sup>nd</sup> set).**

|                                 | BA17              |                   | <i>P</i> value      |
|---------------------------------|-------------------|-------------------|---------------------|
|                                 | Control           | Schizophrenia     |                     |
| N                               | 22                | 14                |                     |
| Age at death (mean $\pm$ SD)    | 63.05 $\pm$ 16.81 | 65.79 $\pm$ 12.07 | 0.9936 <sup>a</sup> |
| Sex (female/male)               | 8 / 14            | 5 / 9             | 0.9685 <sup>b</sup> |
| Postmortem interval (hours)     | 7.65              | 13.40             | 0.0055 <sup>a</sup> |
| Brain tissue pH (mean $\pm$ SD) | 6.33 $\pm$ 0.35   | 6.46 $\pm$ 0.40   | 0.5395 <sup>a</sup> |

<sup>a</sup> Evaluated by Mann-Whitney *U* test (two-tailed)

<sup>b</sup> Evaluated by Fisher's exact test

**Appendix Table S9. Demographic characteristics of peripheral blood sample set for *MPST* / *MPST* expression analyses.**

|                     | <b>Control</b>  | <b>Schizophrenia</b> | <b><i>P</i> value</b> |
|---------------------|-----------------|----------------------|-----------------------|
| N                   | 56              | 44                   |                       |
| Sex (female/male)   | 26 / 30         | 21 / 23              | 1.00 <sup>a</sup>     |
| Age (mean $\pm$ SD) | 46.8 $\pm$ 13.3 | 49.2 $\pm$ 2.0       | 0.41 <sup>b</sup>     |

<sup>a</sup> Evaluated by Fisher's exact test

<sup>b</sup> Evaluated by Mann-Whitney's *U* test (two-tailed)

**Appendix Table S10. Demographic characteristics of hair follicle sample set.**

|                     | <b>Control</b>    | <b>Schizophrenia</b> | <b><i>P</i> value</b> |
|---------------------|-------------------|----------------------|-----------------------|
| N                   | 166               | 149                  |                       |
| Sex (female/male)   | 105 / 61          | 67 / 82              | 0.0011 <sup>a</sup>   |
| Age (mean $\pm$ SD) | 43.72 $\pm$ 14.02 | 46.58 $\pm$ 11.67    | 0.0515 <sup>b</sup>   |

<sup>a</sup> Evaluated by Fisher's exact test

<sup>b</sup> Evaluated by Mann-Whitney's *U* test (two-tailed)

**Appendix Table S11. Differentially expressed genes from the frontal cortex of *Mpst* KO mouse.**

| Refseq_ID    | Gene                 | Log <sub>2</sub> fold change | P value     | Regulation            |
|--------------|----------------------|------------------------------|-------------|-----------------------|
| NM_001285913 | <i>Cdh8</i>          | -6.23587353                  | 0.014846654 | Mpst_KO_downregulated |
| NM_001302258 | <i>Pmp22</i>         | -6.105512243                 | 0.026291167 | Mpst_KO_downregulated |
| NM_153089    | <i>Ppp1r16b</i>      | -6.102283612                 | 0.001963833 | Mpst_KO_downregulated |
| NM_177942    | <i>Ece2</i>          | -5.992666442                 | 0.026775943 | Mpst_KO_downregulated |
| NM_001159641 | <i>Tasp1</i>         | -5.442536439                 | 0.045575681 | Mpst_KO_downregulated |
| NM_001130184 | <i>Jade1</i>         | -4.639623752                 | 0.037046995 | Mpst_KO_downregulated |
| NM_001177937 | <i>Eda</i>           | -4.321802399                 | 0.049442503 | Mpst_KO_downregulated |
| NR_073122    | <i>Ube2w</i>         | -1.362218267                 | 0.015523558 | Mpst_KO_downregulated |
| NM_001276443 | <i>Gpr155</i>        | -1.177181124                 | 0.029453946 | Mpst_KO_downregulated |
| NM_001164402 | <i>Ptpro</i>         | -1.173565019                 | 0.009829531 | Mpst_KO_downregulated |
| NM_144863    | <i>Wdr36</i>         | -1.133053829                 | 0.024179137 | Mpst_KO_downregulated |
| NM_001271390 | <i>Ankra2</i>        | -1.120801588                 | 0.017103603 | Mpst_KO_downregulated |
| NM_001286382 | <i>Vkorc11l</i>      | -1.013175544                 | 0.021788154 | Mpst_KO_downregulated |
| NM_009021    | <i>Rai1</i>          | -1.003560686                 | 0.006630548 | Mpst_KO_downregulated |
| NR_040592    | <i>I700030L20Rik</i> | -0.992903115                 | 0.01340516  | Mpst_KO_downregulated |
| NM_001164818 | <i>Aar2</i>          | -0.981498949                 | 0.045486891 | Mpst_KO_downregulated |
| NM_001290381 | <i>Tjpt</i>          | -0.980082104                 | 0.006232284 | Mpst_KO_downregulated |
| NM_001166503 | <i>Slc39a11</i>      | -0.968001398                 | 0.021339603 | Mpst_KO_downregulated |
| NM_001162493 | <i>Mpst</i>          | -0.957182679                 | 0.000482652 | Mpst_KO_downregulated |
| NM_026531    | <i>Aen</i>           | -0.928076105                 | 0.008497835 | Mpst_KO_downregulated |
| NR_033133    | <i>Plscr3</i>        | -0.848688738                 | 0.022435396 | Mpst_KO_downregulated |
| NM_001293791 | <i>Ints10</i>        | -0.838876516                 | 0.005428147 | Mpst_KO_downregulated |
| NM_001177464 | <i>Zfp516</i>        | -0.814571084                 | 0.034663206 | Mpst_KO_downregulated |
| NM_009771    | <i>Btrc</i>          | -0.791687273                 | 0.033366242 | Mpst_KO_downregulated |
| NM_001001565 | <i>Chpf</i>          | -0.771705576                 | 0.025289854 | Mpst_KO_downregulated |
| NM_001001177 | <i>BC051142</i>      | -0.770299625                 | 0.008583959 | Mpst_KO_downregulated |
| NM_145502    | <i>Erlin1</i>        | -0.758629853                 | 0.025125398 | Mpst_KO_downregulated |
| NM_001085417 | <i>Zfp467</i>        | -0.755212502                 | 0.004085676 | Mpst_KO_downregulated |
| NM_001290646 | <i>Lhx2</i>          | -0.734263501                 | 0.007293286 | Mpst_KO_downregulated |
| NM_001291120 | <i>Epb4.11l</i>      | -0.711761529                 | 0.039330815 | Mpst_KO_downregulated |
| NM_001285455 | <i>Mapt</i>          | -0.698793497                 | 0.032504362 | Mpst_KO_downregulated |
| NM_021402    | <i>Ube2j2</i>        | -0.687852525                 | 0.011627977 | Mpst_KO_downregulated |
| NM_001290759 | <i>Tbc1d9b</i>       | -0.686859086                 | 0.047629404 | Mpst_KO_downregulated |
| NM_001109748 | <i>Tomm40</i>        | -0.654256076                 | 0.022642086 | Mpst_KO_downregulated |
| NR_027887    | <i>9430008C03Rik</i> | -0.637885147                 | 0.047377227 | Mpst_KO_downregulated |
| NM_175411    | <i>Fam118b</i>       | -0.627265302                 | 0.041810445 | Mpst_KO_downregulated |
| NM_177592    | <i>Tmem164</i>       | -0.610255872                 | 0.010807102 | Mpst_KO_downregulated |
| NM_001159717 | <i>Sept2</i>         | -0.60899063                  | 0.012974108 | Mpst_KO_downregulated |
| NM_172781    | <i>Klhl4</i>         | -0.607654397                 | 0.028538314 | Mpst_KO_downregulated |
| NM_001252522 | <i>Picalm</i>        | -0.602385072                 | 0.025739071 | Mpst_KO_downregulated |
| NM_001159537 | <i>Adcy3</i>         | -0.569844121                 | 7.69497E-05 | Mpst_KO_downregulated |
| NM_001042613 | <i>Sepp1</i>         | -0.556715013                 | 0.026151476 | Mpst_KO_downregulated |
| NR_028094    | <i>Rabggfb</i>       | -0.542969103                 | 0.01357672  | Mpst_KO_downregulated |
| NM_001145958 | <i>Crocc</i>         | -0.540718719                 | 0.005230673 | Mpst_KO_downregulated |
| NR_034030    | <i>Lins</i>          | -0.530655117                 | 0.038326974 | Mpst_KO_downregulated |
| NM_010135    | <i>Enah</i>          | -0.522406525                 | 0.004745659 | Mpst_KO_downregulated |
| NM_001164793 | <i>Polr2m</i>        | -0.520998789                 | 0.021607327 | Mpst_KO_downregulated |
| NM_025482    | <i>Tpd52l2</i>       | -0.520629766                 | 0.044386335 | Mpst_KO_downregulated |
| NM_001190718 | <i>Dcaf12l1</i>      | -0.519220739                 | 0.041296047 | Mpst_KO_downregulated |
| NM_008006    | <i>Fgf2</i>          | -0.504643013                 | 0.021896091 | Mpst_KO_downregulated |
| NM_001243192 | <i>Serpinc6a</i>     | -0.492700083                 | 0.04462934  | Mpst_KO_downregulated |
| NM_001177629 | <i>Grb10</i>         | -0.484762708                 | 0.020656967 | Mpst_KO_downregulated |
| NM_001113545 | <i>Lima1</i>         | -0.47809486                  | 0.02437217  | Mpst_KO_downregulated |
| NM_030017    | <i>Rdh12</i>         | -0.476251096                 | 0.032369638 | Mpst_KO_downregulated |
| NM_001164210 | <i>Sptssb</i>        | -0.455980547                 | 0.01040194  | Mpst_KO_downregulated |
| NM_001135019 | <i>Zfp266</i>        | -0.455430332                 | 0.041127765 | Mpst_KO_downregulated |
| NM_001193309 | <i>Morc4</i>         | -0.453968123                 | 0.019745648 | Mpst_KO_downregulated |

|              |                       |              |             |                       |
|--------------|-----------------------|--------------|-------------|-----------------------|
| NR_028364    | <i>Ai450353</i>       | -0.441123243 | 0.015359092 | Mpst_KO_downregulated |
| NM_010160    | <i>Celf2</i>          | -0.437520424 | 0.022036306 | Mpst_KO_downregulated |
| NM_009614    | <i>Adam15</i>         | -0.434161104 | 0.034528361 | Mpst_KO_downregulated |
| NM_145841    | <i>Sgez</i>           | -0.430360252 | 0.018260172 | Mpst_KO_downregulated |
| NM_001201389 | <i>Gm11128</i>        | -0.427298741 | 0.022202865 | Mpst_KO_downregulated |
| NM_026563    | <i>Sdcccag3</i>       | -0.423154666 | 0.047799568 | Mpst_KO_downregulated |
| NM_018887    | <i>Cyp39a1</i>        | -0.421058978 | 0.039841216 | Mpst_KO_downregulated |
| NM_001242944 | <i>Gm14306</i>        | -0.419671136 | 0.00224154  | Mpst_KO_downregulated |
| NM_177025    | <i>Cobll1</i>         | -0.415225995 | 0.033525279 | Mpst_KO_downregulated |
| NM_001286986 | <i>Dram2</i>          | -0.409485571 | 0.046709736 | Mpst_KO_downregulated |
| NM_001168516 | <i>Zdhhc24</i>        | -0.403223036 | 0.030945381 | Mpst_KO_downregulated |
| NM_024464    | <i>Pigx</i>           | -0.399626329 | 0.029431399 | Mpst_KO_downregulated |
| NM_001286468 | <i>Arhgap24</i>       | -0.398083403 | 0.041776124 | Mpst_KO_downregulated |
| NR_103516    | <i>Ndufa7</i>         | -0.390041618 | 0.020352604 | Mpst_KO_downregulated |
| NM_001159610 | <i>Lrrc57</i>         | -0.387085361 | 0.005125789 | Mpst_KO_downregulated |
| NM_011665    | <i>Ube2i</i>          | -0.386684985 | 0.044724301 | Mpst_KO_downregulated |
| NM_153787    | <i>Bclaf1</i>         | -0.384267593 | 0.014822288 | Mpst_KO_downregulated |
| NR_033121    | <i>Gm10409</i>        | -0.372236304 | 0.040792895 | Mpst_KO_downregulated |
| NM_172485    | <i>Thsd7b</i>         | -0.369527317 | 0.046749974 | Mpst_KO_downregulated |
| NR_033121    | <i>Gm10409</i>        | -0.368911    | 0.042190381 | Mpst_KO_downregulated |
| NM_001163579 | <i>Lrrcc1</i>         | -0.368139183 | 0.024334664 | Mpst_KO_downregulated |
| NM_001190385 | <i>Caly</i>           | -0.367647337 | 0.039875471 | Mpst_KO_downregulated |
| NM_176839    | <i>Abcc5</i>          | -0.3608101   | 0.040074896 | Mpst_KO_downregulated |
| NM_177786    | <i>Depdc5</i>         | -0.356018236 | 0.00689278  | Mpst_KO_downregulated |
| NR_033198    | <i>2700046G09Rik</i>  | -0.355362997 | 0.007595826 | Mpst_KO_downregulated |
| NM_001290734 | <i>Osbpl6</i>         | -0.351549636 | 0.040349095 | Mpst_KO_downregulated |
| NM_001270842 | <i>Gm3558</i>         | -0.333004397 | 0.030668194 | Mpst_KO_downregulated |
| NR_045297    | <i>Gm17644</i>        | -0.327078574 | 0.045876274 | Mpst_KO_downregulated |
| NM_001033148 | <i>1700029J07Rik</i>  | -0.325335147 | 0.009462913 | Mpst_KO_downregulated |
| NM_001166360 | <i>6030458C11Rik</i>  | -0.314385605 | 0.017396037 | Mpst_KO_downregulated |
| NM_170671    | <i>Mychpap</i>        | -0.311594642 | 0.025115027 | Mpst_KO_downregulated |
| NM_001163473 | <i>1810010H24Rik</i>  | -0.307962095 | 0.044218927 | Mpst_KO_downregulated |
| NM_001082412 | <i>Slc25a53</i>       | -0.304838389 | 0.0423498   | Mpst_KO_downregulated |
| NM_173187    | <i>2310035C23Rik</i>  | -0.303350163 | 0.032227654 | Mpst_KO_downregulated |
| NM_001302443 | <i>Cdc37l1</i>        | -0.297180229 | 0.043541264 | Mpst_KO_downregulated |
| NM_001256065 | <i>Gm5141</i>         | -0.296751606 | 0.001658411 | Mpst_KO_downregulated |
| NM_013649    | <i>Ryk</i>            | -0.295909516 | 0.036671804 | Mpst_KO_downregulated |
| NM_001171801 | <i>Triqk</i>          | -0.294216765 | 0.035938819 | Mpst_KO_downregulated |
| NM_001285427 | <i>Cacnb4</i>         | -0.29331462  | 0.035090145 | Mpst_KO_downregulated |
| NM_011972    | <i>Poli</i>           | -0.288374617 | 0.025606733 | Mpst_KO_downregulated |
| NM_144792    | <i>Sgms1</i>          | -0.286165509 | 0.029220924 | Mpst_KO_downregulated |
| NM_001163025 | <i>Mon2</i>           | -0.282617202 | 0.040683824 | Mpst_KO_downregulated |
| NM_001114679 | <i>9930111J21Rik1</i> | -0.269418064 | 0.006200964 | Mpst_KO_downregulated |
| NM_134074    | <i>Dock9</i>          | -0.266261871 | 0.007677532 | Mpst_KO_downregulated |
| NR_073587    | <i>Tysnd1</i>         | -0.258745256 | 0.026634559 | Mpst_KO_downregulated |
| NM_172600    | <i>Tmem260</i>        | -0.25866209  | 0.008187218 | Mpst_KO_downregulated |
| NR_037988    | <i>Gm16701</i>        | -0.257503403 | 0.02509985  | Mpst_KO_downregulated |
| NM_001038696 | <i>Rnpc3</i>          | -0.256127248 | 0.036172066 | Mpst_KO_downregulated |
| NM_172126    | <i>Adam1a</i>         | -0.25390598  | 0.042386615 | Mpst_KO_downregulated |
| NM_001285827 | <i>Ppil3</i>          | -0.250201833 | 0.035581637 | Mpst_KO_downregulated |
| NM_001163522 | <i>Emcn</i>           | -0.250150419 | 0.001095816 | Mpst_KO_downregulated |
| NM_183185    | <i>Zfp300</i>         | -0.248133355 | 0.041938807 | Mpst_KO_downregulated |
| NM_001093775 | <i>Myt1l</i>          | -0.24466743  | 0.010145872 | Mpst_KO_downregulated |
| NM_026507    | <i>Zwilch</i>         | -0.243210107 | 0.026360227 | Mpst_KO_downregulated |
| NM_152801    | <i>Arhgef6</i>        | -0.241669848 | 0.02737191  | Mpst_KO_downregulated |
| NM_178164    | <i>Ptbp3</i>          | -0.236806431 | 0.023613513 | Mpst_KO_downregulated |
| NM_019829    | <i>Six5a</i>          | -0.236093819 | 0.009582653 | Mpst_KO_downregulated |
| NM_001164676 | <i>Zfp229</i>         | -0.235434462 | 0.034292206 | Mpst_KO_downregulated |
| NM_001033123 | <i>Gm14288</i>        | -0.231812079 | 0.014475971 | Mpst_KO_downregulated |
| NM_001001333 | <i>Hexdc</i>          | -0.23124103  | 0.023977971 | Mpst_KO_downregulated |
| NM_026041    | <i>Rpl15</i>          | -0.229935376 | 0.032536158 | Mpst_KO_downregulated |
| NM_001048204 | <i>Zfp455</i>         | -0.227833946 | 0.03651193  | Mpst_KO_downregulated |

|              |                      |              |             |                       |
|--------------|----------------------|--------------|-------------|-----------------------|
| NM_023873    | <i>Cep70</i>         | -0.225246758 | 0.009804271 | Mpst_KO_downregulated |
| NM_001033123 | <i>Gm14288</i>       | -0.221154965 | 0.021165518 | Mpst_KO_downregulated |
| NM_025465    | <i>Tma16</i>         | -0.220748084 | 0.005647554 | Mpst_KO_downregulated |
| NR_015505    | <i>Firre</i>         | -0.220041827 | 0.044193512 | Mpst_KO_downregulated |
| NM_001205371 | <i>Casc4</i>         | -0.21974807  | 0.038289415 | Mpst_KO_downregulated |
| NM_001284504 | <i>Casc</i>          | -0.218611723 | 0.045972619 | Mpst_KO_downregulated |
| NM_017368    | <i>Celf1</i>         | -0.218428959 | 0.012692375 | Mpst_KO_downregulated |
| NM_175193    | <i>Golim4</i>        | -0.216055966 | 0.041698004 | Mpst_KO_downregulated |
| NM_030715    | <i>Polh</i>          | -0.214793575 | 0.015772793 | Mpst_KO_downregulated |
| NM_001159290 | <i>Bcl11a</i>        | -0.21106365  | 0.015556406 | Mpst_KO_downregulated |
| NM_133240    | <i>Acof8</i>         | -0.21039478  | 0.041769726 | Mpst_KO_downregulated |
| NM_053263    | <i>Hnrnpa3</i>       | -0.207730692 | 0.027511711 | Mpst_KO_downregulated |
| NM_008921    | <i>Prim1</i>         | -0.206398303 | 0.047317316 | Mpst_KO_downregulated |
| NM_001164254 | <i>Tpm1</i>          | -0.201216111 | 0.046702924 | Mpst_KO_downregulated |
| NM_177429    | <i>Ofd1</i>          | -0.198419366 | 0.048912534 | Mpst_KO_downregulated |
| NM_001174074 | <i>Celf4</i>         | -0.197967834 | 0.028028356 | Mpst_KO_downregulated |
| NM_001081009 | <i>Parp8</i>         | -0.196875592 | 0.013033261 | Mpst_KO_downregulated |
| NM_001256380 | <i>Prdm2</i>         | -0.196176376 | 0.024153253 | Mpst_KO_downregulated |
| NM_001033123 | <i>Gm14288</i>       | -0.188686979 | 0.020511325 | Mpst_KO_downregulated |
| NM_026467    | <i>Rps271</i>        | -0.188171982 | 0.016639667 | Mpst_KO_downregulated |
| NM_178337    | <i>Tbce</i>          | -0.187974846 | 0.015139522 | Mpst_KO_downregulated |
| NM_010933    | <i>Nppc</i>          | -0.187290694 | 0.04632846  | Mpst_KO_downregulated |
| NM_007616    | <i>Cav1</i>          | -0.185553928 | 0.046270899 | Mpst_KO_downregulated |
| NM_001045525 | <i>Cyb5d1</i>        | -0.183061149 | 0.049611441 | Mpst_KO_downregulated |
| NM_173022    | <i>BC048403</i>      | -0.176713591 | 0.026816439 | Mpst_KO_downregulated |
| NR_030708    | <i>6820431F20Rik</i> | -0.174340481 | 0.016715898 | Mpst_KO_downregulated |
| NM_025716    | <i>Spryd4</i>        | -0.174044531 | 0.048916111 | Mpst_KO_downregulated |
| NM_001290741 | <i>Cnot6</i>         | -0.172631269 | 0.034572    | Mpst_KO_downregulated |
| NM_019864    | <i>Atr</i>           | -0.172389604 | 0.009559364 | Mpst_KO_downregulated |
| NM_175277    | <i>Bola3</i>         | -0.171274667 | 0.046284542 | Mpst_KO_downregulated |
| NM_001290414 | <i>Fgf13</i>         | -0.16977547  | 0.047300181 | Mpst_KO_downregulated |
| NM_001284373 | <i>Atf2</i>          | -0.166616005 | 0.024718468 | Mpst_KO_downregulated |
| NM_145618    | <i>Ice2</i>          | -0.166291129 | 0.017107267 | Mpst_KO_downregulated |
| NM_028479    | <i>Mrgbp</i>         | -0.165589819 | 0.035217685 | Mpst_KO_downregulated |
| NM_001243908 | <i>Zfp383</i>        | -0.165093033 | 0.025421922 | Mpst_KO_downregulated |
| NM_178643    | <i>C230052112Rik</i> | -0.162241421 | 0.027688055 | Mpst_KO_downregulated |
| NM_145960    | <i>Mtrf1</i>         | -0.161470817 | 0.023847837 | Mpst_KO_downregulated |
| NM_022986    | <i>Irak1bp1</i>      | -0.159557531 | 0.00852654  | Mpst_KO_downregulated |
| NM_173406    | <i>Jazf1</i>         | -0.157652625 | 0.002049917 | Mpst_KO_downregulated |
| NM_013851    | <i>Abca8b</i>        | -0.156682996 | 0.044288179 | Mpst_KO_downregulated |
| NM_025380    | <i>Eef1e1</i>        | -0.155773609 | 0.011183076 | Mpst_KO_downregulated |
| NM_001081252 | <i>Uggf2</i>         | -0.152676162 | 0.017439817 | Mpst_KO_downregulated |
| NM_001160222 | <i>Pum2</i>          | -0.152325734 | 0.00959215  | Mpst_KO_downregulated |
| NM_019653    | <i>Wsb1</i>          | -0.152049509 | 0.018981255 | Mpst_KO_downregulated |
| NM_175313    | <i>Eogt</i>          | -0.144385513 | 0.047197553 | Mpst_KO_downregulated |
| NM_001142963 | <i>Gm10778</i>       | -0.142388809 | 0.020657994 | Mpst_KO_downregulated |
| NM_026810    | <i>Mlh1</i>          | -0.140941408 | 0.035161526 | Mpst_KO_downregulated |
| NM_008861    | <i>Pkd2</i>          | -0.140848551 | 0.038025044 | Mpst_KO_downregulated |
| NM_145607    | <i>Ttc13</i>         | -0.140596036 | 0.020132303 | Mpst_KO_downregulated |
| NM_001285901 | <i>Eri3</i>          | -0.140512762 | 0.036494654 | Mpst_KO_downregulated |
| NM_001110017 | <i>Dzip3</i>         | -0.139860574 | 0.043456893 | Mpst_KO_downregulated |
| NM_178411    | <i>Zfp334</i>        | -0.139593458 | 0.014716434 | Mpst_KO_downregulated |
| NM_133786    | <i>Smc4</i>          | -0.139433007 | 0.014708963 | Mpst_KO_downregulated |
| NM_026331    | <i>Slc25a37</i>      | -0.138532187 | 0.02736555  | Mpst_KO_downregulated |
| NM_175175    | <i>Plekhh2</i>       | -0.138287223 | 0.035192832 | Mpst_KO_downregulated |
| NM_021540    | <i>Rnf130</i>        | -0.137943545 | 0.026245889 | Mpst_KO_downregulated |
| NM_027869    | <i>Npnt1</i>         | -0.136782789 | 0.001172854 | Mpst_KO_downregulated |
| NM_133691    | <i>Puf60</i>         | -0.136047018 | 0.043862697 | Mpst_KO_downregulated |
| NM_145125    | <i>Brwd1</i>         | -0.13564318  | 0.003690863 | Mpst_KO_downregulated |
| NM_153552    | <i>Thoc1</i>         | -0.13460342  | 0.012963656 | Mpst_KO_downregulated |
| NM_001199485 | <i>4931406C07Rik</i> | -0.13283695  | 0.021787796 | Mpst_KO_downregulated |
| NM_173760    | <i>Ppip5k2</i>       | -0.130526531 | 0.015161102 | Mpst_KO_downregulated |



|              |                      |              |             |                       |
|--------------|----------------------|--------------|-------------|-----------------------|
| NM_173765    | <i>Aasdh</i>         | -0.130201815 | 0.044368895 | Mpst_KO_downregulated |
| NM_026604    | <i>Fam135a</i>       | -0.130110923 | 0.036322907 | Mpst_KO_downregulated |
| NM_001252209 | <i>Kcnj16</i>        | -0.126957104 | 0.026391106 | Mpst_KO_downregulated |
| NM_134071    | <i>Ankrd32</i>       | -0.126006614 | 0.037241081 | Mpst_KO_downregulated |
| NM_010067    | <i>Trdnt1</i>        | -0.125874793 | 0.016333455 | Mpst_KO_downregulated |
| NM_024270    | <i>Stard3nl</i>      | -0.125782653 | 0.010218188 | Mpst_KO_downregulated |
| NM_009383    | <i>Tial1</i>         | -0.125544551 | 0.02937188  | Mpst_KO_downregulated |
| NM_011419    | <i>Kdm5d</i>         | -0.125499925 | 0.007184957 | Mpst_KO_downregulated |
| NM_172713    | <i>Sdad1</i>         | -0.125016677 | 0.046455804 | Mpst_KO_downregulated |
| NM_008577    | <i>Slc3a2</i>        | -0.124681526 | 0.02298314  | Mpst_KO_downregulated |
| NM_033476    | <i>Tfcp2</i>         | -0.124013499 | 0.026491301 | Mpst_KO_downregulated |
| NM_175552    | <i>Wdr3</i>          | -0.123208555 | 0.042534818 | Mpst_KO_downregulated |
| NM_001167988 | <i>Taf9b</i>         | -0.12202086  | 0.029495348 | Mpst_KO_downregulated |
| NM_001007575 | <i>Zfp58</i>         | -0.119812324 | 0.041834966 | Mpst_KO_downregulated |
| NR_033535    | <i>Gm10845</i>       | -0.119047526 | 0.039050876 | Mpst_KO_downregulated |
| NM_029344    | <i>Acp2</i>          | -0.11856191  | 0.037201488 | Mpst_KO_downregulated |
| NM_144925    | <i>Tnrc6a</i>        | -0.117183459 | 0.046885785 | Mpst_KO_downregulated |
| NM_001162945 | <i>Mtx3</i>          | -0.116675911 | 0.013682705 | Mpst_KO_downregulated |
| NM_025748    | <i>Adat2</i>         | -0.114738626 | 0.045939113 | Mpst_KO_downregulated |
| NM_175090    | <i>Slc31a1</i>       | -0.112145508 | 0.042682666 | Mpst_KO_downregulated |
| NM_012061    | <i>Cadps</i>         | -0.11097458  | 0.029152134 | Mpst_KO_downregulated |
| NM_173444    | <i>Nbeal1</i>        | -0.110192054 | 0.031920796 | Mpst_KO_downregulated |
| NM_013784    | <i>Pign</i>          | -0.106145692 | 0.046973421 | Mpst_KO_downregulated |
| NM_138756    | <i>Slc25a36</i>      | -0.105543764 | 0.022920203 | Mpst_KO_downregulated |
| NM_178625    | <i>Tmem209</i>       | -0.103623388 | 0.018326773 | Mpst_KO_downregulated |
| NM_028315    | <i>Dis3</i>          | -0.103506871 | 0.025804873 | Mpst_KO_downregulated |
| NM_011247    | <i>Rbbp6</i>         | -0.102954617 | 0.031109605 | Mpst_KO_downregulated |
| NM_026343    | <i>Stx17</i>         | -0.102461439 | 0.024525451 | Mpst_KO_downregulated |
| NM_026499    | <i>Srsf6</i>         | -0.100313122 | 0.010608554 | Mpst_KO_downregulated |
| NM_172807    | <i>Ppwd1</i>         | -0.096900588 | 0.034667344 | Mpst_KO_downregulated |
| NM_175480    | <i>Zfp612</i>        | -0.091135679 | 0.046671474 | Mpst_KO_downregulated |
| NM_016799    | <i>Srrm1</i>         | -0.090231489 | 0.040978535 | Mpst_KO_downregulated |
| NM_001081022 | <i>D430042O09Rik</i> | -0.089466888 | 0.020971566 | Mpst_KO_downregulated |
| NM_172671    | <i>Lgr4</i>          | -0.089287703 | 0.045202272 | Mpst_KO_downregulated |
| NM_145968    | <i>Tagap</i>         | -0.088973771 | 0.042458267 | Mpst_KO_downregulated |
| NM_026609    | <i>Leprotl1</i>      | -0.087426735 | 0.002710459 | Mpst_KO_downregulated |
| NM_028248    | <i>Tmem87b</i>       | -0.08739308  | 0.04630087  | Mpst_KO_downregulated |
| NM_027421    | <i>Ints2</i>         | -0.084987288 | 0.045986733 | Mpst_KO_downregulated |
| NM_008971    | <i>Twf1</i>          | -0.084669426 | 0.039864058 | Mpst_KO_downregulated |
| NM_029658    | <i>Fam101b</i>       | -0.084185372 | 0.007797617 | Mpst_KO_downregulated |
| NM_009461    | <i>Ubr1</i>          | -0.08071835  | 0.029405357 | Mpst_KO_downregulated |
| NM_027264    | <i>Zfp715</i>        | -0.078788706 | 0.015580897 | Mpst_KO_downregulated |
| NM_198033    | <i>Setx</i>          | -0.078103636 | 0.034557314 | Mpst_KO_downregulated |
| NM_027530    | <i>Rufy3</i>         | -0.077434346 | 0.040801935 | Mpst_KO_downregulated |
| NM_009360    | <i>Tfam</i>          | -0.076993977 | 0.016902505 | Mpst_KO_downregulated |
| NM_028731    | <i>Esys2</i>         | -0.075687661 | 0.015010662 | Mpst_KO_downregulated |
| NM_011358    | <i>Srsf2</i>         | -0.075665193 | 0.033668585 | Mpst_KO_downregulated |
| NM_011890    | <i>Sgcb</i>          | -0.070010119 | 0.009875574 | Mpst_KO_downregulated |
| NM_177139    | <i>Lypd6</i>         | -0.070001536 | 0.04325906  | Mpst_KO_downregulated |
| NM_008917    | <i>Ppt1</i>          | -0.065967048 | 0.040356733 | Mpst_KO_downregulated |
| NM_001164101 | <i>Add3</i>          | -0.065904627 | 0.026990325 | Mpst_KO_downregulated |
| NM_010832    | <i>Msl3</i>          | -0.065805587 | 0.029839382 | Mpst_KO_downregulated |
| NM_133679    | <i>Cryz11</i>        | -0.064271777 | 0.044048967 | Mpst_KO_downregulated |
| NM_027472    | <i>5730455P16Rik</i> | -0.063920244 | 0.038993531 | Mpst_KO_downregulated |
| NM_001045536 | <i>Zzef1</i>         | -0.058059865 | 0.044714452 | Mpst_KO_downregulated |
| NM_011946    | <i>Map3k2</i>        | -0.055432289 | 0.044758201 | Mpst_KO_downregulated |
| NM_172585    | <i>Larp4b</i>        | -0.052590255 | 0.049348847 | Mpst_KO_downregulated |
| NM_178880    | <i>Son</i>           | -0.049776844 | 0.041758831 | Mpst_KO_downregulated |
| NM_018872    | <i>Tmem131</i>       | -0.049565841 | 0.021331754 | Mpst_KO_downregulated |
| NM_011714    | <i>Baz1b</i>         | -0.039389459 | 0.009723668 | Mpst_KO_downregulated |
| NM_027315    | <i>Ube2q1</i>        | 0.034544346  | 0.046595465 | Mpst_KO_upregulated   |
| NM_009005    | <i>Rab7</i>          | 0.048040143  | 0.040512798 | Mpst_KO_upregulated   |

|              |                      |             |             |                     |
|--------------|----------------------|-------------|-------------|---------------------|
| NM_028860    | <i>Mmr3</i>          | 0.053583175 | 0.033142308 | Mpst_KO_upregulated |
| NM_001013380 | <i>Dync1li2</i>      | 0.054525638 | 0.020897409 | Mpst_KO_upregulated |
| NM_001080932 | <i>Foxk2</i>         | 0.061479516 | 0.03601024  | Mpst_KO_upregulated |
| NM_019634    | <i>Tspan7</i>        | 0.062827297 | 0.011286511 | Mpst_KO_upregulated |
| NM_011416    | <i>Smarca2</i>       | 0.06488185  | 0.040498054 | Mpst_KO_upregulated |
| NM_177267    | <i>Dcaf5</i>         | 0.065756697 | 0.041933293 | Mpst_KO_upregulated |
| NM_033526    | <i>Ubqln4</i>        | 0.067836942 | 0.035540869 | Mpst_KO_upregulated |
| NM_144518    | <i>2900011008Rik</i> | 0.068265975 | 0.04900675  | Mpst_KO_upregulated |
| NM_175930    | <i>Rapgef5</i>       | 0.069342218 | 0.027136216 | Mpst_KO_upregulated |
| NM_010357    | <i>Gsta4</i>         | 0.070187651 | 0.032950598 | Mpst_KO_upregulated |
| NM_013681    | <i>Syn2</i>          | 0.070906899 | 0.010036049 | Mpst_KO_upregulated |
| NM_009142    | <i>Cx3cl1</i>        | 0.07191687  | 0.047634909 | Mpst_KO_upregulated |
| NM_001102455 | <i>Aplp2</i>         | 0.073742847 | 0.046296384 | Mpst_KO_upregulated |
| NM_001080930 | <i>Atxn11</i>        | 0.073908652 | 0.018448602 | Mpst_KO_upregulated |
| NM_001033463 | <i>Tatdn2</i>        | 0.075544184 | 0.027980132 | Mpst_KO_upregulated |
| NM_008395    | <i>Ich</i>           | 0.07618967  | 0.040081874 | Mpst_KO_upregulated |
| NM_174998    | <i>Hpcal4</i>        | 0.07737377  | 0.036365676 | Mpst_KO_upregulated |
| NM_026519    | <i>Emc4</i>          | 0.078174741 | 0.025075754 | Mpst_KO_upregulated |
| NM_175164    | <i>Arhgap26</i>      | 0.079345986 | 0.029328233 | Mpst_KO_upregulated |
| NM_010885    | <i>Ndufa2</i>        | 0.0815374   | 0.039350795 | Mpst_KO_upregulated |
| NM_001040106 | <i>Aak1</i>          | 0.084061294 | 0.032615978 | Mpst_KO_upregulated |
| NM_170755    | <i>Fam134a</i>       | 0.084927145 | 0.04084514  | Mpst_KO_upregulated |
| NM_009136    | <i>Scrg1</i>         | 0.087322712 | 0.020822555 | Mpst_KO_upregulated |
| NM_001163425 | <i>Myeov2</i>        | 0.088729878 | 0.045813459 | Mpst_KO_upregulated |
| NM_021539    | <i>Wsb2</i>          | 0.090241597 | 0.043011187 | Mpst_KO_upregulated |
| NM_134091    | <i>Sgsm3</i>         | 0.095407612 | 0.024775525 | Mpst_KO_upregulated |
| NM_033583    | <i>Pcdhgc5</i>       | 0.097865379 | 0.029542529 | Mpst_KO_upregulated |
| NM_133665    | <i>Mef2d</i>         | 0.100652022 | 0.030221325 | Mpst_KO_upregulated |
| NM_153134    | <i>Irgq</i>          | 0.102342607 | 0.0160296   | Mpst_KO_upregulated |
| NM_021393    | <i>Nelfb</i>         | 0.103002813 | 0.045950326 | Mpst_KO_upregulated |
| NM_001146174 | <i>Rangap1</i>       | 0.103472416 | 0.011391914 | Mpst_KO_upregulated |
| NM_007805    | <i>Cyb56l</i>        | 0.103758381 | 0.03735946  | Mpst_KO_upregulated |
| NM_008948    | <i>Psmc3</i>         | 0.103762084 | 0.04375182  | Mpst_KO_upregulated |
| NM_026615    | <i>Urm1</i>          | 0.104422901 | 0.010457626 | Mpst_KO_upregulated |
| NM_183315    | <i>Cxcl1</i>         | 0.105960558 | 0.022592669 | Mpst_KO_upregulated |
| NM_175402    | <i>Rbm15b</i>        | 0.105972409 | 0.042899217 | Mpst_KO_upregulated |
| NM_025544    | <i>Mrps15</i>        | 0.109902573 | 0.04526553  | Mpst_KO_upregulated |
| NM_029219    | <i>Rnf19b</i>        | 0.110342199 | 0.037772845 | Mpst_KO_upregulated |
| NM_080559    | <i>Sh3bgrl3</i>      | 0.110451761 | 0.006067902 | Mpst_KO_upregulated |
| NM_012014    | <i>Gprin1</i>        | 0.111623305 | 0.04784855  | Mpst_KO_upregulated |
| NM_019661    | <i>Yk6</i>           | 0.111998349 | 0.016647058 | Mpst_KO_upregulated |
| NM_053177    | <i>Mcoln1</i>        | 0.113404596 | 0.033885075 | Mpst_KO_upregulated |
| NM_025808    | <i>Lztr1</i>         | 0.115809293 | 0.036752544 | Mpst_KO_upregulated |
| NM_019392    | <i>Tyro3</i>         | 0.116598311 | 0.048841079 | Mpst_KO_upregulated |
| NM_011431    | <i>Ejfad2</i>        | 0.117989704 | 0.02471878  | Mpst_KO_upregulated |
| NM_025500    | <i>Mrpl37</i>        | 0.119804632 | 0.030649017 | Mpst_KO_upregulated |
| NM_001081114 | <i>Clip3</i>         | 0.120397121 | 0.022070494 | Mpst_KO_upregulated |
| NM_001271487 | <i>Rtn3</i>          | 0.12062268  | 0.033839539 | Mpst_KO_upregulated |
| NM_144534    | <i>Tmem38a</i>       | 0.121202363 | 0.030418364 | Mpst_KO_upregulated |
| NM_001042451 | <i>Snca</i>          | 0.122557246 | 0.04630279  | Mpst_KO_upregulated |
| NM_148946    | <i>Sle8a2</i>        | 0.124643352 | 0.016784527 | Mpst_KO_upregulated |
| NM_023900    | <i>Plekhl1</i>       | 0.127625926 | 0.032003864 | Mpst_KO_upregulated |
| NM_028762    | <i>Rbm19</i>         | 0.128295202 | 0.021476098 | Mpst_KO_upregulated |
| NR_027372    | <i>Arhgap1</i>       | 0.129317022 | 0.038481053 | Mpst_KO_upregulated |
| NM_138601    | <i>D10Jhu81e</i>     | 0.131567262 | 0.029674995 | Mpst_KO_upregulated |
| NM_001109975 | <i>Synpo</i>         | 0.131751963 | 0.040834735 | Mpst_KO_upregulated |
| NM_001024717 | <i>Gal3st3</i>       | 0.1321672   | 0.01433959  | Mpst_KO_upregulated |
| NM_025421    | <i>Acyp1</i>         | 0.134651863 | 0.04718569  | Mpst_KO_upregulated |
| NM_001252639 | <i>Tbcd7</i>         | 0.135004962 | 0.029633528 | Mpst_KO_upregulated |
| NM_009164    | <i>Sh3bp1</i>        | 0.135474081 | 0.027513833 | Mpst_KO_upregulated |
| NR_045176    | <i>2810468N07Rik</i> | 0.135592017 | 0.04870288  | Mpst_KO_upregulated |
| NM_007698    | <i>Chrm1</i>         | 0.137778834 | 0.020835641 | Mpst_KO_upregulated |

|              |                      |             |             |                     |
|--------------|----------------------|-------------|-------------|---------------------|
| NM_011846    | <i>Mmp17</i>         | 0.13881991  | 0.013729962 | Mpst_KO_upregulated |
| NM_013622    | <i>Oprd1</i>         | 0.141536599 | 0.026673036 | Mpst_KO_upregulated |
| NM_172668    | <i>Lrp4</i>          | 0.141914834 | 0.035894922 | Mpst_KO_upregulated |
| NM_175154    | <i>Galk2</i>         | 0.142864434 | 0.036722795 | Mpst_KO_upregulated |
| NM_001081227 | <i>6330403A02Rik</i> | 0.143226705 | 0.012408208 | Mpst_KO_upregulated |
| NM_024461    | <i>I810037117Rik</i> | 0.144255104 | 0.010460654 | Mpst_KO_upregulated |
| NM_001252332 | <i>Sept8</i>         | 0.144876407 | 0.043292757 | Mpst_KO_upregulated |
| NM_001001566 | <i>Chpf</i>          | 0.145624147 | 0.020577689 | Mpst_KO_upregulated |
| NM_011228    | <i>Rab33a</i>        | 0.146482598 | 0.036971615 | Mpst_KO_upregulated |
| NM_029609    | <i>Lhpp</i>          | 0.148592872 | 0.037442937 | Mpst_KO_upregulated |
| NM_001134383 | <i>Iqsec1</i>        | 0.152275106 | 0.03838609  | Mpst_KO_upregulated |
| NM_001037758 | <i>Birc</i>          | 0.152449665 | 0.0259189   | Mpst_KO_upregulated |
| NM_009000    | <i>Rab24</i>         | 0.153078383 | 0.013834317 | Mpst_KO_upregulated |
| NM_207225    | <i>Hdac4</i>         | 0.153086063 | 0.032423333 | Mpst_KO_upregulated |
| NM_019800    | <i>Acp6</i>          | 0.153541019 | 0.038161764 | Mpst_KO_upregulated |
| NM_170777    | <i>Elof1</i>         | 0.153657246 | 0.033852158 | Mpst_KO_upregulated |
| NM_153136    | <i>Nudt18</i>        | 0.153905744 | 0.042543742 | Mpst_KO_upregulated |
| NM_001085374 | <i>Mcc</i>           | 0.154875898 | 0.04221112  | Mpst_KO_upregulated |
| NM_012026    | <i>Arhgef28</i>      | 0.155338539 | 0.017920488 | Mpst_KO_upregulated |
| NM_026768    | <i>Mrps18a</i>       | 0.156266844 | 0.037482125 | Mpst_KO_upregulated |
| NM_026512    | <i>Bphil</i>         | 0.15726149  | 0.015146313 | Mpst_KO_upregulated |
| NM_001081456 | <i>Plcd4</i>         | 0.157686005 | 0.034071842 | Mpst_KO_upregulated |
| NM_008027    | <i>Flot1</i>         | 0.15845309  | 0.003527817 | Mpst_KO_upregulated |
| NM_029614    | <i>Prss23</i>        | 0.162023291 | 0.048234751 | Mpst_KO_upregulated |
| NM_199197    | <i>Rbfa</i>          | 0.162524105 | 0.013042923 | Mpst_KO_upregulated |
| NM_172630    | <i>Mppe1</i>         | 0.162771178 | 0.030259871 | Mpst_KO_upregulated |
| NM_001159640 | <i>Tasp1</i>         | 0.162793139 | 0.046078797 | Mpst_KO_upregulated |
| NM_144852    | <i>Slc7a4</i>        | 0.163483211 | 0.008836858 | Mpst_KO_upregulated |
| NM_001282127 | <i>Brpf1</i>         | 0.16692971  | 0.03234568  | Mpst_KO_upregulated |
| NM_026337    | <i>Sltm</i>          | 0.167820749 | 0.039302982 | Mpst_KO_upregulated |
| NM_027106    | <i>Avpi1</i>         | 0.168634661 | 0.047860056 | Mpst_KO_upregulated |
| NM_028364    | <i>Puf60</i>         | 0.169910458 | 0.041924032 | Mpst_KO_upregulated |
| NM_001173483 | <i>Rilbp1</i>        | 0.172081531 | 0.031649939 | Mpst_KO_upregulated |
| NM_001034013 | <i>Asic2</i>         | 0.174957214 | 0.047794891 | Mpst_KO_upregulated |
| NM_007656    | <i>Cd82</i>          | 0.177118952 | 0.047696503 | Mpst_KO_upregulated |
| NM_172758    | <i>Slc38a7</i>       | 0.178100079 | 0.029356723 | Mpst_KO_upregulated |
| NM_015773    | <i>Spag6</i>         | 0.179212886 | 0.012250364 | Mpst_KO_upregulated |
| NM_025870    | <i>Swsap1</i>        | 0.179370654 | 0.015846202 | Mpst_KO_upregulated |
| NM_010698    | <i>Ldb2</i>          | 0.179542924 | 0.048440035 | Mpst_KO_upregulated |
| NM_010108    | <i>Efna3</i>         | 0.180129572 | 0.027220359 | Mpst_KO_upregulated |
| NM_001167799 | <i>Six5a</i>         | 0.182078763 | 0.024146233 | Mpst_KO_upregulated |
| NM_138654    | <i>Sugct</i>         | 0.182824391 | 0.016691969 | Mpst_KO_upregulated |
| NM_001170567 | <i>Depdc5</i>        | 0.184246059 | 0.029763219 | Mpst_KO_upregulated |
| NM_028454    | <i>Tm7sf2</i>        | 0.185913004 | 0.034425348 | Mpst_KO_upregulated |
| NM_001164671 | <i>Dnaja1</i>        | 0.186275626 | 0.036682956 | Mpst_KO_upregulated |
| NM_145450    | <i>BC022687</i>      | 0.189327823 | 0.02785268  | Mpst_KO_upregulated |
| NM_029761    | <i>Dok5</i>          | 0.190011229 | 0.048794985 | Mpst_KO_upregulated |
| NM_001077495 | <i>Pik3r1</i>        | 0.191838029 | 0.002827016 | Mpst_KO_upregulated |
| NM_008812    | <i>Padi2</i>         | 0.200916256 | 0.027280851 | Mpst_KO_upregulated |
| NM_026345    | <i>Mansc1</i>        | 0.204467109 | 0.036837115 | Mpst_KO_upregulated |
| NM_181318    | <i>Rasgef1b</i>      | 0.207150071 | 0.047017449 | Mpst_KO_upregulated |
| NM_144849    | <i>Ankrd54</i>       | 0.207531287 | 0.033761012 | Mpst_KO_upregulated |
| NM_001033204 | <i>Rpusd3</i>        | 0.217811083 | 0.005406374 | Mpst_KO_upregulated |
| NM_018855    | <i>Gas8</i>          | 0.231716197 | 0.007553074 | Mpst_KO_upregulated |
| NM_001029933 | <i>Zfp114</i>        | 0.233186448 | 0.024800215 | Mpst_KO_upregulated |
| NR_033326    | <i>Gm5089</i>        | 0.237337688 | 0.044693813 | Mpst_KO_upregulated |
| NM_016762    | <i>Matn2</i>         | 0.238364887 | 0.009489848 | Mpst_KO_upregulated |
| NM_001025296 | <i>Dffa</i>          | 0.238878346 | 0.04343749  | Mpst_KO_upregulated |
| NM_001083320 | <i>Magi1</i>         | 0.239010574 | 0.023083876 | Mpst_KO_upregulated |
| NM_001171035 | <i>Tmbim6</i>        | 0.240938977 | 0.046231938 | Mpst_KO_upregulated |
| NM_010187    | <i>Fcgr2b</i>        | 0.242641859 | 0.026696696 | Mpst_KO_upregulated |
| NM_029602    | <i>Znrd1as</i>       | 0.246832168 | 0.006983127 | Mpst_KO_upregulated |

|              |                      |             |             |                     |
|--------------|----------------------|-------------|-------------|---------------------|
| NM_001166430 | <i>Hnrnpf</i>        | 0.247127109 | 0.029186132 | Mpst_KO_upregulated |
| NM_001289685 | <i>Iqsec3</i>        | 0.249295789 | 0.038745499 | Mpst_KO_upregulated |
| NM_029628    | <i>Ppp1r3g</i>       | 0.254364679 | 0.013846455 | Mpst_KO_upregulated |
| NM_023240    | <i>Eef1d</i>         | 0.258665072 | 0.047607417 | Mpst_KO_upregulated |
| NM_053122    | <i>Immp2l</i>        | 0.262702753 | 0.029843856 | Mpst_KO_upregulated |
| NM_001291052 | <i>Gpcpd1</i>        | 0.26394704  | 0.008778419 | Mpst_KO_upregulated |
| NM_025649    | <i>Mad211bp</i>      | 0.26599702  | 0.013133248 | Mpst_KO_upregulated |
| NM_172546    | <i>Cnksr3</i>        | 0.269339546 | 0.009739513 | Mpst_KO_upregulated |
| NM_001145950 | <i>5730409E04Rik</i> | 0.271080035 | 0.00732188  | Mpst_KO_upregulated |
| NM_001111288 | <i>Sco2</i>          | 0.273767057 | 0.045597933 | Mpst_KO_upregulated |
| NM_001143776 | <i>Fam13c</i>        | 0.274249702 | 0.048370245 | Mpst_KO_upregulated |
| NM_001170982 | <i>Hnrnpc</i>        | 0.275825043 | 0.037794224 | Mpst_KO_upregulated |
| NM_001170866 | <i>Ncald</i>         | 0.278097568 | 0.041860403 | Mpst_KO_upregulated |
| NM_145954    | <i>Aldh16a1</i>      | 0.285610247 | 0.024789649 | Mpst_KO_upregulated |
| NM_198299    | <i>Enkd1</i>         | 0.285918399 | 0.011513729 | Mpst_KO_upregulated |
| NM_172872    | <i>Kank4</i>         | 0.286980778 | 0.027820315 | Mpst_KO_upregulated |
| NM_172815    | <i>Rspo2</i>         | 0.293157622 | 0.046176489 | Mpst_KO_upregulated |
| NM_001303610 | <i>Hus1</i>          | 0.301690326 | 0.038068849 | Mpst_KO_upregulated |
| NM_001146212 | <i>Mrps10</i>        | 0.30305218  | 0.03063755  | Mpst_KO_upregulated |
| NM_001110148 | <i>Mgat1</i>         | 0.303552682 | 0.048771992 | Mpst_KO_upregulated |
| NM_001166635 | <i>Mid1ip1</i>       | 0.30586617  | 0.013312395 | Mpst_KO_upregulated |
| NM_175530    | <i>Fbxo46</i>        | 0.30661666  | 0.011253494 | Mpst_KO_upregulated |
| NM_001170561 | <i>Sbfl</i>          | 0.307543646 | 0.019001898 | Mpst_KO_upregulated |
| NM_001302336 | <i>Mrpl55</i>        | 0.312107507 | 0.010965715 | Mpst_KO_upregulated |
| NM_024251    | <i>Aplf</i>          | 0.312452751 | 0.033228803 | Mpst_KO_upregulated |
| NR_027844    | <i>Pex11b</i>        | 0.316879332 | 0.041143998 | Mpst_KO_upregulated |
| NM_001199247 | <i>Kat5</i>          | 0.318624052 | 0.049822354 | Mpst_KO_upregulated |
| NM_025791    | <i>Tmem223</i>       | 0.326899672 | 0.003603333 | Mpst_KO_upregulated |
| NM_023524    | <i>Tjpt</i>          | 0.333459536 | 0.019129973 | Mpst_KO_upregulated |
| NM_133978    | <i>Cntm7</i>         | 0.338548976 | 0.024021066 | Mpst_KO_upregulated |
| NM_027434    | <i>Rprd1b</i>        | 0.343966609 | 0.041366889 | Mpst_KO_upregulated |
| NM_026995    | <i>Carkd</i>         | 0.351740471 | 0.015562617 | Mpst_KO_upregulated |
| NM_001112731 | <i>C030039L03Rik</i> | 0.353535054 | 0.048524653 | Mpst_KO_upregulated |
| NM_010438    | <i>Hk1</i>           | 0.358242602 | 0.046501743 | Mpst_KO_upregulated |
| NM_001033209 | <i>Xylb</i>          | 0.359292032 | 0.008112324 | Mpst_KO_upregulated |
| NM_001256195 | <i>Eif4g3</i>        | 0.362257782 | 0.011014513 | Mpst_KO_upregulated |
| NM_001282993 | <i>Cobl</i>          | 0.364413522 | 0.001266959 | Mpst_KO_upregulated |
| NM_026270    | <i>Akt1s1</i>        | 0.365787919 | 0.048716579 | Mpst_KO_upregulated |
| NM_001286498 | <i>Tex264</i>        | 0.369348062 | 0.027749047 | Mpst_KO_upregulated |
| NM_198214    | <i>Snph</i>          | 0.369541061 | 0.042273394 | Mpst_KO_upregulated |
| NM_028770    | <i>Krt80</i>         | 0.376762543 | 0.043103971 | Mpst_KO_upregulated |
| NM_027351    | <i>Ppil3</i>         | 0.379790933 | 0.047264688 | Mpst_KO_upregulated |
| NM_001161796 | <i>Gucylb3</i>       | 0.399335544 | 0.017543995 | Mpst_KO_upregulated |
| NM_001252460 | <i>Cyfp2</i>         | 0.405283211 | 0.008089743 | Mpst_KO_upregulated |
| NM_001166388 | <i>Pip4a3</i>        | 0.418192455 | 0.005877309 | Mpst_KO_upregulated |
| NM_001290457 | <i>Relb</i>          | 0.420436979 | 0.031826632 | Mpst_KO_upregulated |
| NM_010724    | <i>Psmb8</i>         | 0.42375119  | 0.023099094 | Mpst_KO_upregulated |
| NR_040577    | <i>1700123M08Rik</i> | 0.431430994 | 0.006165611 | Mpst_KO_upregulated |
| NM_001290477 | <i>Klhl4</i>         | 0.43532163  | 0.036488342 | Mpst_KO_upregulated |
| NM_019583    | <i>Il17rb</i>        | 0.454346847 | 0.018909936 | Mpst_KO_upregulated |
| NR_026924    | <i>1700020N18Rik</i> | 0.454605137 | 0.045017496 | Mpst_KO_upregulated |
| NM_001164413 | <i>Cnor4</i>         | 0.461483483 | 0.022757924 | Mpst_KO_upregulated |
| NM_001277992 | <i>Sik16</i>         | 0.465922326 | 0.046654198 | Mpst_KO_upregulated |
| NM_008546    | <i>Mfatp2</i>        | 0.476253827 | 0.046332481 | Mpst_KO_upregulated |
| NM_020616    | <i>Akip1</i>         | 0.485775345 | 0.041885854 | Mpst_KO_upregulated |
| NM_001199685 | <i>Taok3</i>         | 0.491072495 | 0.027143718 | Mpst_KO_upregulated |
| NR_033185    | <i>Rcbib2</i>        | 0.507031569 | 0.03429913  | Mpst_KO_upregulated |
| NM_001160219 | <i>Pum2</i>          | 0.515210489 | 0.019875633 | Mpst_KO_upregulated |
| NM_001290375 | <i>Camk1d</i>        | 0.516886997 | 0.048522584 | Mpst_KO_upregulated |
| NM_001145780 | <i>Use1</i>          | 0.51957533  | 0.038583623 | Mpst_KO_upregulated |
| NM_010839    | <i>Mtgp1</i>         | 0.526800151 | 0.041405362 | Mpst_KO_upregulated |
| NM_146024    | <i>Ankrd40</i>       | 0.536653699 | 0.040187586 | Mpst_KO_upregulated |

|              |                 |             |             |                     |
|--------------|-----------------|-------------|-------------|---------------------|
| NM_001164359 | <i>Erlin1</i>   | 0.542241455 | 0.0361156   | Mpst_KO_upregulated |
| NM_001080386 | <i>Ctla</i>     | 0.550343063 | 0.019790704 | Mpst_KO_upregulated |
| NM_001170867 | <i>Ncald</i>    | 0.556788137 | 0.037880661 | Mpst_KO_upregulated |
| NR_102282    | <i>Cops5</i>    | 0.557548983 | 0.015910014 | Mpst_KO_upregulated |
| NM_029341    | <i>Capsl</i>    | 0.580985156 | 0.008088    | Mpst_KO_upregulated |
| NM_001040131 | <i>Eif4g2</i>   | 0.581162505 | 0.0452219   | Mpst_KO_upregulated |
| NM_001270495 | <i>Tmem254b</i> | 0.582643037 | 0.016837485 | Mpst_KO_upregulated |
| NM_001302383 | <i>March8</i>   | 0.600223473 | 0.007055224 | Mpst_KO_upregulated |
| NM_007681    | <i>Cenpa</i>    | 0.607267035 | 0.023535562 | Mpst_KO_upregulated |
| NM_033474    | <i>Arvcf</i>    | 0.615265405 | 0.030696155 | Mpst_KO_upregulated |
| NM_025657    | <i>Lrrc57</i>   | 0.620258248 | 0.017851632 | Mpst_KO_upregulated |
| NM_001270495 | <i>Tmem254b</i> | 0.622310888 | 0.01480553  | Mpst_KO_upregulated |
| NM_146042    | <i>Rnf144b</i>  | 0.631033676 | 0.036367551 | Mpst_KO_upregulated |
| NM_011359    | <i>Sftpc</i>    | 0.647191256 | 0.025927819 | Mpst_KO_upregulated |
| NM_001191025 | <i>Dync1l1</i>  | 0.67798386  | 0.012671719 | Mpst_KO_upregulated |
| NM_001270495 | <i>Tmem254b</i> | 0.679384499 | 0.013291164 | Mpst_KO_upregulated |
| NM_001146293 | <i>Celf4</i>    | 0.681815561 | 0.024749004 | Mpst_KO_upregulated |
| NM_027216    | <i>Slc39a11</i> | 0.687115478 | 0.039637545 | Mpst_KO_upregulated |
| NM_031186    | <i>Ndst3</i>    | 0.689266488 | 0.038678642 | Mpst_KO_upregulated |
| NM_001008791 | <i>Whrn</i>     | 0.710802367 | 0.027805526 | Mpst_KO_upregulated |
| NM_001161629 | <i>Efcab6</i>   | 0.71182     | 0.03457082  | Mpst_KO_upregulated |
| NM_001284328 | <i>Syncrip</i>  | 0.723963207 | 0.023284527 | Mpst_KO_upregulated |
| NM_001293647 | <i>Pip5k1c</i>  | 0.740389216 | 0.0018895   | Mpst_KO_upregulated |
| NM_001291747 | <i>Xlr</i>      | 0.741097995 | 0.040768277 | Mpst_KO_upregulated |
| NM_172434    | <i>Celf3</i>    | 0.750693912 | 0.01885894  | Mpst_KO_upregulated |
| NM_053155    | <i>Clmn</i>     | 0.81444415  | 0.041873744 | Mpst_KO_upregulated |
| NM_144832    | <i>BCO17643</i> | 0.819296718 | 0.01753166  | Mpst_KO_upregulated |
| NM_001301858 | <i>Uba3</i>     | 0.838030226 | 0.044421317 | Mpst_KO_upregulated |
| NM_138312    | <i>Fam172a</i>  | 0.887491229 | 0.027489413 | Mpst_KO_upregulated |
| NM_001277280 | <i>Ank1</i>     | 0.890758191 | 0.012282248 | Mpst_KO_upregulated |
| NM_001167991 | <i>Hook2</i>    | 1.030048524 | 0.043305179 | Mpst_KO_upregulated |
| NM_001290795 | <i>Wdr45</i>    | 1.124346844 | 0.040650237 | Mpst_KO_upregulated |
| NM_001159394 | <i>Nfkbiz</i>   | 1.158792014 | 0.02145787  | Mpst_KO_upregulated |
| NM_001199360 | <i>Tmem164</i>  | 1.214007141 | 0.04557474  | Mpst_KO_upregulated |
| NM_008054    | <i>Fyn</i>      | 1.220781995 | 0.005491825 | Mpst_KO_upregulated |
| NM_172963    | <i>Micl1</i>    | 1.229522345 | 0.004251622 | Mpst_KO_upregulated |
| NM_001289785 | <i>Cryab</i>    | 1.372382099 | 0.000975047 | Mpst_KO_upregulated |
| NM_001289436 | <i>Ccdc50</i>   | 1.600926578 | 0.019575966 | Mpst_KO_upregulated |
| NM_001039387 | <i>Nsmf</i>     | 2.161510292 | 0.047581279 | Mpst_KO_upregulated |
| NM_199238    | <i>Sema6d</i>   | 4.900578903 | 0.024718602 | Mpst_KO_upregulated |
| NM_178371    | <i>Slc9a8</i>   | 4.903544557 | 0.039949626 | Mpst_KO_upregulated |
| NM_001177784 | <i>Dis3l</i>    | 5.057352872 | 0.04358277  | Mpst_KO_upregulated |
| NM_001281926 | <i>Zmynd8</i>   | 5.086358627 | 0.023541935 | Mpst_KO_upregulated |
| NM_183033    | <i>Zfp516</i>   | 5.24749189  | 0.037842616 | Mpst_KO_upregulated |
| NM_172445    | <i>Wdr37</i>    | 5.304436844 | 0.047958372 | Mpst_KO_upregulated |
| NM_201385    | <i>Plec</i>     | 5.511575508 | 0.023120016 | Mpst_KO_upregulated |
| NM_001177938 | <i>Eda</i>      | 5.926834551 | 0.010535103 | Mpst_KO_upregulated |
| NM_001281829 | <i>Phyh1</i>    | 6.066692948 | 0.015855977 | Mpst_KO_upregulated |
| NM_001166648 | <i>Zfp280c</i>  | 6.311140896 | 0.007110142 | Mpst_KO_upregulated |
| NM_008330    | <i>Ifi47</i>    | 7.69799315  | 0.006786125 | Mpst_KO_upregulated |
| NM_016885    | <i>Emcn</i>     | 7.994088303 | 0.004623172 | Mpst_KO_upregulated |

**Appendix Table S12. Gene ontology enrichment analysis of differentially expressed genes in the frontal cortex of *Mpst* KO and *Mpst* Tg mouse strains.**

| Group                                                 | PANTHER GO-Slim Biological Process                                    | Fold Enrichment | Raw P-value | FDR      |
|-------------------------------------------------------|-----------------------------------------------------------------------|-----------------|-------------|----------|
| <i>Mpst</i> KO dysregulated genes                     | regulation of alternative mRNA splicing, via spliceosome (GO:0000381) | 8.99            | 2.87E-05    | 1.28E-02 |
|                                                       | alternative mRNA splicing, via spliceosome (GO:0000380)               | 8.99            | 2.87E-05    | 1.02E-02 |
|                                                       | mRNA processing (GO:0006397)                                          | 3.47            | 9.64E-05    | 2.15E-02 |
|                                                       | RNA processing (GO:0006396)                                           | 3.01            | 2.44E-04    | 4.83E-02 |
|                                                       |                                                                       |                 |             |          |
|                                                       | PANTHER GO-Slim Molecular Function                                    | Fold Enrichment | Raw P-value | FDR      |
|                                                       | mRNA binding (GO:0003729)                                             | 3.58            | 4.21E-04    | 3.59E-02 |
|                                                       | RNA binding (GO:0003723)                                              | 2.34            | 1.96E-04    | 2.01E-02 |
|                                                       |                                                                       |                 |             |          |
|                                                       | PANTHER GO-Slim Cellular Component                                    | Fold Enrichment | Raw P-value | FDR      |
|                                                       | nucleus (GO:0005634)                                                  | 1.72            | 4.51E-04    | 4.04E-02 |
| intracellular membrane-bounded organelle (GO:0043231) | 1.51                                                                  | 2.61E-04        | 5.86E-02    |          |
| membrane-bounded organelle (GO:0043227)               | 1.5                                                                   | 2.69E-04        | 4.01E-02    |          |

| Group                             | PANTHER GO-Slim Biological Process                                           | Fold Enrichment | Raw P-value | FDR      |
|-----------------------------------|------------------------------------------------------------------------------|-----------------|-------------|----------|
| <i>Mpst</i> Tg dysregulated genes | nucleotide phosphorylation (GO:0046939)                                      | 5.46            | 7.09E-04    | 2.94E-02 |
|                                   | synaptic transmission, glutamatergic (GO:0035249)                            | 5.1             | 4.38E-04    | 2.05E-02 |
|                                   | chemical synaptic transmission (GO:0007268)                                  | 2.24            | 2.37E-04    | 1.32E-02 |
|                                   | anterograde trans-synaptic signaling (GO:0098916)                            | 2.24            | 2.37E-04    | 1.28E-02 |
|                                   | trans-synaptic signaling (GO:0099537)                                        | 2.23            | 2.48E-04    | 1.30E-02 |
|                                   | synaptic signaling (GO:0099536)                                              | 2.23            | 2.48E-04    | 1.26E-02 |
|                                   | intracellular transport (GO:0046907)                                         | 1.73            | 1.12E-04    | 9.55E-03 |
|                                   | establishment of localization in cell (GO:0051649)                           | 1.71            | 1.01E-04    | 8.98E-03 |
|                                   | nucleobase-containing compound metabolic process (GO:0006139)                | 1.7             | 4.89E-04    | 2.24E-02 |
|                                   | intracellular protein transport (GO:0006886)                                 | 1.68            | 1.06E-03    | 4.20E-02 |
|                                   | cellular aromatic compound metabolic process (GO:0006725)                    | 1.65            | 8.62E-04    | 3.49E-02 |
|                                   | transport (GO:0006810)                                                       | 1.51            | 1.57E-04    | 9.65E-03 |
|                                   | cellular metabolic process (GO:0044237)                                      | 1.47            | 1.53E-04    | 9.73E-03 |
|                                   | establishment of localization (GO:0051234)                                   | 1.46            | 6.30E-05    | 7.02E-03 |
|                                   | localization (GO:0051179)                                                    | 1.42            | 8.48E-05    | 8.90E-03 |
|                                   | regulation of cellular process (GO:0050794)                                  | 1.32            | 6.58E-04    | 2.79E-02 |
|                                   | biological regulation (GO:0065007)                                           | 1.22            | 1.11E-03    | 4.31E-02 |
|                                   | metabolic process (GO:0008152)                                               | 1.21            | 5.75E-04    | 2.57E-02 |
|                                   |                                                                              |                 |             |          |
|                                   | PANTHER GO-Slim Molecular Function                                           | Fold Enrichment | Raw P-value | FDR      |
|                                   | glutamate receptor activity (GO:0008066)                                     | 4.11            | 1.50E-03    | 4.26E-02 |
|                                   | glutamate binding (GO:0016595)                                               | 4.11            | 1.50E-03    | 4.03E-02 |
|                                   | hydro-lyase activity (GO:0016836)                                            | 4.03            | 8.69E-04    | 3.70E-02 |
|                                   | carbon-oxygen lyase activity (GO:0016835)                                    | 4.03            | 8.69E-04    | 3.42E-02 |
|                                   | carboxylic acid binding (GO:0031406)                                         | 3.09            | 1.72E-03    | 4.19E-02 |
|                                   | neurotransmitter binding (GO:0042165)                                        | 2.82            | 1.44E-03    | 4.89E-02 |
|                                   | ligand-gated ion channel activity (GO:0015276)                               | 2.76            | 1.69E-03    | 4.33E-02 |
|                                   | calcium ion binding (GO:0005509)                                             | 2.43            | 2.34E-04    | 1.33E-02 |
|                                   | ion binding (GO:0043167)                                                     | 2.13            | 1.69E-06    | 8.64E-04 |
|                                   | heterocyclic compound binding (GO:1901363)                                   | 2.11            | 1.03E-03    | 3.77E-02 |
|                                   | transferase activity, transferring phosphorus-containing groups (GO:0016772) | 2.09            | 8.58E-04    | 3.99E-02 |

|                                                                             |                        |                    |            |
|-----------------------------------------------------------------------------|------------------------|--------------------|------------|
| cation binding (GO:0043169)                                                 | 2.02                   | 1.34E-04           | 8.59E-03   |
| RNA binding (GO:0003723)                                                    | 1.71                   | 1.44E-03           | 4.61E-02   |
| transferase activity (GO:0016740)                                           | 1.55                   | 1.45E-03           | 4.36E-02   |
| catalytic activity (GO:0003824)                                             | 1.28                   | 1.88E-05           | 1.60E-03   |
| binding (GO:0005488)                                                        | 1.2                    | 2.49E-04           | 1.27E-02   |
|                                                                             |                        |                    |            |
| <b>PANTHER GO-Slim Cellular Component</b>                                   | <b>Fold Enrichment</b> | <b>Raw P-value</b> | <b>FDR</b> |
| cell body (GO:0044297)                                                      | 4.51                   | 4.27E-04           | 1.74E-02   |
| neuronal cell body (GO:0043025)                                             | 4.11                   | 1.50E-03           | 3.95E-02   |
| transferase complex, transferring phosphorus-containing groups (GO:0061695) | 2.94                   | 1.02E-03           | 3.25E-02   |
| neuron projection (GO:0043005)                                              | 2.5                    | 4.49E-05           | 2.87E-03   |
| synapse (GO:0045202)                                                        | 2.46                   | 4.20E-04           | 1.88E-02   |
| synapse part (GO:0044456)                                                   | 2.45                   | 6.07E-04           | 2.27E-02   |
| cell projection (GO:0042995)                                                | 2.05                   | 2.89E-04           | 1.44E-02   |
| plasma membrane bounded cell projection (GO:0120025)                        | 1.98                   | 9.86E-04           | 3.40E-02   |
| plasma membrane region (GO:0098590)                                         | 1.94                   | 8.94E-05           | 5.01E-03   |
| intracellular part (GO:0044424)                                             | 1.29                   | 1.80E-05           | 1.61E-03   |
| cell (GO:0005623)                                                           | 1.23                   | 1.76E-05           | 1.97E-03   |
| cell part (GO:0044464)                                                      | 1.22                   | 2.74E-05           | 2.05E-03   |

**Appendix Table S13. Differentially expressed genes from the frontal cortex of *Mpst Tg* mouse.**

| Refseq ID    | Gene                 | Log <sub>2</sub> fold change | P value     | Regulation             |
|--------------|----------------------|------------------------------|-------------|------------------------|
| NM_001252439 | <i>D16Erd472e</i>    | -7.031826953                 | 0.018302488 | Mpst_Tg_Downregulation |
| NM_018812    | <i>Pias3</i>         | -6.365427871                 | 0.017477454 | Mpst_Tg_Downregulation |
| NM_001162479 | <i>Stra6</i>         | -6.163856332                 | 0.017809574 | Mpst_Tg_Downregulation |
| NM_030265    | <i>Kcnip4</i>        | -6.048734301                 | 0.016593018 | Mpst_Tg_Downregulation |
| NM_001289596 | <i>Slc25a40</i>      | -6.032358301                 | 0.038210421 | Mpst_Tg_Downregulation |
| NM_015804    | <i>Atp11a</i>        | -5.610338577                 | 0.032011218 | Mpst_Tg_Downregulation |
| NM_001281926 | <i>Zmynd8</i>        | -5.515705025                 | 0.042294458 | Mpst_Tg_Downregulation |
| NM_001035243 | <i>Trpm3</i>         | -5.400935045                 | 0.031823909 | Mpst_Tg_Downregulation |
| NM_172587    | <i>Cdc14b</i>        | -5.383538868                 | 0.033081934 | Mpst_Tg_Downregulation |
| NM_001204281 | <i>Hdac7</i>         | -5.003319105                 | 0.04304314  | Mpst_Tg_Downregulation |
| NM_178701    | <i>Lrrc8d</i>        | -3.246011957                 | 0.029913852 | Mpst_Tg_Downregulation |
| NM_001286546 | <i>Ccpgl</i>         | -1.912573008                 | 0.003888251 | Mpst_Tg_Downregulation |
| NM_001038700 | <i>Frbp1</i>         | -1.580472758                 | 0.008564262 | Mpst_Tg_Downregulation |
| NM_028811    | <i>Elp3</i>          | -1.267563726                 | 0.006154797 | Mpst_Tg_Downregulation |
| NM_011523    | <i>Synj2</i>         | -1.180682326                 | 0.008612549 | Mpst_Tg_Downregulation |
| NM_001098237 | <i>Zbtb3</i>         | -1.156420222                 | 0.022477822 | Mpst_Tg_Downregulation |
| NR_045869    | <i>Gm9866</i>        | -1.087972438                 | 0.022241967 | Mpst_Tg_Downregulation |
| NR_028280    | <i>Prr18</i>         | -1.045744612                 | 0.002471894 | Mpst_Tg_Downregulation |
| NM_009122    | <i>Satb1</i>         | -1.043387998                 | 0.018988682 | Mpst_Tg_Downregulation |
| NM_028027    | <i>Arhgef25</i>      | -0.955094645                 | 0.011897939 | Mpst_Tg_Downregulation |
| NM_001302506 | <i>Tmub2</i>         | -0.952876451                 | 0.020816054 | Mpst_Tg_Downregulation |
| NM_144731    | <i>Galnt7</i>        | -0.916041368                 | 0.019674067 | Mpst_Tg_Downregulation |
| NR_040260    | <i>2210408F21Rik</i> | -0.906243493                 | 0.007698294 | Mpst_Tg_Downregulation |
| NM_001177655 | <i>Nsmf</i>          | -0.903036424                 | 0.016355997 | Mpst_Tg_Downregulation |
| NM_016865    | <i>Htatip2</i>       | -0.900103625                 | 0.012727248 | Mpst_Tg_Downregulation |
| NM_001164099 | <i>Add3</i>          | -0.875292542                 | 0.037441826 | Mpst_Tg_Downregulation |
| NM_001282044 | <i>Schip1</i>        | -0.867869272                 | 0.01627605  | Mpst_Tg_Downregulation |
| NM_001024857 | <i>Tibk2</i>         | -0.838802869                 | 0.009304209 | Mpst_Tg_Downregulation |
| NM_001291190 | <i>Ssh2</i>          | -0.835503572                 | 0.014512986 | Mpst_Tg_Downregulation |
| NM_001277970 | <i>Itga6</i>         | -0.816646245                 | 0.014296822 | Mpst_Tg_Downregulation |
| NM_001177605 | <i>Ak4</i>           | -0.782833233                 | 0.0248379   | Mpst_Tg_Downregulation |
| NM_001139511 | <i>Raly</i>          | -0.776538057                 | 0.005883337 | Mpst_Tg_Downregulation |
| NM_020276    | <i>Nsmf</i>          | -0.762911615                 | 0.03183584  | Mpst_Tg_Downregulation |
| NM_001029836 | <i>Npnt</i>          | -0.756175603                 | 0.009134095 | Mpst_Tg_Downregulation |
| NM_001141933 | <i>Nkain4</i>        | -0.712509379                 | 0.038609624 | Mpst_Tg_Downregulation |
| NM_001281929 | <i>Gria3</i>         | -0.698373851                 | 0.027050789 | Mpst_Tg_Downregulation |
| NM_001033356 | <i>Ntn5</i>          | -0.684122292                 | 0.02363356  | Mpst_Tg_Downregulation |
| NM_027100    | <i>Rwdd2a</i>        | -0.679561024                 | 0.019880286 | Mpst_Tg_Downregulation |
| NM_001010941 | <i>Gpr12</i>         | -0.669760524                 | 0.020356059 | Mpst_Tg_Downregulation |
| NM_145375    | <i>Tm6sf1</i>        | -0.661581489                 | 0.030195165 | Mpst_Tg_Downregulation |
| NR_028056    | <i>Rit1</i>          | -0.642863934                 | 0.026559598 | Mpst_Tg_Downregulation |
| NM_009393    | <i>Tnnc1</i>         | -0.627869213                 | 5.01735E-06 | Mpst_Tg_Downregulation |
| NM_001098230 | <i>Pdp1</i>          | -0.59149559                  | 0.008194007 | Mpst_Tg_Downregulation |
| NM_153597    | <i>Trpt1</i>         | -0.589414762                 | 0.033278693 | Mpst_Tg_Downregulation |
| NM_001161822 | <i>Rgs17</i>         | -0.580156143                 | 0.009822152 | Mpst_Tg_Downregulation |
| NM_001302095 | <i>Gfra2</i>         | -0.576795117                 | 0.01609594  | Mpst_Tg_Downregulation |
| NM_020256    | <i>Zbtb33</i>        | -0.576608782                 | 0.030439631 | Mpst_Tg_Downregulation |
| NM_145215    | <i>Abhd11</i>        | -0.565158055                 | 0.030563545 | Mpst_Tg_Downregulation |
| NM_053078    | <i>Nrep</i>          | -0.563619394                 | 0.005405412 | Mpst_Tg_Downregulation |
| NM_001271430 | <i>Cd82</i>          | -0.56126336                  | 0.040525815 | Mpst_Tg_Downregulation |
| NM_001302085 | <i>Uros</i>          | -0.535099605                 | 0.042525149 | Mpst_Tg_Downregulation |
| NM_001302336 | <i>Mrpl55</i>        | -0.53247534                  | 0.038910179 | Mpst_Tg_Downregulation |
| NM_001163569 | <i>Kif9</i>          | -0.531012672                 | 0.046265418 | Mpst_Tg_Downregulation |
| NM_001286600 | <i>Clasp2</i>        | -0.517712537                 | 0.006480956 | Mpst_Tg_Downregulation |
| NM_001276482 | <i>Dag1</i>          | -0.509248109                 | 0.029636919 | Mpst_Tg_Downregulation |
| NR_040257    | <i>2210408F21Rik</i> | -0.508328498                 | 0.00629517  | Mpst_Tg_Downregulation |



|              |                      |              |             |                        |
|--------------|----------------------|--------------|-------------|------------------------|
| NM_001286362 | <i>Tcf25</i>         | -0.506744444 | 0.014867442 | Mpst_Tg_Downregulation |
| NR_045868    | <i>Gm9866</i>        | -0.505418984 | 0.000438511 | Mpst_Tg_Downregulation |
| NM_001163764 | <i>Tcf19</i>         | -0.502024373 | 0.008960471 | Mpst_Tg_Downregulation |
| NM_207161    | <i>Dnph1</i>         | -0.497740428 | 0.02923159  | Mpst_Tg_Downregulation |
| NM_001134459 | <i>Prickle2</i>      | -0.488455164 | 0.038965165 | Mpst_Tg_Downregulation |
| NM_134066    | <i>Akr1c18</i>       | -0.486525397 | 0.048474939 | Mpst_Tg_Downregulation |
| NM_026518    | <i>Rnf146</i>        | -0.480071681 | 0.035031525 | Mpst_Tg_Downregulation |
| NM_001271759 | <i>Adra1a</i>        | -0.479161564 | 0.035901563 | Mpst_Tg_Downregulation |
| NM_011444    | <i>Sox5</i>          | -0.47210266  | 0.016856431 | Mpst_Tg_Downregulation |
| NM_178929    | <i>Kazald1</i>       | -0.466850218 | 0.00650838  | Mpst_Tg_Downregulation |
| NM_001130408 | <i>Arf1</i>          | -0.452985867 | 0.013441759 | Mpst_Tg_Downregulation |
| NM_153060    | <i>Spns2</i>         | -0.448687986 | 0.045569909 | Mpst_Tg_Downregulation |
| NM_033564    | <i>Mpv17l</i>        | -0.447539918 | 0.01601173  | Mpst_Tg_Downregulation |
| NM_178779    | <i>Rnf152</i>        | -0.445536239 | 0.039456927 | Mpst_Tg_Downregulation |
| NM_027476    | <i>Zdhhc24</i>       | -0.432106788 | 0.034895912 | Mpst_Tg_Downregulation |
| NM_178643    | <i>C230052112Rik</i> | -0.431331278 | 0.032797363 | Mpst_Tg_Downregulation |
| NM_001113554 | <i>Nudcd1</i>        | -0.4210442   | 0.038383161 | Mpst_Tg_Downregulation |
| NM_138303    | <i>Yipf2</i>         | -0.419845022 | 0.014396469 | Mpst_Tg_Downregulation |
| NM_001252055 | <i>Ly6c1</i>         | -0.41656549  | 0.025121889 | Mpst_Tg_Downregulation |
| NM_001288612 | <i>Atg9a</i>         | -0.413906374 | 0.00762262  | Mpst_Tg_Downregulation |
| NM_025426    | <i>Med7</i>          | -0.404101371 | 0.0344107   | Mpst_Tg_Downregulation |
| NM_022009    | <i>Flii</i>          | -0.396201465 | 0.006412254 | Mpst_Tg_Downregulation |
| NM_001161722 | <i>Tfeb</i>          | -0.390132322 | 0.021606065 | Mpst_Tg_Downregulation |
| NM_001302078 | <i>Fkbp1a</i>        | -0.379853621 | 0.00352545  | Mpst_Tg_Downregulation |
| NM_178256    | <i>Reps2</i>         | -0.37837863  | 0.006818853 | Mpst_Tg_Downregulation |
| NM_001291076 | <i>Snph</i>          | -0.376765193 | 0.042441743 | Mpst_Tg_Downregulation |
| NM_001113564 | <i>Serbp1</i>        | -0.374199128 | 0.002096617 | Mpst_Tg_Downregulation |
| NM_007394    | <i>Acvr1</i>         | -0.37385336  | 0.014040017 | Mpst_Tg_Downregulation |
| NM_001130185 | <i>Jadel</i>         | -0.367105394 | 0.047529572 | Mpst_Tg_Downregulation |
| NM_001302779 | <i>Iffo1</i>         | -0.361620619 | 0.042586621 | Mpst_Tg_Downregulation |
| NM_080433    | <i>Fezf2</i>         | -0.360523363 | 0.03690322  | Mpst_Tg_Downregulation |
| NM_010131    | <i>Emx1</i>          | -0.360174285 | 0.018276947 | Mpst_Tg_Downregulation |
| NM_028897    | <i>Mei1</i>          | -0.359418355 | 0.028460731 | Mpst_Tg_Downregulation |
| NM_001025584 | <i>Kcnj6</i>         | -0.358415642 | 0.049766464 | Mpst_Tg_Downregulation |
| NM_001002011 | <i>Lmna</i>          | -0.357564604 | 0.009565045 | Mpst_Tg_Downregulation |
| NM_011344    | <i>Sel1l</i>         | -0.357475156 | 0.004848597 | Mpst_Tg_Downregulation |
| NM_001271548 | <i>Gm715</i>         | -0.356829099 | 0.01162675  | Mpst_Tg_Downregulation |
| NM_013838    | <i>Trpc6</i>         | -0.350923163 | 0.047238906 | Mpst_Tg_Downregulation |
| NM_011878    | <i>Tiam2</i>         | -0.34920452  | 0.04035477  | Mpst_Tg_Downregulation |
| NM_152947    | <i>Ovol2</i>         | -0.347751415 | 0.028120707 | Mpst_Tg_Downregulation |
| NM_001110211 | <i>Anxa6</i>         | -0.347116018 | 0.02406202  | Mpst_Tg_Downregulation |
| NM_001043354 | <i>Rorb</i>          | -0.346968636 | 0.037021455 | Mpst_Tg_Downregulation |
| NM_031161    | <i>Cck</i>           | -0.34474743  | 0.000715399 | Mpst_Tg_Downregulation |
| NM_026675    | <i>Nudt22</i>        | -0.344314573 | 0.026485846 | Mpst_Tg_Downregulation |
| NM_013613    | <i>Nr4a2</i>         | -0.342040879 | 0.034676894 | Mpst_Tg_Downregulation |
| NM_001190386 | <i>Caly</i>          | -0.341122201 | 0.016478521 | Mpst_Tg_Downregulation |
| NM_198408    | <i>Crhbp</i>         | -0.339550655 | 0.001611807 | Mpst_Tg_Downregulation |
| NM_001289710 | <i>Sh3glb2</i>       | -0.338815223 | 0.037539231 | Mpst_Tg_Downregulation |
| NM_008939    | <i>Prss12</i>        | -0.337598271 | 0.017831976 | Mpst_Tg_Downregulation |
| NM_001286785 | <i>Mag1l</i>         | -0.334028672 | 0.030615981 | Mpst_Tg_Downregulation |
| NR_027832    | <i>1700020114Rik</i> | -0.322449797 | 0.015741706 | Mpst_Tg_Downregulation |
| NM_001177720 | <i>Madd</i>          | -0.32022901  | 0.001232782 | Mpst_Tg_Downregulation |
| NM_030234    | <i>Wdr76</i>         | -0.320052831 | 0.012136729 | Mpst_Tg_Downregulation |
| NM_001102437 | <i>Acbd5</i>         | -0.320005864 | 0.001345871 | Mpst_Tg_Downregulation |
| NM_134094    | <i>Ncald</i>         | -0.319990895 | 0.012923177 | Mpst_Tg_Downregulation |
| NM_001198911 | <i>Arhgef2</i>       | -0.317717912 | 0.023366915 | Mpst_Tg_Downregulation |
| NM_001166251 | <i>Mgll</i>          | -0.315141002 | 0.003060661 | Mpst_Tg_Downregulation |
| NM_008627    | <i>Meis3</i>         | -0.313712542 | 0.037975767 | Mpst_Tg_Downregulation |
| NM_153820    | <i>Arhgap15</i>      | -0.311754089 | 0.018012501 | Mpst_Tg_Downregulation |
| NM_001285999 | <i>Plekha5</i>       | -0.311272461 | 0.028914784 | Mpst_Tg_Downregulation |
| NR_045778    | <i>C730002L08Rik</i> | -0.309869615 | 0.043518325 | Mpst_Tg_Downregulation |
| NM_001160256 | <i>Smg7</i>          | -0.309799283 | 0.020020975 | Mpst_Tg_Downregulation |

|              |                      |              |             |                        |
|--------------|----------------------|--------------|-------------|------------------------|
| NM_032397    | <i>Kcnn1</i>         | -0.309053838 | 0.007796019 | Mpst_Tg_Downregulation |
| NM_138663    | <i>Pcdha12</i>       | -0.308810389 | 0.017436088 | Mpst_Tg_Downregulation |
| NM_001252105 | <i>Cadps2</i>        | -0.308420897 | 0.027385945 | Mpst_Tg_Downregulation |
| NM_172815    | <i>Rspo2</i>         | -0.308157776 | 0.04072273  | Mpst_Tg_Downregulation |
| NM_173777    | <i>Olfm2</i>         | -0.3054474   | 0.004201641 | Mpst_Tg_Downregulation |
| NM_010074    | <i>Dpp4</i>          | -0.30493765  | 0.042335129 | Mpst_Tg_Downregulation |
| NM_175443    | <i>Etck2</i>         | -0.302096257 | 0.021156009 | Mpst_Tg_Downregulation |
| NM_001081981 | <i>Nfix</i>          | -0.300216923 | 0.030389161 | Mpst_Tg_Downregulation |
| NM_024215    | <i>Zfp593</i>        | -0.299430289 | 0.010269961 | Mpst_Tg_Downregulation |
| NM_198602    | <i>Cux1</i>          | -0.297531272 | 0.021891879 | Mpst_Tg_Downregulation |
| NM_177910    | <i>Gmppb</i>         | -0.295442361 | 0.043543385 | Mpst_Tg_Downregulation |
| NM_010858    | <i>Myl4</i>          | -0.295144127 | 0.0325284   | Mpst_Tg_Downregulation |
| NM_001081960 | <i>Clasp2</i>        | -0.29382056  | 0.00377518  | Mpst_Tg_Downregulation |
| NM_001013012 | <i>Zfp787</i>        | -0.293056845 | 0.001170435 | Mpst_Tg_Downregulation |
| NM_001177616 | <i>Arpp21</i>        | -0.291590298 | 0.019734609 | Mpst_Tg_Downregulation |
| NM_001290636 | <i>Dock7</i>         | -0.291527701 | 0.049154784 | Mpst_Tg_Downregulation |
| NM_001033496 | <i>Zfp213</i>        | -0.290101071 | 0.041540532 | Mpst_Tg_Downregulation |
| NM_145419    | <i>Hkdc1</i>         | -0.286204289 | 0.011481822 | Mpst_Tg_Downregulation |
| NM_030226    | <i>9130019O22Rik</i> | -0.286161139 | 0.020798274 | Mpst_Tg_Downregulation |
| NM_029353    | <i>Malsu1</i>        | -0.285013411 | 0.026150596 | Mpst_Tg_Downregulation |
| NM_001113181 | <i>Gria4</i>         | -0.279817294 | 0.014191688 | Mpst_Tg_Downregulation |
| NM_001145820 | <i>Gpd2</i>          | -0.277462686 | 0.035142799 | Mpst_Tg_Downregulation |
| NM_011698    | <i>Lin7b</i>         | -0.275292323 | 0.022144537 | Mpst_Tg_Downregulation |
| NM_001252491 | <i>Osbpl1a</i>       | -0.274586397 | 0.035413162 | Mpst_Tg_Downregulation |
| NR_027966    | <i>4930429B21Rik</i> | -0.269522375 | 0.018415239 | Mpst_Tg_Downregulation |
| NM_172812    | <i>Htr2a</i>         | -0.26809855  | 0.035374472 | Mpst_Tg_Downregulation |
| NM_198001    | <i>1110008P14Rik</i> | -0.265516686 | 0.000231156 | Mpst_Tg_Downregulation |
| NM_001253692 | <i>Elmod3</i>        | -0.265389758 | 0.012693958 | Mpst_Tg_Downregulation |
| NM_001282127 | <i>Brpf1</i>         | -0.262430439 | 0.043058284 | Mpst_Tg_Downregulation |
| NM_010710    | <i>Lhx2</i>          | -0.256327959 | 0.023233239 | Mpst_Tg_Downregulation |
| NR_024325    | <i>9130024F11Rik</i> | -0.249481381 | 0.046509301 | Mpst_Tg_Downregulation |
| NM_198651    | <i>4430402I18Rik</i> | -0.24940281  | 0.023892985 | Mpst_Tg_Downregulation |
| NM_053162    | <i>Mrpl34</i>        | -0.249117573 | 0.012040907 | Mpst_Tg_Downregulation |
| NM_001146351 | <i>Ephb6</i>         | -0.248348589 | 0.010086169 | Mpst_Tg_Downregulation |
| NM_153104    | <i>Phosphol</i>      | -0.247575683 | 0.039974256 | Mpst_Tg_Downregulation |
| NM_030689    | <i>Nptxr</i>         | -0.245125977 | 0.037769038 | Mpst_Tg_Downregulation |
| NM_170673    | <i>Cpne9</i>         | -0.243231588 | 0.014112189 | Mpst_Tg_Downregulation |
| NM_001253716 | <i>Msra</i>          | -0.236987059 | 0.014379715 | Mpst_Tg_Downregulation |
| NM_172822    | <i>Pigz</i>          | -0.236148626 | 0.025146961 | Mpst_Tg_Downregulation |
| NM_175029    | <i>Atg4c</i>         | -0.235433589 | 0.047892247 | Mpst_Tg_Downregulation |
| NM_027435    | <i>Atad2</i>         | -0.234817402 | 0.010270805 | Mpst_Tg_Downregulation |
| NM_145942    | <i>Hmgcs1</i>        | -0.232915039 | 0.03211182  | Mpst_Tg_Downregulation |
| NM_139146    | <i>Satb2</i>         | -0.231174887 | 0.013403942 | Mpst_Tg_Downregulation |
| NM_026895    | <i>Tatdn3</i>        | -0.230866717 | 0.044971352 | Mpst_Tg_Downregulation |
| NM_013645    | <i>Pvalb</i>         | -0.230196488 | 0.010160759 | Mpst_Tg_Downregulation |
| NM_001304965 | <i>Pou6f1</i>        | -0.228448973 | 0.01391358  | Mpst_Tg_Downregulation |
| NM_001128181 | <i>Dlgap1</i>        | -0.226933564 | 0.002878886 | Mpst_Tg_Downregulation |
| NM_178399    | <i>3110035E14Rik</i> | -0.226327706 | 0.009798875 | Mpst_Tg_Downregulation |
| NM_007634    | <i>Ccnf</i>          | -0.225391242 | 0.021846193 | Mpst_Tg_Downregulation |
| NM_001081381 | <i>Elp6</i>          | -0.225211101 | 0.010391621 | Mpst_Tg_Downregulation |
| NM_207204    | <i>Ninl</i>          | -0.222644772 | 0.012184955 | Mpst_Tg_Downregulation |
| NM_001160353 | <i>Grm2</i>          | -0.220576684 | 0.024291177 | Mpst_Tg_Downregulation |
| NM_001037707 | <i>Zfp27</i>         | -0.220071832 | 0.048735735 | Mpst_Tg_Downregulation |
| NM_145362    | <i>Alg1</i>          | -0.219448763 | 0.030704528 | Mpst_Tg_Downregulation |
| NM_015802    | <i>Dlc1</i>          | -0.219120211 | 0.029619989 | Mpst_Tg_Downregulation |
| NM_022982    | <i>Rtn4r</i>         | -0.21851466  | 0.021827507 | Mpst_Tg_Downregulation |
| NM_001160211 | <i>Cnih3</i>         | -0.218146892 | 0.001459087 | Mpst_Tg_Downregulation |
| NM_138583    | <i>Tango2</i>        | -0.215545177 | 0.001480443 | Mpst_Tg_Downregulation |
| NM_001170537 | <i>Mef2c</i>         | -0.215346008 | 0.020745517 | Mpst_Tg_Downregulation |
| NM_053190    | <i>S1pr5</i>         | -0.213773324 | 0.019536033 | Mpst_Tg_Downregulation |
| NM_027123    | <i>Fastkd3</i>       | -0.2137532   | 0.009845157 | Mpst_Tg_Downregulation |
| NM_025992    | <i>Herc6</i>         | -0.213610836 | 0.044355736 | Mpst_Tg_Downregulation |

|              |                      |              |             |                        |
|--------------|----------------------|--------------|-------------|------------------------|
| NM_010212    | <i>Fhl2</i>          | -0.213403858 | 0.004140378 | Mpst_Tg_Downregulation |
| NM_001099288 | <i>Arhgap44</i>      | -0.210068295 | 0.028969906 | Mpst_Tg_Downregulation |
| NM_033269    | <i>Chrm3</i>         | -0.209089077 | 0.028986794 | Mpst_Tg_Downregulation |
| NM_001100449 | <i>Taf4b</i>         | -0.205368623 | 0.017064344 | Mpst_Tg_Downregulation |
| NM_001303015 | <i>Ap3s1</i>         | -0.205289057 | 0.031212082 | Mpst_Tg_Downregulation |
| NM_001163516 | <i>Pex5l</i>         | -0.204664297 | 0.025926663 | Mpst_Tg_Downregulation |
| NM_001160403 | <i>Il1rap1l</i>      | -0.204106904 | 0.045888871 | Mpst_Tg_Downregulation |
| NM_001293631 | <i>Slc37a4</i>       | -0.202738764 | 0.006424152 | Mpst_Tg_Downregulation |
| NM_001293685 | <i>Vii1a</i>         | -0.201873291 | 0.004871537 | Mpst_Tg_Downregulation |
| NM_001130166 | <i>Oxr1</i>          | -0.20092596  | 0.02597524  | Mpst_Tg_Downregulation |
| NM_001109753 | <i>Sv2b</i>          | -0.20090798  | 0.019489084 | Mpst_Tg_Downregulation |
| NM_001037906 | <i>Nell1</i>         | -0.200256873 | 0.029221504 | Mpst_Tg_Downregulation |
| NM_026021    | <i>Zmynd19</i>       | -0.199589551 | 0.019277268 | Mpst_Tg_Downregulation |
| NM_001170694 | <i>Rcbtb2</i>        | -0.199497344 | 0.048203603 | Mpst_Tg_Downregulation |
| NM_146028    | <i>Stac2</i>         | -0.199010617 | 0.008531653 | Mpst_Tg_Downregulation |
| NM_008537    | <i>Amacr</i>         | -0.197781918 | 0.020485397 | Mpst_Tg_Downregulation |
| NM_001146294 | <i>Celf4</i>         | -0.196461682 | 0.035473278 | Mpst_Tg_Downregulation |
| NM_010895    | <i>Neurod2</i>       | -0.196394102 | 0.012687097 | Mpst_Tg_Downregulation |
| NM_010173    | <i>Faah</i>          | -0.195986345 | 0.003983721 | Mpst_Tg_Downregulation |
| NM_026345    | <i>Mansc1</i>        | -0.195903304 | 0.015169137 | Mpst_Tg_Downregulation |
| NM_001033341 | <i>Zfp407</i>        | -0.195437928 | 0.005947567 | Mpst_Tg_Downregulation |
| NM_001025388 | <i>Eno1b</i>         | -0.195314778 | 0.040557167 | Mpst_Tg_Downregulation |
| NM_199024    | <i>Nol4</i>          | -0.195212819 | 0.004978701 | Mpst_Tg_Downregulation |
| NM_010250    | <i>Gabra1</i>        | -0.195105799 | 0.025943181 | Mpst_Tg_Downregulation |
| NM_001289658 | <i>Agbl3</i>         | -0.195046646 | 0.039814737 | Mpst_Tg_Downregulation |
| NM_026878    | <i>Rasl11b</i>       | -0.195009631 | 0.043628677 | Mpst_Tg_Downregulation |
| NM_001193305 | <i>Mical2</i>        | -0.191987864 | 0.036964614 | Mpst_Tg_Downregulation |
| NM_028243    | <i>Prcp</i>          | -0.191536944 | 0.011631229 | Mpst_Tg_Downregulation |
| NM_001177630 | <i>Etl4</i>          | -0.191403289 | 0.025059745 | Mpst_Tg_Downregulation |
| NM_001081141 | <i>Gabbr2</i>        | -0.189657532 | 0.012750146 | Mpst_Tg_Downregulation |
| NM_010942    | <i>Sept6</i>         | -0.189322389 | 0.015991753 | Mpst_Tg_Downregulation |
| NM_029530    | <i>Lamp5</i>         | -0.189184084 | 0.003779955 | Mpst_Tg_Downregulation |
| NM_001198968 | <i>Itsn2</i>         | -0.188233909 | 0.017853556 | Mpst_Tg_Downregulation |
| NM_001177480 | <i>Gm14391</i>       | -0.188103408 | 0.04195279  | Mpst_Tg_Downregulation |
| NM_001164294 | <i>Cuedc2</i>        | -0.187712424 | 0.046440533 | Mpst_Tg_Downregulation |
| NM_027519    | <i>Medag</i>         | -0.186880534 | 0.011111501 | Mpst_Tg_Downregulation |
| NM_028023    | <i>Cdca4</i>         | -0.184951554 | 0.005297096 | Mpst_Tg_Downregulation |
| NM_001170800 | <i>Ipcef1</i>        | -0.184796662 | 0.039317265 | Mpst_Tg_Downregulation |
| NM_053161    | <i>Mrpl27</i>        | -0.184629054 | 0.000434453 | Mpst_Tg_Downregulation |
| NM_026790    | <i>Ifi27</i>         | -0.184336868 | 0.033049359 | Mpst_Tg_Downregulation |
| NM_172885    | <i>Tmem132d</i>      | -0.184070205 | 0.047234969 | Mpst_Tg_Downregulation |
| NM_019833    | <i>Fam69b</i>        | -0.18315225  | 0.028343453 | Mpst_Tg_Downregulation |
| NM_133804    | <i>Tmem132a</i>      | -0.182607164 | 0.012456302 | Mpst_Tg_Downregulation |
| NM_013546    | <i>Hebp1</i>         | -0.182358341 | 0.049076591 | Mpst_Tg_Downregulation |
| NM_138956    | <i>Rassf3</i>        | -0.181812503 | 0.04440877  | Mpst_Tg_Downregulation |
| NM_021452    | <i>Kcnmb4</i>        | -0.181662352 | 0.035397117 | Mpst_Tg_Downregulation |
| NM_001012330 | <i>Zbtb18</i>        | -0.180394423 | 0.00812291  | Mpst_Tg_Downregulation |
| NM_146244    | <i>Rps6kl1</i>       | -0.180235941 | 0.008489085 | Mpst_Tg_Downregulation |
| NM_177640    | <i>D030056L22Rik</i> | -0.18021049  | 0.002368656 | Mpst_Tg_Downregulation |
| NM_015789    | <i>Dkk1l</i>         | -0.179335802 | 0.043825078 | Mpst_Tg_Downregulation |
| NM_001166065 | <i>Gcnt4</i>         | -0.179322827 | 0.034925721 | Mpst_Tg_Downregulation |
| NM_153529    | <i>Nrn1</i>          | -0.179215674 | 0.017691458 | Mpst_Tg_Downregulation |
| NM_001081567 | <i>Mapk10</i>        | -0.179054693 | 0.001602144 | Mpst_Tg_Downregulation |
| NM_145128    | <i>Mgat5</i>         | -0.178003741 | 0.022999787 | Mpst_Tg_Downregulation |
| NM_198122    | <i>Arid4b</i>        | -0.177881682 | 0.02617739  | Mpst_Tg_Downregulation |
| NM_001038010 | <i>Kat2a</i>         | -0.177846128 | 0.048588673 | Mpst_Tg_Downregulation |
| NM_009904    | <i>Clgn</i>          | -0.177252879 | 0.026768581 | Mpst_Tg_Downregulation |
| NM_008426    | <i>Kcnj3</i>         | -0.176792863 | 0.026523148 | Mpst_Tg_Downregulation |
| NM_001042451 | <i>Snca</i>          | -0.176691461 | 0.019738716 | Mpst_Tg_Downregulation |
| NM_001040087 | <i>Syt12</i>         | -0.176384122 | 0.024570274 | Mpst_Tg_Downregulation |
| NM_008384    | <i>Inpp1</i>         | -0.174971244 | 0.045312032 | Mpst_Tg_Downregulation |
| NR_040411    | <i>Gm11549</i>       | -0.174694673 | 0.037846183 | Mpst_Tg_Downregulation |

|              |                 |              |             |                        |
|--------------|-----------------|--------------|-------------|------------------------|
| NM_021877    | <i>Hr</i>       | -0.17469352  | 0.043659759 | Mpst_Tg_Downregulation |
| NM_207220    | <i>Gpr137</i>   | -0.174599402 | 0.038930626 | Mpst_Tg_Downregulation |
| NM_001114660 | <i>Scfd2</i>    | -0.17426944  | 0.039405686 | Mpst_Tg_Downregulation |
| NM_016744    | <i>Pde1a</i>    | -0.174044255 | 0.031482511 | Mpst_Tg_Downregulation |
| NM_028009    | <i>Rpusd1</i>   | -0.172952523 | 0.014533495 | Mpst_Tg_Downregulation |
| NM_001163399 | <i>Elavl4</i>   | -0.172923048 | 0.048929928 | Mpst_Tg_Downregulation |
| NM_175398    | <i>Fam212b</i>  | -0.172512524 | 0.009951728 | Mpst_Tg_Downregulation |
| NM_001033908 | <i>Med22</i>    | -0.17196504  | 0.026360639 | Mpst_Tg_Downregulation |
| NM_172701    | <i>Oscpl</i>    | -0.171146642 | 0.038096014 | Mpst_Tg_Downregulation |
| NM_001164585 | <i>Dnajc6</i>   | -0.170999664 | 0.006668574 | Mpst_Tg_Downregulation |
| NM_001159774 | <i>Ikkbb</i>    | -0.170377177 | 0.020217167 | Mpst_Tg_Downregulation |
| NM_001276321 | <i>Cyhr1</i>    | -0.170352214 | 0.033857604 | Mpst_Tg_Downregulation |
| NM_172829    | <i>St6gal2</i>  | -0.170111374 | 0.04180218  | Mpst_Tg_Downregulation |
| NM_026255    | <i>Slc25a26</i> | -0.169452423 | 0.047825606 | Mpst_Tg_Downregulation |
| NM_026520    | <i>Fam122a</i>  | -0.169437726 | 0.015084016 | Mpst_Tg_Downregulation |
| NM_177868    | <i>Fhad1</i>    | -0.169421392 | 0.047402348 | Mpst_Tg_Downregulation |
| NM_001040026 | <i>Sco1</i>     | -0.168957601 | 0.005587215 | Mpst_Tg_Downregulation |
| NM_011660    | <i>Txn1</i>     | -0.168837461 | 0.007199621 | Mpst_Tg_Downregulation |
| NM_010699    | <i>Ldha</i>     | -0.168298677 | 0.018402606 | Mpst_Tg_Downregulation |
| NM_026746    | <i>Nsmce2</i>   | -0.167726702 | 0.020792067 | Mpst_Tg_Downregulation |
| NM_130858    | <i>Nxph3</i>    | -0.167174563 | 0.040665053 | Mpst_Tg_Downregulation |
| NM_001024955 | <i>Pik3r1</i>   | -0.166843027 | 0.019081195 | Mpst_Tg_Downregulation |
| NM_008826    | <i>Pfkl</i>     | -0.166120497 | 0.004411708 | Mpst_Tg_Downregulation |
| NM_001252342 | <i>Syt1</i>     | -0.166070464 | 0.016305309 | Mpst_Tg_Downregulation |
| NM_010316    | <i>Gng3</i>     | -0.165345236 | 0.009382054 | Mpst_Tg_Downregulation |
| NM_025910    | <i>Mina</i>     | -0.164960839 | 0.039615175 | Mpst_Tg_Downregulation |
| NM_001025309 | <i>Pja2</i>     | -0.164605902 | 0.037812748 | Mpst_Tg_Downregulation |
| NM_172710    | <i>Sel1l3</i>   | -0.164506023 | 0.003921728 | Mpst_Tg_Downregulation |
| NM_008202    | <i>Slc39a7</i>  | -0.164489489 | 0.025722043 | Mpst_Tg_Downregulation |
| NM_027193    | <i>Dph5</i>     | -0.164351037 | 0.021268228 | Mpst_Tg_Downregulation |
| NM_133803    | <i>Dpp3</i>     | -0.1640381   | 0.009673991 | Mpst_Tg_Downregulation |
| NM_023456    | <i>Npy</i>      | -0.163367689 | 0.017220864 | Mpst_Tg_Downregulation |
| NM_026998    | <i>Snx6</i>     | -0.163123475 | 0.024076896 | Mpst_Tg_Downregulation |
| NM_134072    | <i>Akr1c14</i>  | -0.162377981 | 0.033521011 | Mpst_Tg_Downregulation |
| NM_080428    | <i>Fbxw7</i>    | -0.162221594 | 0.013101816 | Mpst_Tg_Downregulation |
| NM_026631    | <i>Nhp2</i>     | -0.161703991 | 0.039727693 | Mpst_Tg_Downregulation |
| NM_008704    | <i>Nme1</i>     | -0.161346046 | 0.010343613 | Mpst_Tg_Downregulation |
| NM_021322    | <i>Wdr4</i>     | -0.161161465 | 0.027117326 | Mpst_Tg_Downregulation |
| NM_033074    | <i>Tars</i>     | -0.161150216 | 0.004655541 | Mpst_Tg_Downregulation |
| NM_199447    | <i>Rrp12</i>    | -0.160944325 | 0.047314583 | Mpst_Tg_Downregulation |
| NM_153405    | <i>Rbm45</i>    | -0.160002872 | 0.034829803 | Mpst_Tg_Downregulation |
| NM_001039710 | <i>Coq10b</i>   | -0.159666213 | 0.030157439 | Mpst_Tg_Downregulation |
| NM_001276763 | <i>Brsk2</i>    | -0.159449976 | 0.040682413 | Mpst_Tg_Downregulation |
| NM_008429    | <i>Kcnj9</i>    | -0.158468494 | 0.016738032 | Mpst_Tg_Downregulation |
| NM_001081007 | <i>Zfp382</i>   | -0.158263229 | 0.044065665 | Mpst_Tg_Downregulation |
| NM_010191    | <i>Fdft1</i>    | -0.158244771 | 0.020225146 | Mpst_Tg_Downregulation |
| NM_008983    | <i>Ptprk</i>    | -0.158123557 | 0.048557507 | Mpst_Tg_Downregulation |
| NM_001289490 | <i>Oard1</i>    | -0.158107099 | 0.020515797 | Mpst_Tg_Downregulation |
| NM_172631    | <i>Ldlrad4</i>  | -0.157421514 | 0.01520506  | Mpst_Tg_Downregulation |
| NM_001015046 | <i>Rap1gap2</i> | -0.157201995 | 0.001174058 | Mpst_Tg_Downregulation |
| NM_178936    | <i>Tmem56</i>   | -0.155922572 | 0.047619084 | Mpst_Tg_Downregulation |
| NM_181074    | <i>Lingo1</i>   | -0.15553936  | 0.040859693 | Mpst_Tg_Downregulation |
| NM_011207    | <i>Ptpn3</i>    | -0.155475919 | 0.013969413 | Mpst_Tg_Downregulation |
| NM_015730    | <i>Chrna4</i>   | -0.155470258 | 0.01356078  | Mpst_Tg_Downregulation |
| NM_015807    | <i>Nt5c</i>     | -0.155174881 | 0.033260178 | Mpst_Tg_Downregulation |
| NM_028705    | <i>Herc3</i>    | -0.154613863 | 0.039233691 | Mpst_Tg_Downregulation |
| NM_001081035 | <i>Nav3</i>     | -0.154054563 | 0.025071263 | Mpst_Tg_Downregulation |
| NM_053179    | <i>Nans</i>     | -0.153735509 | 0.04388278  | Mpst_Tg_Downregulation |
| NM_023500    | <i>Xk</i>       | -0.153337982 | 0.023749936 | Mpst_Tg_Downregulation |
| NM_009133    | <i>Stmn3</i>    | -0.153242949 | 0.00706875  | Mpst_Tg_Downregulation |
| NM_008255    | <i>Hmgcr</i>    | -0.152965683 | 0.009750254 | Mpst_Tg_Downregulation |
| NM_133939    | <i>Lsm8</i>     | -0.152898102 | 0.025687565 | Mpst_Tg_Downregulation |

|              |                      |              |             |                        |
|--------------|----------------------|--------------|-------------|------------------------|
| NM_001301737 | <i>Dnm1</i>          | -0.15197546  | 0.041354497 | Mpst_Tg_Downregulation |
| NM_013464    | <i>Ahr</i>           | -0.151703526 | 0.025665233 | Mpst_Tg_Downregulation |
| NM_001289653 | <i>Nell2</i>         | -0.151380568 | 0.004417285 | Mpst_Tg_Downregulation |
| NM_001164268 | <i>Kalrn</i>         | -0.150485594 | 0.017607892 | Mpst_Tg_Downregulation |
| NM_026662    | <i>Prps2</i>         | -0.150389819 | 0.0487736   | Mpst_Tg_Downregulation |
| NM_008730    | <i>Nptx1</i>         | -0.149806524 | 0.017660626 | Mpst_Tg_Downregulation |
| NM_026406    | <i>Rnf115</i>        | -0.149582158 | 0.007685946 | Mpst_Tg_Downregulation |
| NM_008792    | <i>Pcsk2</i>         | -0.149173287 | 0.005197477 | Mpst_Tg_Downregulation |
| NM_001034115 | <i>Shank1</i>        | -0.14875022  | 0.048938457 | Mpst_Tg_Downregulation |
| NM_008310    | <i>Htr1f</i>         | -0.148343114 | 0.025763399 | Mpst_Tg_Downregulation |
| NM_170756    | <i>Spata2</i>        | -0.148169101 | 0.012500857 | Mpst_Tg_Downregulation |
| NM_022029    | <i>Nrgn</i>          | -0.147849739 | 0.010026709 | Mpst_Tg_Downregulation |
| NM_010158    | <i>Khdrbs3</i>       | -0.14780173  | 0.012801427 | Mpst_Tg_Downregulation |
| NM_183147    | <i>Sprn</i>          | -0.147539393 | 0.015024978 | Mpst_Tg_Downregulation |
| NM_133972    | <i>Armc6</i>         | -0.147158326 | 0.027606478 | Mpst_Tg_Downregulation |
| NM_001007574 | <i>A830010M20Rik</i> | -0.147127136 | 0.04484315  | Mpst_Tg_Downregulation |
| NM_026618    | <i>Coa3</i>          | -0.146880717 | 0.019662965 | Mpst_Tg_Downregulation |
| NM_023051    | <i>Clstn1</i>        | -0.146838375 | 0.039616297 | Mpst_Tg_Downregulation |
| NM_001033305 | <i>Ndufb6</i>        | -0.146284471 | 0.038103691 | Mpst_Tg_Downregulation |
| NM_172687    | <i>Coq3</i>          | -0.146079424 | 0.044697769 | Mpst_Tg_Downregulation |
| NM_144900    | <i>Atp1a1</i>        | -0.145852125 | 0.025367619 | Mpst_Tg_Downregulation |
| NM_175357    | <i>Crbn</i>          | -0.144785772 | 0.044213663 | Mpst_Tg_Downregulation |
| NM_178939    | <i>Pdrg1</i>         | -0.144382447 | 0.048316435 | Mpst_Tg_Downregulation |
| NM_007936    | <i>Epha4</i>         | -0.14428816  | 0.005986371 | Mpst_Tg_Downregulation |
| NM_025994    | <i>Efh2</i>          | -0.143457149 | 0.023761895 | Mpst_Tg_Downregulation |
| NM_001083945 | <i>Rsph3b</i>        | -0.143443851 | 0.005885052 | Mpst_Tg_Downregulation |
| NM_177003    | <i>9630033F20Rik</i> | -0.143403602 | 0.022545219 | Mpst_Tg_Downregulation |
| NM_133248    | <i>Glmm</i>          | -0.143344525 | 0.011504191 | Mpst_Tg_Downregulation |
| NM_175259    | <i>Shisa4</i>        | -0.143163626 | 0.017674859 | Mpst_Tg_Downregulation |
| NM_011838    | <i>Lynx1</i>         | -0.143138559 | 0.028254479 | Mpst_Tg_Downregulation |
| NM_001024206 | <i>Trappc1</i>       | -0.143047781 | 0.018966841 | Mpst_Tg_Downregulation |
| NM_172266    | <i>Lpgat1</i>        | -0.142626426 | 0.037590142 | Mpst_Tg_Downregulation |
| NM_019824    | <i>Arpc3</i>         | -0.142625082 | 0.012383154 | Mpst_Tg_Downregulation |
| NM_172610    | <i>Mpped1</i>        | -0.14258034  | 0.010317998 | Mpst_Tg_Downregulation |
| NM_011293    | <i>Polr2j</i>        | -0.142536787 | 0.019057237 | Mpst_Tg_Downregulation |
| NM_010305    | <i>Gnail</i>         | -0.142088893 | 0.015705773 | Mpst_Tg_Downregulation |
| NM_025347    | <i>Ypel3</i>         | -0.141940825 | 0.039404586 | Mpst_Tg_Downregulation |
| NM_011428    | <i>Snap25</i>        | -0.141847655 | 0.007544207 | Mpst_Tg_Downregulation |
| NM_001081022 | <i>D430042O09Rik</i> | -0.141787712 | 0.00678262  | Mpst_Tg_Downregulation |
| NM_011035    | <i>Pak1</i>          | -0.141586891 | 0.017314445 | Mpst_Tg_Downregulation |
| NM_011967    | <i>Psm5</i>          | -0.14156806  | 0.01047383  | Mpst_Tg_Downregulation |
| NM_023526    | <i>Nkiras1</i>       | -0.140815389 | 0.005149024 | Mpst_Tg_Downregulation |
| NM_019816    | <i>Aatf</i>          | -0.140166832 | 0.033956393 | Mpst_Tg_Downregulation |
| NM_001290750 | <i>Rnf130</i>        | -0.139451763 | 0.022925281 | Mpst_Tg_Downregulation |
| NM_182993    | <i>Slc17a7</i>       | -0.138754447 | 0.007750293 | Mpst_Tg_Downregulation |
| NM_133778    | <i>Fam131a</i>       | -0.138369625 | 0.00737619  | Mpst_Tg_Downregulation |
| NM_026360    | <i>Ddx47</i>         | -0.137940043 | 0.005100824 | Mpst_Tg_Downregulation |
| NM_011352    | <i>Sema7a</i>        | -0.137888694 | 0.026414916 | Mpst_Tg_Downregulation |
| NM_153128    | <i>Klhl12</i>        | -0.137753344 | 0.033161054 | Mpst_Tg_Downregulation |
| NM_146168    | <i>Vopp1</i>         | -0.137353754 | 0.002118628 | Mpst_Tg_Downregulation |
| NM_001285813 | <i>Dtna</i>          | -0.13693105  | 0.04802815  | Mpst_Tg_Downregulation |
| NM_001199227 | <i>Osbp15</i>        | -0.136729546 | 0.033604098 | Mpst_Tg_Downregulation |
| NM_024220    | <i>Ndufc2</i>        | -0.136651619 | 0.040459432 | Mpst_Tg_Downregulation |
| NM_019535    | <i>Sh3gl2</i>        | -0.136555561 | 0.006451727 | Mpst_Tg_Downregulation |
| NM_178920    | <i>Mal2</i>          | -0.136354413 | 0.009607727 | Mpst_Tg_Downregulation |
| NM_010298    | <i>Glrb</i>          | -0.135728718 | 0.047755238 | Mpst_Tg_Downregulation |
| NM_176930    | <i>Nrcam</i>         | -0.135559258 | 0.009633633 | Mpst_Tg_Downregulation |
| NM_177893    | <i>Fan1</i>          | -0.13542429  | 0.023074709 | Mpst_Tg_Downregulation |
| NM_201357    | <i>Tssc1</i>         | -0.135415643 | 0.016090809 | Mpst_Tg_Downregulation |
| NM_180678    | <i>Gars</i>          | -0.135030855 | 0.004129292 | Mpst_Tg_Downregulation |
| NM_001164256 | <i>Tpm1</i>          | -0.134732711 | 0.038252753 | Mpst_Tg_Downregulation |
| NM_026638    | <i>Cdpt</i>          | -0.13350217  | 0.029697272 | Mpst_Tg_Downregulation |

|              |                      |              |             |                        |
|--------------|----------------------|--------------|-------------|------------------------|
| NM_134010    | <i>Nup107</i>        | -0.133071593 | 0.023707868 | Mpst_Tg_Downregulation |
| NM_008828    | <i>Pgk1</i>          | -0.133059228 | 0.02541593  | Mpst_Tg_Downregulation |
| NM_001195004 | <i>Kat7</i>          | -0.132784249 | 0.020570323 | Mpst_Tg_Downregulation |
| NM_008687    | <i>Nfib</i>          | -0.132782556 | 0.020667112 | Mpst_Tg_Downregulation |
| NM_009898    | <i>Coro1a</i>        | -0.13272506  | 0.049561318 | Mpst_Tg_Downregulation |
| NM_016801    | <i>Stx1a</i>         | -0.132361998 | 0.034745903 | Mpst_Tg_Downregulation |
| NM_025417    | <i>Commd4</i>        | -0.131735455 | 0.017417116 | Mpst_Tg_Downregulation |
| NM_009218    | <i>Sstr3</i>         | -0.131718066 | 0.018696279 | Mpst_Tg_Downregulation |
| NM_134091    | <i>Sgsm3</i>         | -0.131541925 | 0.042637158 | Mpst_Tg_Downregulation |
| NM_146130    | <i>Hnrnpa3</i>       | -0.131501284 | 0.043022631 | Mpst_Tg_Downregulation |
| NM_009193    | <i>Slbp</i>          | -0.131047551 | 0.037815145 | Mpst_Tg_Downregulation |
| NM_181850    | <i>Grm3</i>          | -0.130982825 | 0.017428364 | Mpst_Tg_Downregulation |
| NM_153534    | <i>Adcy2</i>         | -0.129917486 | 0.003175972 | Mpst_Tg_Downregulation |
| NM_177718    | <i>Mb21d2</i>        | -0.129911953 | 0.022220065 | Mpst_Tg_Downregulation |
| NM_207237    | <i>Man1c1</i>        | -0.129881636 | 0.03683878  | Mpst_Tg_Downregulation |
| NM_001142965 | <i>Frrs1l</i>        | -0.129835891 | 0.044558136 | Mpst_Tg_Downregulation |
| NM_027412    | <i>Ttc9c</i>         | -0.129626118 | 0.007428812 | Mpst_Tg_Downregulation |
| NM_009415    | <i>Tpi1</i>          | -0.129270597 | 0.027637679 | Mpst_Tg_Downregulation |
| NM_026303    | <i>Alkbh8</i>        | -0.129107308 | 0.040875799 | Mpst_Tg_Downregulation |
| NM_133700    | <i>Btd10</i>         | -0.129096262 | 0.049656722 | Mpst_Tg_Downregulation |
| NM_146165    | <i>Aimp2</i>         | -0.128971394 | 0.043942178 | Mpst_Tg_Downregulation |
| NM_172621    | <i>Clic5</i>         | -0.128871744 | 0.031768923 | Mpst_Tg_Downregulation |
| NM_021287    | <i>Sptbn2</i>        | -0.128684813 | 0.017485269 | Mpst_Tg_Downregulation |
| NM_011876    | <i>Twf2</i>          | -0.12858156  | 0.009445991 | Mpst_Tg_Downregulation |
| NM_173738    | <i>Zfp940</i>        | -0.128410073 | 0.034981462 | Mpst_Tg_Downregulation |
| NM_001289826 | <i>Clock</i>         | -0.128247597 | 0.039594576 | Mpst_Tg_Downregulation |
| NM_012021    | <i>Prdx5</i>         | -0.127466896 | 0.043383614 | Mpst_Tg_Downregulation |
| NM_139154    | <i>Rab40c</i>        | -0.12708663  | 0.04678123  | Mpst_Tg_Downregulation |
| NM_207625    | <i>Acs14</i>         | -0.126608614 | 0.049500685 | Mpst_Tg_Downregulation |
| NM_011510    | <i>Abcc8</i>         | -0.126434647 | 0.047334937 | Mpst_Tg_Downregulation |
| NM_175494    | <i>Zfp367</i>        | -0.125898811 | 0.029385072 | Mpst_Tg_Downregulation |
| NM_008323    | <i>Idh3g</i>         | -0.125688754 | 0.002218788 | Mpst_Tg_Downregulation |
| NM_181517    | <i>Ipo7</i>          | -0.125486275 | 0.03384173  | Mpst_Tg_Downregulation |
| NM_001081304 | <i>Atf6</i>          | -0.125332063 | 0.017262446 | Mpst_Tg_Downregulation |
| NM_025358    | <i>Ndufa9</i>        | -0.124277605 | 0.009340883 | Mpst_Tg_Downregulation |
| NM_019578    | <i>Extl1</i>         | -0.12388593  | 0.031115345 | Mpst_Tg_Downregulation |
| NM_133783    | <i>Ptges2</i>        | -0.123756731 | 0.032935666 | Mpst_Tg_Downregulation |
| NM_009897    | <i>Ckmt1</i>         | -0.123567818 | 0.045805325 | Mpst_Tg_Downregulation |
| NM_009447    | <i>Tuba4a</i>        | -0.123328639 | 0.034735476 | Mpst_Tg_Downregulation |
| NM_025494    | <i>Atp6v1c1</i>      | -0.12329249  | 0.02918633  | Mpst_Tg_Downregulation |
| NM_025403    | <i>Nop10</i>         | -0.123138725 | 0.022698617 | Mpst_Tg_Downregulation |
| NM_022992    | <i>Arl6ip5</i>       | -0.123031612 | 0.010457441 | Mpst_Tg_Downregulation |
| NM_030004    | <i>Cryl1</i>         | -0.123002207 | 0.03524027  | Mpst_Tg_Downregulation |
| NM_030252    | <i>Smim12</i>        | -0.122954602 | 0.029416558 | Mpst_Tg_Downregulation |
| NM_026330    | <i>Nsmce1</i>        | -0.122566413 | 0.023769388 | Mpst_Tg_Downregulation |
| NM_024260    | <i>Ccdc132</i>       | -0.122531769 | 0.032641256 | Mpst_Tg_Downregulation |
| NM_009729    | <i>Atp6v0c</i>       | -0.122400391 | 0.045484085 | Mpst_Tg_Downregulation |
| NM_019580    | <i>Gde1</i>          | -0.122209408 | 0.002372635 | Mpst_Tg_Downregulation |
| NM_022653    | <i>Thop1</i>         | -0.122006373 | 0.030871444 | Mpst_Tg_Downregulation |
| NM_026519    | <i>Emc4</i>          | -0.121617887 | 0.00847282  | Mpst_Tg_Downregulation |
| NM_001081277 | <i>Ak5</i>           | -0.120779371 | 0.044027846 | Mpst_Tg_Downregulation |
| NM_173430    | <i>Fkrp</i>          | -0.120708385 | 0.045476001 | Mpst_Tg_Downregulation |
| NM_008923    | <i>Prkar1b</i>       | -0.120619674 | 0.011961177 | Mpst_Tg_Downregulation |
| NM_145371    | <i>Eif2b1</i>        | -0.120559976 | 0.041459327 | Mpst_Tg_Downregulation |
| NM_001135100 | <i>I134</i>          | -0.119690105 | 0.035202004 | Mpst_Tg_Downregulation |
| NM_133999    | <i>Fig4</i>          | -0.119477046 | 0.028184634 | Mpst_Tg_Downregulation |
| NM_144838    | <i>Sgtb</i>          | -0.119409188 | 0.031156876 | Mpst_Tg_Downregulation |
| NM_183146    | <i>A530054K11Rik</i> | -0.119328746 | 0.010300083 | Mpst_Tg_Downregulation |
| NM_028142    | <i>Nsun4</i>         | -0.119235643 | 0.048610493 | Mpst_Tg_Downregulation |
| NM_172656    | <i>Stradb</i>        | -0.11921804  | 0.01191933  | Mpst_Tg_Downregulation |
| NM_001243769 | <i>Cdc42</i>         | -0.119211844 | 0.038655859 | Mpst_Tg_Downregulation |
| NM_027439    | <i>Atp6ap2</i>       | -0.118966981 | 0.004475117 | Mpst_Tg_Downregulation |

|              |                      |              |             |                        |
|--------------|----------------------|--------------|-------------|------------------------|
| NM_007804    | <i>Cux2</i>          | -0.118832595 | 0.029567165 | Mpst_Tg_Downregulation |
| NM_028292    | <i>Ppme1</i>         | -0.118563881 | 0.017543067 | Mpst_Tg_Downregulation |
| NM_001290810 | <i>Mrto4</i>         | -0.118548243 | 0.049035296 | Mpst_Tg_Downregulation |
| NM_007508    | <i>Atp6v1a</i>       | -0.118272495 | 0.041627464 | Mpst_Tg_Downregulation |
| NM_025882    | <i>Pole4</i>         | -0.118052762 | 0.045573418 | Mpst_Tg_Downregulation |
| NM_023328    | <i>Agtpbp1</i>       | -0.117063954 | 0.009109281 | Mpst_Tg_Downregulation |
| NM_026502    | <i>1110004E09Rik</i> | -0.116868237 | 0.024175057 | Mpst_Tg_Downregulation |
| NM_134137    | <i>Lars</i>          | -0.116052023 | 0.021121359 | Mpst_Tg_Downregulation |
| NM_026430    | <i>Uxs1</i>          | -0.115634676 | 0.029821338 | Mpst_Tg_Downregulation |
| NM_172290    | <i>Ntm</i>           | -0.115171518 | 0.029612195 | Mpst_Tg_Downregulation |
| NM_001109749 | <i>Cntn4</i>         | -0.115155501 | 0.022705013 | Mpst_Tg_Downregulation |
| NM_009622    | <i>Adcy1</i>         | -0.114766662 | 0.041812537 | Mpst_Tg_Downregulation |
| NM_012055    | <i>Asns</i>          | -0.114372355 | 0.001484293 | Mpst_Tg_Downregulation |
| NM_026329    | <i>Polr2g</i>        | -0.114242986 | 0.011702807 | Mpst_Tg_Downregulation |
| NM_001026212 | <i>Ensa</i>          | -0.114239925 | 0.021362604 | Mpst_Tg_Downregulation |
| NM_007981    | <i>Acs11</i>         | -0.114138016 | 0.032257126 | Mpst_Tg_Downregulation |
| NM_001112705 | <i>Tlk2</i>          | -0.113494574 | 0.036174464 | Mpst_Tg_Downregulation |
| NM_001142950 | <i>Nars</i>          | -0.112773821 | 0.037881064 | Mpst_Tg_Downregulation |
| NM_182839    | <i>Tppp</i>          | -0.112713326 | 0.012135633 | Mpst_Tg_Downregulation |
| NM_001024474 | <i>Diras2</i>        | -0.112149225 | 0.017938057 | Mpst_Tg_Downregulation |
| NM_025959    | <i>Psmc6</i>         | -0.111943356 | 0.037281535 | Mpst_Tg_Downregulation |
| NM_130884    | <i>Idh3b</i>         | -0.111824714 | 0.006755186 | Mpst_Tg_Downregulation |
| NM_019584    | <i>Becn1</i>         | -0.111571766 | 0.000193774 | Mpst_Tg_Downregulation |
| NM_175752    | <i>Chn1</i>          | -0.111419701 | 0.011986213 | Mpst_Tg_Downregulation |
| NM_024475    | <i>Ublcp1</i>        | -0.111130616 | 0.029975434 | Mpst_Tg_Downregulation |
| NM_008618    | <i>Mdh1</i>          | -0.110950068 | 0.034749891 | Mpst_Tg_Downregulation |
| NM_007590    | <i>Calm3</i>         | -0.110769631 | 0.01882291  | Mpst_Tg_Downregulation |
| NM_019967    | <i>Brinp1</i>        | -0.110715719 | 0.028545894 | Mpst_Tg_Downregulation |
| NM_019754    | <i>Tagln3</i>        | -0.11025249  | 0.009465098 | Mpst_Tg_Downregulation |
| NM_018818    | <i>Chm</i>           | -0.110134747 | 0.036145943 | Mpst_Tg_Downregulation |
| NM_153459    | <i>Dusp7</i>         | -0.110027716 | 0.045285898 | Mpst_Tg_Downregulation |
| NM_029505    | <i>Ap3m2</i>         | -0.109889226 | 0.031842376 | Mpst_Tg_Downregulation |
| NM_183285    | <i>Kctd2</i>         | -0.109882646 | 0.024932365 | Mpst_Tg_Downregulation |
| NM_199199    | <i>Tmem199</i>       | -0.109831132 | 0.044735105 | Mpst_Tg_Downregulation |
| NM_177325    | <i>Tsr1</i>          | -0.109683352 | 0.04094662  | Mpst_Tg_Downregulation |
| NM_018788    | <i>Extl3</i>         | -0.109561997 | 0.010274474 | Mpst_Tg_Downregulation |
| NM_026272    | <i>Narf</i>          | -0.109557462 | 0.00164371  | Mpst_Tg_Downregulation |
| NM_027886    | <i>Stk11ip</i>       | -0.108965361 | 0.020906    | Mpst_Tg_Downregulation |
| NM_011181    | <i>Cyth2</i>         | -0.108911969 | 0.038152566 | Mpst_Tg_Downregulation |
| NM_007547    | <i>Sirpa</i>         | -0.108891719 | 0.007087499 | Mpst_Tg_Downregulation |
| NM_026056    | <i>Cap2</i>          | -0.108769063 | 0.032198457 | Mpst_Tg_Downregulation |
| NM_030254    | <i>Tusc3</i>         | -0.108578659 | 0.013013161 | Mpst_Tg_Downregulation |
| NM_027375    | <i>Gcc2</i>          | -0.108123203 | 0.030618013 | Mpst_Tg_Downregulation |
| NR_002890    | <i>Gm12070</i>       | -0.107988724 | 0.045506586 | Mpst_Tg_Downregulation |
| NM_001110240 | <i>Slc24a2</i>       | -0.1079869   | 0.049492982 | Mpst_Tg_Downregulation |
| NM_153542    | <i>Lrrc20</i>        | -0.107598912 | 0.015946817 | Mpst_Tg_Downregulation |
| NM_026735    | <i>Mob1b</i>         | -0.107105123 | 0.0329543   | Mpst_Tg_Downregulation |
| NM_019811    | <i>Acs2</i>          | -0.107084702 | 0.010292814 | Mpst_Tg_Downregulation |
| NM_013715    | <i>Cops5</i>         | -0.107031714 | 0.027552012 | Mpst_Tg_Downregulation |
| NM_001001885 | <i>Tmem151a</i>      | -0.106727925 | 0.043570415 | Mpst_Tg_Downregulation |
| NM_029920    | <i>Mtus2</i>         | -0.106655796 | 0.001460254 | Mpst_Tg_Downregulation |
| NM_175561    | <i>Penx12</i>        | -0.106615834 | 0.003289426 | Mpst_Tg_Downregulation |
| NM_019703    | <i>Pfkip</i>         | -0.106188837 | 0.035751828 | Mpst_Tg_Downregulation |
| NM_018743    | <i>Agpat6</i>        | -0.106042435 | 0.019838048 | Mpst_Tg_Downregulation |
| NM_138306    | <i>Dgkz</i>          | -0.10579696  | 0.028266393 | Mpst_Tg_Downregulation |
| NM_025808    | <i>Lztr1</i>         | -0.105667757 | 0.021696058 | Mpst_Tg_Downregulation |
| NM_001199676 | <i>Camkk2</i>        | -0.105636925 | 0.032077306 | Mpst_Tg_Downregulation |
| NM_176928    | <i>Brwd1</i>         | -0.104986574 | 0.045777508 | Mpst_Tg_Downregulation |
| NM_029665    | <i>Ipo11</i>         | -0.10486486  | 0.033430209 | Mpst_Tg_Downregulation |
| NM_001081282 | <i>Ibtk</i>          | -0.10461561  | 0.019988283 | Mpst_Tg_Downregulation |
| NM_028097    | <i>Tmem68</i>        | -0.10451479  | 0.031850148 | Mpst_Tg_Downregulation |
| NM_023119    | <i>Eno1</i>          | -0.104310956 | 0.045990549 | Mpst_Tg_Downregulation |

|              |                 |              |             |                        |
|--------------|-----------------|--------------|-------------|------------------------|
| NM_181415    | <i>Atrnl1</i>   | -0.104272608 | 0.02511101  | Mpst_Tg_Downregulation |
| NM_019780    | <i>Vps29</i>    | -0.104184709 | 0.00773795  | Mpst_Tg_Downregulation |
| NM_007589    | <i>Calm2</i>    | -0.104020732 | 0.036097988 | Mpst_Tg_Downregulation |
| NM_008551    | <i>Mapkapk2</i> | -0.10400443  | 0.031622499 | Mpst_Tg_Downregulation |
| NM_133826    | <i>Atp6v1h</i>  | -0.103692848 | 0.013343954 | Mpst_Tg_Downregulation |
| NM_152810    | <i>Cdc5l</i>    | -0.103464795 | 0.025007912 | Mpst_Tg_Downregulation |
| NM_001163487 | <i>Pfkm</i>     | -0.103441669 | 0.0443305   | Mpst_Tg_Downregulation |
| NM_009382    | <i>Thy1</i>     | -0.103217837 | 0.022222847 | Mpst_Tg_Downregulation |
| NM_025337    | <i>Akr7a5</i>   | -0.103200188 | 0.039279279 | Mpst_Tg_Downregulation |
| NM_026545    | <i>Psmc8</i>    | -0.103135319 | 0.030554078 | Mpst_Tg_Downregulation |
| NM_025976    | <i>Bfar</i>     | -0.101985093 | 0.009938944 | Mpst_Tg_Downregulation |
| NM_011506    | <i>Sucla2</i>   | -0.101880065 | 0.035722667 | Mpst_Tg_Downregulation |
| NM_025542    | <i>Rtfdc1</i>   | -0.101684377 | 0.016524413 | Mpst_Tg_Downregulation |
| NM_009157    | <i>Map2k4</i>   | -0.101501633 | 0.021771812 | Mpst_Tg_Downregulation |
| NM_026737    | <i>Phf5a</i>    | -0.100940577 | 0.038591348 | Mpst_Tg_Downregulation |
| NM_018811    | <i>Abhd2</i>    | -0.100739336 | 0.011051709 | Mpst_Tg_Downregulation |
| NM_178628    | <i>Atil1</i>    | -0.100232195 | 0.038250694 | Mpst_Tg_Downregulation |
| NM_172723    | <i>Adap1</i>    | -0.099897571 | 0.005510389 | Mpst_Tg_Downregulation |
| NM_146107    | <i>Actr1b</i>   | -0.099811025 | 0.034603034 | Mpst_Tg_Downregulation |
| NM_178635    | <i>Uvrag</i>    | -0.099779068 | 0.0428808   | Mpst_Tg_Downregulation |
| NM_007808    | <i>Cycs</i>     | -0.099391566 | 0.011576816 | Mpst_Tg_Downregulation |
| NM_025418    | <i>Vta1</i>     | -0.098839897 | 0.024360537 | Mpst_Tg_Downregulation |
| NM_001205361 | <i>Dcun1d1</i>  | -0.09868952  | 0.013219269 | Mpst_Tg_Downregulation |
| NM_019913    | <i>Txn2</i>     | -0.098111849 | 0.046209441 | Mpst_Tg_Downregulation |
| NM_001081045 | <i>Kansl1</i>   | -0.097482429 | 0.011494617 | Mpst_Tg_Downregulation |
| NM_025283    | <i>Mob4</i>     | -0.097338576 | 0.0215181   | Mpst_Tg_Downregulation |
| NM_018871    | <i>Ywhag</i>    | -0.097248971 | 0.041654879 | Mpst_Tg_Downregulation |
| NM_019571    | <i>Tspan5</i>   | -0.096597959 | 0.027057882 | Mpst_Tg_Downregulation |
| NM_026095    | <i>Snrpd3</i>   | -0.096475734 | 0.025903319 | Mpst_Tg_Downregulation |
| NM_013556    | <i>Hprt</i>     | -0.096245562 | 0.029120968 | Mpst_Tg_Downregulation |
| NM_010972    | <i>Sort1</i>    | -0.096114152 | 0.042326544 | Mpst_Tg_Downregulation |
| NM_001014973 | <i>Sux13</i>    | -0.09555263  | 0.038248497 | Mpst_Tg_Downregulation |
| NM_133722    | <i>Abhd17c</i>  | -0.095103237 | 0.035744652 | Mpst_Tg_Downregulation |
| NM_028664    | <i>Ankrd45</i>  | -0.094833004 | 0.010669775 | Mpst_Tg_Downregulation |
| NM_207583    | <i>Brinp2</i>   | -0.09440623  | 0.049236452 | Mpst_Tg_Downregulation |
| NM_133764    | <i>Atp6v0e2</i> | -0.094248809 | 0.013572522 | Mpst_Tg_Downregulation |
| NM_172595    | <i>Arl15</i>    | -0.094071489 | 0.012777551 | Mpst_Tg_Downregulation |
| NM_007698    | <i>Chrm1</i>    | -0.093142219 | 0.035688104 | Mpst_Tg_Downregulation |
| NM_134101    | <i>Psmc2</i>    | -0.092949638 | 0.045839801 | Mpst_Tg_Downregulation |
| NM_178624    | <i>Fbxl2</i>    | -0.092946458 | 0.016275268 | Mpst_Tg_Downregulation |
| NM_029645    | <i>Gatc</i>     | -0.09283744  | 0.024684954 | Mpst_Tg_Downregulation |
| NM_144534    | <i>Tmem38a</i>  | -0.092731391 | 0.037045156 | Mpst_Tg_Downregulation |
| NM_001035228 | <i>St3gal5</i>  | -0.092647335 | 0.032180899 | Mpst_Tg_Downregulation |
| NM_013812    | <i>Cdk2ap1</i>  | -0.092555848 | 0.032666006 | Mpst_Tg_Downregulation |
| NM_023579    | <i>Ipo5</i>     | -0.092339456 | 0.010778227 | Mpst_Tg_Downregulation |
| NM_011738    | <i>Ywhah</i>    | -0.092159199 | 0.027211958 | Mpst_Tg_Downregulation |
| NM_025987    | <i>Ndufa6</i>   | -0.091745877 | 0.026229025 | Mpst_Tg_Downregulation |
| NM_007450    | <i>Slc25a4</i>  | -0.091703199 | 0.022488812 | Mpst_Tg_Downregulation |
| NM_025898    | <i>Napa</i>     | -0.091353901 | 0.028361444 | Mpst_Tg_Downregulation |
| NM_028207    | <i>Dusp3</i>    | -0.090563736 | 0.043648587 | Mpst_Tg_Downregulation |
| NM_010687    | <i>Large</i>    | -0.090420523 | 0.006223962 | Mpst_Tg_Downregulation |
| NM_001004365 | <i>Actr3b</i>   | -0.090111563 | 0.026755637 | Mpst_Tg_Downregulation |
| NM_054097    | <i>Pip4k2c</i>  | -0.089996721 | 0.035596689 | Mpst_Tg_Downregulation |
| NM_134040    | <i>Ddx1</i>     | -0.089616604 | 0.029211159 | Mpst_Tg_Downregulation |
| NM_172920    | <i>Dpy19l1</i>  | -0.089607286 | 0.048671971 | Mpst_Tg_Downregulation |
| NM_029478    | <i>Vmp1</i>     | -0.089421636 | 0.029652902 | Mpst_Tg_Downregulation |
| NM_025589    | <i>Rpl36al</i>  | -0.088170993 | 0.042810646 | Mpst_Tg_Downregulation |
| NM_019668    | <i>Ube2a</i>    | -0.087853057 | 0.019137353 | Mpst_Tg_Downregulation |
| NM_026157    | <i>Mtpap</i>    | -0.087782222 | 0.030082536 | Mpst_Tg_Downregulation |
| NM_001098476 | <i>Grsf1</i>    | -0.087521697 | 0.037476806 | Mpst_Tg_Downregulation |
| NM_001159591 | <i>Csnk1g2</i>  | -0.08751045  | 0.038300198 | Mpst_Tg_Downregulation |
| NM_026374    | <i>Ilf2</i>     | -0.087269301 | 0.017534292 | Mpst_Tg_Downregulation |



|              |                      |              |             |                        |
|--------------|----------------------|--------------|-------------|------------------------|
| NM_001302970 | <i>Ap2m1</i>         | -0.086833961 | 0.013758707 | Mpst_Tg_Downregulation |
| NM_021526    | <i>Psmc14</i>        | -0.086832984 | 0.032457237 | Mpst_Tg_Downregulation |
| NM_213614    | <i>Sept5</i>         | -0.086160961 | 0.003181681 | Mpst_Tg_Downregulation |
| NM_145544    | <i>Rap1gds1</i>      | -0.08572457  | 0.037196473 | Mpst_Tg_Downregulation |
| NM_026178    | <i>Mmd</i>           | -0.08527577  | 0.034891393 | Mpst_Tg_Downregulation |
| NM_019742    | <i>Tusc2</i>         | -0.084223596 | 0.017809536 | Mpst_Tg_Downregulation |
| NM_026620    | <i>Fam98b</i>        | -0.083957679 | 0.02362829  | Mpst_Tg_Downregulation |
| NM_144518    | <i>2900011O08Rik</i> | -0.083586744 | 0.042669691 | Mpst_Tg_Downregulation |
| NM_020569    | <i>Park7</i>         | -0.0830706   | 0.03197068  | Mpst_Tg_Downregulation |
| NM_023179    | <i>Atp6v1g2</i>      | -0.082672119 | 0.016790598 | Mpst_Tg_Downregulation |
| NM_153407    | <i>Csrnp2</i>        | -0.082654788 | 0.016621739 | Mpst_Tg_Downregulation |
| NR_104484    | <i>Erc1</i>          | -0.082599531 | 0.005780266 | Mpst_Tg_Downregulation |
| NM_175104    | <i>Fam53c</i>        | -0.082590503 | 0.016135495 | Mpst_Tg_Downregulation |
| NM_201371    | <i>Prmt8</i>         | -0.082273854 | 0.042776405 | Mpst_Tg_Downregulation |
| NM_018883    | <i>Camkk1</i>        | -0.082053391 | 0.010470004 | Mpst_Tg_Downregulation |
| NM_133907    | <i>Ube3c</i>         | -0.081929035 | 0.006588399 | Mpst_Tg_Downregulation |
| NM_026048    | <i>Cinp</i>          | -0.081621107 | 0.017609861 | Mpst_Tg_Downregulation |
| NM_013562    | <i>Ifrd1</i>         | -0.081566816 | 0.049941976 | Mpst_Tg_Downregulation |
| NM_013477    | <i>Atp6v0d1</i>      | -0.08129969  | 0.037531594 | Mpst_Tg_Downregulation |
| NM_133905    | <i>Papd4</i>         | -0.081105705 | 0.03567825  | Mpst_Tg_Downregulation |
| NM_053076    | <i>Rtm3</i>          | -0.080424978 | 0.03398971  | Mpst_Tg_Downregulation |
| NM_011188    | <i>Psmc2</i>         | -0.080388505 | 0.013556679 | Mpst_Tg_Downregulation |
| NM_019961    | <i>Pex3</i>          | -0.078859121 | 0.036136272 | Mpst_Tg_Downregulation |
| NM_001033213 | <i>Ttc7b</i>         | -0.078410726 | 0.022369955 | Mpst_Tg_Downregulation |
| NM_001177667 | <i>Sptan1</i>        | -0.078396043 | 0.023664499 | Mpst_Tg_Downregulation |
| NM_019914    | <i>Mllt11</i>        | -0.077928494 | 0.001784125 | Mpst_Tg_Downregulation |
| NM_175226    | <i>Rnf139</i>        | -0.077241446 | 0.013733748 | Mpst_Tg_Downregulation |
| NM_172784    | <i>Lrp11</i>         | -0.076775973 | 0.008846998 | Mpst_Tg_Downregulation |
| NM_018740    | <i>Elp5</i>          | -0.075923374 | 0.030242431 | Mpst_Tg_Downregulation |
| NM_020050    | <i>Tmem9b</i>        | -0.075760925 | 0.01429559  | Mpst_Tg_Downregulation |
| NM_007509    | <i>Atp6v1b2</i>      | -0.075733455 | 0.043867124 | Mpst_Tg_Downregulation |
| NM_008810    | <i>Pdhal</i>         | -0.075666812 | 0.048172588 | Mpst_Tg_Downregulation |
| NM_144786    | <i>Ggt7</i>          | -0.074703446 | 0.047638349 | Mpst_Tg_Downregulation |
| NM_025997    | <i>Fam103a1</i>      | -0.07438395  | 0.039099878 | Mpst_Tg_Downregulation |
| NM_197987    | <i>Trim37</i>        | -0.073549345 | 0.025970201 | Mpst_Tg_Downregulation |
| NM_029157    | <i>Sf3a3</i>         | -0.072786907 | 0.044470341 | Mpst_Tg_Downregulation |
| NM_001007596 | <i>Rtm1</i>          | -0.072335791 | 0.011830792 | Mpst_Tg_Downregulation |
| NM_021435    | <i>Slc35b4</i>       | -0.071985374 | 0.031702734 | Mpst_Tg_Downregulation |
| NM_146200    | <i>Eif3c</i>         | -0.071751674 | 0.035604345 | Mpst_Tg_Downregulation |
| NM_021463    | <i>Prps1</i>         | -0.07099291  | 0.014761718 | Mpst_Tg_Downregulation |
| NM_173406    | <i>Jazf1</i>         | -0.070397972 | 0.041951654 | Mpst_Tg_Downregulation |
| NM_013686    | <i>Tcp1</i>          | -0.070205986 | 0.016781232 | Mpst_Tg_Downregulation |
| NM_020578    | <i>Ehd3</i>          | -0.068208153 | 0.031155422 | Mpst_Tg_Downregulation |
| NM_027130    | <i>Afg3l2</i>        | -0.066716688 | 0.039076086 | Mpst_Tg_Downregulation |
| NM_030018    | <i>Tmem50b</i>       | -0.065647068 | 0.03623429  | Mpst_Tg_Downregulation |
| NM_001029934 | <i>Usp32</i>         | -0.0654345   | 0.039891817 | Mpst_Tg_Downregulation |
| NM_001081203 | <i>Sbno1</i>         | -0.065292728 | 0.007186453 | Mpst_Tg_Downregulation |
| NM_027258    | <i>Rnf157</i>        | -0.065114184 | 0.047512884 | Mpst_Tg_Downregulation |
| NM_009031    | <i>Rbbp7</i>         | -0.064090793 | 0.023669037 | Mpst_Tg_Downregulation |
| NM_133789    | <i>Strn4</i>         | -0.063827687 | 0.014877734 | Mpst_Tg_Downregulation |
| NM_023374    | <i>Sdhb</i>          | -0.063554817 | 0.04832766  | Mpst_Tg_Downregulation |
| NM_025558    | <i>Cyb5b</i>         | -0.063278069 | 0.012283675 | Mpst_Tg_Downregulation |
| NM_001001181 | <i>BC031181</i>      | -0.061327837 | 0.036410486 | Mpst_Tg_Downregulation |
| NM_018804    | <i>Syt11</i>         | -0.058176952 | 0.014705177 | Mpst_Tg_Downregulation |
| NM_028759    | <i>Dcaf6</i>         | -0.058013147 | 0.045684469 | Mpst_Tg_Downregulation |
| NM_012003    | <i>Cops7a</i>        | -0.053618457 | 0.028129707 | Mpst_Tg_Downregulation |
| NM_178367    | <i>Dhx33</i>         | -0.053565352 | 0.021116397 | Mpst_Tg_Downregulation |
| NM_023764    | <i>Tollip</i>        | -0.052003077 | 0.009498931 | Mpst_Tg_Downregulation |
| NM_020332    | <i>Ank</i>           | -0.049006341 | 0.045336741 | Mpst_Tg_Downregulation |
| NM_173781    | <i>Rab6b</i>         | -0.048855791 | 0.038624278 | Mpst_Tg_Downregulation |
| NM_172994    | <i>Ppp2r2c</i>       | -0.046915209 | 0.046238508 | Mpst_Tg_Downregulation |
| NM_001013380 | <i>Dync1li2</i>      | -0.045821183 | 0.009406911 | Mpst_Tg_Downregulation |

|              |                      |              |             |                        |
|--------------|----------------------|--------------|-------------|------------------------|
| NM_173180    | <i>Pmpca</i>         | -0.044934372 | 0.049000257 | Mpst_Tg_Downregulation |
| NM_001166591 | <i>Eif5a</i>         | 7.387618308  | 0.005075079 | Mpst_Tg_upregulation   |
| NM_001163488 | <i>Pfkm</i>          | 6.897949734  | 0.014506251 | Mpst_Tg_upregulation   |
| NM_032460    | <i>Gpank1</i>        | 6.598013966  | 0.014335423 | Mpst_Tg_upregulation   |
| NM_001290799 | <i>Inpp4a</i>        | 6.279024556  | 0.024938186 | Mpst_Tg_upregulation   |
| NM_009732    | <i>Avp</i>           | 6.273780295  | 0.049380838 | Mpst_Tg_upregulation   |
| NM_001304774 | <i>Pex26</i>         | 6.051214751  | 0.014183093 | Mpst_Tg_upregulation   |
| NM_138670    | <i>Mpst</i>          | 5.741195897  | 0.00362056  | Mpst_Tg_upregulation   |
| NR_028297    | <i>Fance</i>         | 5.517812722  | 0.039142146 | Mpst_Tg_upregulation   |
| NM_013634    | <i>Med1</i>          | 5.395702713  | 0.018083964 | Mpst_Tg_upregulation   |
| NM_133759    | <i>Zbtb3</i>         | 5.324239059  | 0.047403772 | Mpst_Tg_upregulation   |
| NM_001256518 | <i>Zfp672</i>        | 4.846993934  | 0.047395517 | Mpst_Tg_upregulation   |
| NM_001276485 | <i>Dag1</i>          | 3.890312153  | 0.02286984  | Mpst_Tg_upregulation   |
| NM_001162493 | <i>Mpst</i>          | 2.390038181  | 0.000263594 | Mpst_Tg_upregulation   |
| NM_001293780 | <i>Chtop</i>         | 1.664779482  | 0.010504483 | Mpst_Tg_upregulation   |
| NM_177914    | <i>Dgkk</i>          | 1.464243276  | 0.048439822 | Mpst_Tg_upregulation   |
| NM_001042614 | <i>Sepp1</i>         | 1.458120113  | 0.013140222 | Mpst_Tg_upregulation   |
| NR_046280    | <i>Zfp672</i>        | 1.397928738  | 0.006991662 | Mpst_Tg_upregulation   |
| NM_001142760 | <i>Pcdh15</i>        | 1.38448399   | 0.012854497 | Mpst_Tg_upregulation   |
| NM_001167925 | <i>A730017C20Rik</i> | 1.315168087  | 0.001064471 | Mpst_Tg_upregulation   |
| NM_001163270 | <i>Baiap3</i>        | 1.267900359  | 0.033980754 | Mpst_Tg_upregulation   |
| NM_001302207 | <i>Flii</i>          | 1.20898847   | 0.00844587  | Mpst_Tg_upregulation   |
| NM_001289432 | <i>Cipc</i>          | 1.171724134  | 0.018761239 | Mpst_Tg_upregulation   |
| NM_001287058 | <i>Vegfa</i>         | 1.110373362  | 0.028313192 | Mpst_Tg_upregulation   |
| NM_013496    | <i>Crabp1</i>        | 1.079916709  | 0.000925227 | Mpst_Tg_upregulation   |
| NM_001287800 | <i>Fhl1</i>          | 1.068758262  | 0.024268346 | Mpst_Tg_upregulation   |
| NM_001291121 | <i>Epb4.1l1</i>      | 1.055073392  | 0.046050147 | Mpst_Tg_upregulation   |
| NM_001289695 | <i>Zfp740</i>        | 1.043149782  | 0.023762694 | Mpst_Tg_upregulation   |
| NM_007428    | <i>Agt</i>           | 0.994176275  | 0.017304934 | Mpst_Tg_upregulation   |
| NM_001159941 | <i>Kctd10</i>        | 0.992524297  | 0.048002719 | Mpst_Tg_upregulation   |
| NM_008316    | <i>Hus1</i>          | 0.975106622  | 0.000995095 | Mpst_Tg_upregulation   |
| NR_033144    | <i>4921524J17Rik</i> | 0.971535691  | 0.028070939 | Mpst_Tg_upregulation   |
| NM_175363    | <i>Pphn1</i>         | 0.941852264  | 0.031415234 | Mpst_Tg_upregulation   |
| NM_001291238 | <i>Cux1</i>          | 0.918689031  | 0.007379071 | Mpst_Tg_upregulation   |
| NM_001034962 | <i>Sorbs1</i>        | 0.912009989  | 0.031879948 | Mpst_Tg_upregulation   |
| NM_025312    | <i>Sostdc1</i>       | 0.908001672  | 0.032714356 | Mpst_Tg_upregulation   |
| NM_001134461 | <i>Prickle2</i>      | 0.880895259  | 0.010020172 | Mpst_Tg_upregulation   |
| NM_013758    | <i>Add3</i>          | 0.879950327  | 0.0208621   | Mpst_Tg_upregulation   |
| NM_026082    | <i>Dock7</i>         | 0.874812809  | 0.036486588 | Mpst_Tg_upregulation   |
| NM_015749    | <i>Ten2</i>          | 0.862496042  | 0.025449109 | Mpst_Tg_upregulation   |
| NM_021382    | <i>Tacr3</i>         | 0.823570365  | 0.024639904 | Mpst_Tg_upregulation   |
| NM_001286541 | <i>Sigmar1</i>       | 0.806214553  | 0.041451751 | Mpst_Tg_upregulation   |
| NM_013823    | <i>Kl</i>            | 0.803050575  | 0.019636849 | Mpst_Tg_upregulation   |
| NM_053270    | <i>Rims1</i>         | 0.765630812  | 0.006792607 | Mpst_Tg_upregulation   |
| NM_013484    | <i>C2</i>            | 0.749006642  | 0.031037923 | Mpst_Tg_upregulation   |
| NM_026868    | <i>Abhd13</i>        | 0.737236379  | 0.020408003 | Mpst_Tg_upregulation   |
| NM_001122989 | <i>Cdc14b</i>        | 0.733142503  | 0.002711153 | Mpst_Tg_upregulation   |
| NM_173052    | <i>Serp1b1b</i>      | 0.72735553   | 0.010714314 | Mpst_Tg_upregulation   |
| NM_016862    | <i>Vt1a</i>          | 0.719758779  | 0.01049632  | Mpst_Tg_upregulation   |
| NM_026952    | <i>Cdk12</i>         | 0.705692574  | 0.03285241  | Mpst_Tg_upregulation   |
| NM_023440    | <i>Tmem86b</i>       | 0.699949035  | 0.004671201 | Mpst_Tg_upregulation   |
| NM_001294323 | <i>Zfp2</i>          | 0.694446568  | 0.010842953 | Mpst_Tg_upregulation   |
| NM_177981    | <i>Hap1</i>          | 0.688415241  | 0.019065438 | Mpst_Tg_upregulation   |
| NM_001025382 | <i>Fam196b</i>       | 0.686647266  | 0.033222659 | Mpst_Tg_upregulation   |
| NM_001193659 | <i>Cldn12</i>        | 0.678902242  | 0.04660872  | Mpst_Tg_upregulation   |
| NM_031875    | <i>Otof</i>          | 0.677000809  | 0.030801955 | Mpst_Tg_upregulation   |
| NM_001276681 | <i>Syr6</i>          | 0.672855894  | 0.035017804 | Mpst_Tg_upregulation   |
| NR_125833    | <i>Clasrp</i>        | 0.671998313  | 0.004108149 | Mpst_Tg_upregulation   |
| NM_144917    | <i>Elmod3</i>        | 0.658132847  | 0.027044028 | Mpst_Tg_upregulation   |
| NR_027853    | <i>Clk1</i>          | 0.646661648  | 0.002928094 | Mpst_Tg_upregulation   |
| NM_001291930 | <i>Adora1</i>        | 0.645960006  | 0.015239215 | Mpst_Tg_upregulation   |
| NM_001205236 | <i>Arhgap27</i>      | 0.638662152  | 0.016029041 | Mpst_Tg_upregulation   |

|              |                      |             |             |                      |
|--------------|----------------------|-------------|-------------|----------------------|
| NM_009697    | <i>Nr2f2</i>         | 0.621934897 | 0.011010098 | Mpst_Tg_upregulation |
| NR_033218    | <i>Rreb1</i>         | 0.621245905 | 0.026771071 | Mpst_Tg_upregulation |
| NR_002167    | <i>E530001F21Rik</i> | 0.617139707 | 0.027977218 | Mpst_Tg_upregulation |
| NM_170689    | <i>Ank3</i>          | 0.609650023 | 0.026530981 | Mpst_Tg_upregulation |
| NM_026127    | <i>4833420G17Rik</i> | 0.602788908 | 0.013299321 | Mpst_Tg_upregulation |
| NM_001170746 | <i>Magi2</i>         | 0.602236132 | 0.009939889 | Mpst_Tg_upregulation |
| NM_016697    | <i>Gpc3</i>          | 0.598502516 | 0.043052935 | Mpst_Tg_upregulation |
| NM_001164187 | <i>Nagk</i>          | 0.597140318 | 0.047692263 | Mpst_Tg_upregulation |
| NM_001161369 | <i>Ss18</i>          | 0.594622532 | 0.046949646 | Mpst_Tg_upregulation |
| NM_026149    | <i>Nudcd1</i>        | 0.590828682 | 0.047033924 | Mpst_Tg_upregulation |
| NM_011569    | <i>Tekt1</i>         | 0.589397282 | 0.042411668 | Mpst_Tg_upregulation |
| NM_133364    | <i>Prima1</i>        | 0.588730112 | 0.046133992 | Mpst_Tg_upregulation |
| NR_038158    | <i>5730405O15Rik</i> | 0.577359471 | 0.031266558 | Mpst_Tg_upregulation |
| NM_011365    | <i>Itsn2</i>         | 0.57415686  | 0.035813398 | Mpst_Tg_upregulation |
| NR_033133    | <i>Plscr3</i>        | 0.571780746 | 0.008671961 | Mpst_Tg_upregulation |
| NM_001165949 | <i>Pias3</i>         | 0.571628034 | 0.00048612  | Mpst_Tg_upregulation |
| NM_172144    | <i>Ppp2r3a</i>       | 0.562748484 | 0.011964685 | Mpst_Tg_upregulation |
| NM_008731    | <i>Npy2r</i>         | 0.540671436 | 0.00450017  | Mpst_Tg_upregulation |
| NM_001134391 | <i>Apobec1</i>       | 0.539171439 | 0.023546713 | Mpst_Tg_upregulation |
| NM_001286986 | <i>Dram2</i>         | 0.53576531  | 0.017213782 | Mpst_Tg_upregulation |
| NM_008708    | <i>Nmt2</i>          | 0.533151743 | 0.02932796  | Mpst_Tg_upregulation |
| NM_001122766 | <i>Sirt2</i>         | 0.529312207 | 0.026668396 | Mpst_Tg_upregulation |
| NM_207176    | <i>Tes</i>           | 0.527799197 | 0.034341014 | Mpst_Tg_upregulation |
| NM_175344    | <i>Ano6</i>          | 0.5275823   | 0.005519219 | Mpst_Tg_upregulation |
| NM_001289925 | <i>Egr3</i>          | 0.525373119 | 0.024530695 | Mpst_Tg_upregulation |
| NM_001079513 | <i>Zbtb33</i>        | 0.515188756 | 0.007942157 | Mpst_Tg_upregulation |
| NM_029612    | <i>Slamf9</i>        | 0.506034794 | 0.02218719  | Mpst_Tg_upregulation |
| NM_001099275 | <i>Tekt5</i>         | 0.504765785 | 0.019604402 | Mpst_Tg_upregulation |
| NM_007715    | <i>Clock</i>         | 0.503122525 | 0.042761337 | Mpst_Tg_upregulation |
| NM_028325    | <i>Zcchc12</i>       | 0.50179745  | 0.015279963 | Mpst_Tg_upregulation |
| NM_013696    | <i>Trhr</i>          | 0.497688851 | 0.001915495 | Mpst_Tg_upregulation |
| NM_183319    | <i>Xkrx</i>          | 0.492132939 | 0.00680671  | Mpst_Tg_upregulation |
| NM_001081052 | <i>Nhs</i>           | 0.488801783 | 0.04618749  | Mpst_Tg_upregulation |
| NM_026451    | <i>1600012H06Rik</i> | 0.48556293  | 0.024988686 | Mpst_Tg_upregulation |
| NM_001297596 | <i>Inpp4b</i>        | 0.484248784 | 0.004481094 | Mpst_Tg_upregulation |
| NM_001302834 | <i>Nsun7</i>         | 0.482670252 | 0.004860885 | Mpst_Tg_upregulation |
| NM_198410    | <i>Paqr6</i>         | 0.482554906 | 0.022809177 | Mpst_Tg_upregulation |
| NM_001286602 | <i>Clasp2</i>        | 0.480185641 | 0.013685467 | Mpst_Tg_upregulation |
| NM_001172121 | <i>Rbms3</i>         | 0.480166823 | 0.016324181 | Mpst_Tg_upregulation |
| NM_001033248 | <i>Gm266</i>         | 0.478554042 | 0.045725557 | Mpst_Tg_upregulation |
| NM_019691    | <i>Gria4</i>         | 0.473843976 | 0.034829424 | Mpst_Tg_upregulation |
| NM_001168623 | <i>Znrf1</i>         | 0.473258904 | 0.046748728 | Mpst_Tg_upregulation |
| NM_001285810 | <i>Dtna</i>          | 0.472573525 | 0.01789425  | Mpst_Tg_upregulation |
| NM_172205    | <i>Sbsn</i>          | 0.471802203 | 0.041171612 | Mpst_Tg_upregulation |
| NM_145135    | <i>Rnh1</i>          | 0.46996317  | 0.046752355 | Mpst_Tg_upregulation |
| NM_172930    | <i>Tmem255a</i>      | 0.4693485   | 0.001736401 | Mpst_Tg_upregulation |
| NM_001039676 | <i>Slc39a2</i>       | 0.467345974 | 0.021954212 | Mpst_Tg_upregulation |
| NM_016768    | <i>Pbx3</i>          | 0.466643248 | 0.033806044 | Mpst_Tg_upregulation |
| NM_008312    | <i>Htr2c</i>         | 0.460552204 | 0.007700518 | Mpst_Tg_upregulation |
| NM_001080795 | <i>G3bp2</i>         | 0.451875856 | 0.008513336 | Mpst_Tg_upregulation |
| NM_153140    | <i>Rab11fip3</i>     | 0.45080108  | 0.030855503 | Mpst_Tg_upregulation |
| NM_008097    | <i>Gcdh</i>          | 0.447663454 | 0.044745105 | Mpst_Tg_upregulation |
| NM_026167    | <i>Klhl13</i>        | 0.447052643 | 0.035227973 | Mpst_Tg_upregulation |
| NM_001291349 | <i>Anapc15</i>       | 0.445182349 | 0.018644605 | Mpst_Tg_upregulation |
| NM_001033442 | <i>Gm1604b</i>       | 0.444851551 | 0.03140467  | Mpst_Tg_upregulation |
| NM_001037717 | <i>Slc38a6</i>       | 0.443970798 | 0.004853968 | Mpst_Tg_upregulation |
| NM_001290419 | <i>Snapc4</i>        | 0.441130525 | 0.013335566 | Mpst_Tg_upregulation |
| NM_001159486 | <i>Mcf2l</i>         | 0.43896118  | 0.022797737 | Mpst_Tg_upregulation |
| NM_030700    | <i>Maged2</i>        | 0.438046836 | 0.030945514 | Mpst_Tg_upregulation |
| NM_153118    | <i>Fnbp1l</i>        | 0.431062651 | 0.001530338 | Mpst_Tg_upregulation |
| NM_010404    | <i>Hap1</i>          | 0.430690132 | 0.030804146 | Mpst_Tg_upregulation |
| NR_045399    | <i>Gm15328</i>       | 0.429963758 | 0.03912518  | Mpst_Tg_upregulation |

|              |                      |             |             |                      |
|--------------|----------------------|-------------|-------------|----------------------|
| NM_001290817 | <i>Sparc</i>         | 0.429894308 | 0.004531893 | Mpst_Tg_upregulation |
| NM_019397    | <i>Egfl6</i>         | 0.429295794 | 0.049350045 | Mpst_Tg_upregulation |
| NM_025771    | <i>Cntnap2</i>       | 0.427615311 | 0.019844676 | Mpst_Tg_upregulation |
| NM_146012    | <i>Ctdsp2</i>        | 0.424627443 | 0.012315511 | Mpst_Tg_upregulation |
| NM_177704    | <i>Syt15</i>         | 0.423627032 | 0.020970297 | Mpst_Tg_upregulation |
| NM_001102436 | <i>Acbd5</i>         | 0.420988179 | 0.005224411 | Mpst_Tg_upregulation |
| NR_028364    | <i>A1450353</i>      | 0.414677455 | 0.047299439 | Mpst_Tg_upregulation |
| NR_045297    | <i>Gm17644</i>       | 0.408993733 | 0.007513358 | Mpst_Tg_upregulation |
| NM_001040072 | <i>Nynrin</i>        | 0.404860363 | 0.026722494 | Mpst_Tg_upregulation |
| NM_001080127 | <i>Rnps1</i>         | 0.403597777 | 0.033298632 | Mpst_Tg_upregulation |
| NM_001039151 | <i>Cd44</i>          | 0.398299964 | 0.005828315 | Mpst_Tg_upregulation |
| NM_001081243 | <i>Filip1</i>        | 0.395837019 | 0.021167258 | Mpst_Tg_upregulation |
| NM_007696    | <i>Ovgp1</i>         | 0.389285465 | 0.032983544 | Mpst_Tg_upregulation |
| NM_001081153 | <i>Unc13c</i>        | 0.384959196 | 0.006651293 | Mpst_Tg_upregulation |
| NM_023386    | <i>Rtp4</i>          | 0.384502342 | 0.0055665   | Mpst_Tg_upregulation |
| NM_010225    | <i>Foxf2</i>         | 0.384416546 | 0.029575299 | Mpst_Tg_upregulation |
| NM_011978    | <i>Slc27a2</i>       | 0.382987193 | 0.037224058 | Mpst_Tg_upregulation |
| NR_037983    | <i>9330159M07Rik</i> | 0.381307451 | 0.035419267 | Mpst_Tg_upregulation |
| NM_016672    | <i>Ddc</i>           | 0.376424964 | 0.027695952 | Mpst_Tg_upregulation |
| NM_173016    | <i>Vat1l</i>         | 0.371443362 | 0.019361933 | Mpst_Tg_upregulation |
| NR_029443    | <i>4933407K13Rik</i> | 0.371070587 | 0.002391546 | Mpst_Tg_upregulation |
| NM_001077266 | <i>Hnrnpd</i>        | 0.369839549 | 0.046394462 | Mpst_Tg_upregulation |
| NM_026724    | <i>Rpl34</i>         | 0.367957646 | 0.03111007  | Mpst_Tg_upregulation |
| NM_001162934 | <i>Ctxn2</i>         | 0.367827645 | 0.005914053 | Mpst_Tg_upregulation |
| NR_102277    | <i>C030029H02Rik</i> | 0.366853512 | 0.02746743  | Mpst_Tg_upregulation |
| NM_001290288 | <i>Samd15</i>        | 0.366369042 | 0.021045574 | Mpst_Tg_upregulation |
| NM_026855    | <i>Arv1</i>          | 0.366018051 | 0.011568065 | Mpst_Tg_upregulation |
| NM_001081338 | <i>L3mbtl1</i>       | 0.365665764 | 0.007935998 | Mpst_Tg_upregulation |
| NM_030066    | <i>Armxc1</i>        | 0.364103505 | 0.048726045 | Mpst_Tg_upregulation |
| NM_007671    | <i>Cdkn2c</i>        | 0.361615616 | 0.026764243 | Mpst_Tg_upregulation |
| NM_001038610 | <i>Dach1</i>         | 0.359599869 | 0.027328071 | Mpst_Tg_upregulation |
| NM_001271898 | <i>Acox1</i>         | 0.359025701 | 0.004771865 | Mpst_Tg_upregulation |
| NM_170778    | <i>Dpyd</i>          | 0.354765883 | 0.008054454 | Mpst_Tg_upregulation |
| NM_019588    | <i>Plce1</i>         | 0.353379929 | 0.010214396 | Mpst_Tg_upregulation |
| NR_027388    | <i>1700096K18Rik</i> | 0.352159051 | 0.025137476 | Mpst_Tg_upregulation |
| NM_001291115 | <i>Rbm39</i>         | 0.351156484 | 0.02072752  | Mpst_Tg_upregulation |
| NM_008397    | <i>Irga6</i>         | 0.349958257 | 0.001513489 | Mpst_Tg_upregulation |
| NM_001193271 | <i>Meis1</i>         | 0.343503616 | 0.031739728 | Mpst_Tg_upregulation |
| NM_001115151 | <i>Uspl1</i>         | 0.343501852 | 0.041098927 | Mpst_Tg_upregulation |
| NM_133990    | <i>Il13ra1</i>       | 0.342273818 | 0.001299358 | Mpst_Tg_upregulation |
| NM_178227    | <i>Scn3b</i>         | 0.342139512 | 0.007430974 | Mpst_Tg_upregulation |
| NM_024474    | <i>Col26a1</i>       | 0.341828716 | 0.032385342 | Mpst_Tg_upregulation |
| NR_003633    | <i>Meg3</i>          | 0.341116811 | 0.021363229 | Mpst_Tg_upregulation |
| NM_080466    | <i>Kcm3</i>          | 0.338739717 | 0.017661979 | Mpst_Tg_upregulation |
| NM_001077709 | <i>Slc39a7</i>       | 0.337335398 | 0.002226705 | Mpst_Tg_upregulation |
| NM_001082962 | <i>Surpn</i>         | 0.332990198 | 0.005834529 | Mpst_Tg_upregulation |
| NM_172485    | <i>Thsd7b</i>        | 0.328180365 | 0.01658178  | Mpst_Tg_upregulation |
| NM_021416    | <i>Fam184b</i>       | 0.326912349 | 0.020300646 | Mpst_Tg_upregulation |
| NM_175215    | <i>Lysmd4</i>        | 0.322326647 | 0.030568263 | Mpst_Tg_upregulation |
| NM_009145    | <i>Nptn</i>          | 0.320034429 | 0.012031161 | Mpst_Tg_upregulation |
| NM_011307    | <i>Uimc1</i>         | 0.319144924 | 0.015869102 | Mpst_Tg_upregulation |
| NM_198037    | <i>Cachd1</i>        | 0.318933553 | 0.005171233 | Mpst_Tg_upregulation |
| NM_001081263 | <i>Slc44a5</i>       | 0.318119005 | 0.006021245 | Mpst_Tg_upregulation |
| NM_028398    | <i>Phykp1</i>        | 0.317904292 | 0.049287929 | Mpst_Tg_upregulation |
| NM_001042670 | <i>Mterf1b</i>       | 0.314823019 | 0.011991715 | Mpst_Tg_upregulation |
| NM_001289474 | <i>Erb2ip</i>        | 0.314333165 | 0.012626628 | Mpst_Tg_upregulation |
| NM_145492    | <i>Zfp521</i>        | 0.312216973 | 0.022091046 | Mpst_Tg_upregulation |
| NM_001291282 | <i>Tm6sf1</i>        | 0.311499745 | 0.026645606 | Mpst_Tg_upregulation |
| NM_008553    | <i>Ascl1</i>         | 0.309978235 | 0.039723829 | Mpst_Tg_upregulation |
| NM_001009948 | <i>Nrsn2</i>         | 0.308024188 | 0.02940404  | Mpst_Tg_upregulation |
| NM_009573    | <i>Zic1</i>          | 0.306138673 | 0.038540147 | Mpst_Tg_upregulation |
| NM_013534    | <i>P3h3</i>          | 0.305262945 | 0.022987868 | Mpst_Tg_upregulation |

|              |                      |             |             |                      |
|--------------|----------------------|-------------|-------------|----------------------|
| NM_172661    | <i>Prrc2b</i>        | 0.304231071 | 0.015850547 | Mpst_Tg_upregulation |
| NM_001256142 | <i>Fsbp</i>          | 0.302856984 | 0.026065384 | Mpst_Tg_upregulation |
| NM_023543    | <i>Chn2</i>          | 0.299838432 | 0.021891263 | Mpst_Tg_upregulation |
| NM_001290465 | <i>Adams13</i>       | 0.299166498 | 0.045381832 | Mpst_Tg_upregulation |
| NM_010127    | <i>Pou6f1</i>        | 0.298931119 | 0.001860827 | Mpst_Tg_upregulation |
| NM_016701    | <i>Nes</i>           | 0.297709199 | 0.007744428 | Mpst_Tg_upregulation |
| NM_175423    | <i>Orail</i>         | 0.297009157 | 0.020599081 | Mpst_Tg_upregulation |
| NM_175308    | <i>Mob3c</i>         | 0.296765779 | 0.017137149 | Mpst_Tg_upregulation |
| NM_028966    | <i>Samd4</i>         | 0.29463294  | 0.049175682 | Mpst_Tg_upregulation |
| NR_033324    | <i>BC065397</i>      | 0.292141479 | 0.010963586 | Mpst_Tg_upregulation |
| NM_001293668 | <i>Atp11a</i>        | 0.292062775 | 0.04708436  | Mpst_Tg_upregulation |
| NM_019923    | <i>Itr2</i>          | 0.291318538 | 0.049921415 | Mpst_Tg_upregulation |
| NM_011797    | <i>Carl4</i>         | 0.290988641 | 0.041552319 | Mpst_Tg_upregulation |
| NM_053269    | <i>Rad51c</i>        | 0.288424617 | 0.022229418 | Mpst_Tg_upregulation |
| NM_001271860 | <i>Add2</i>          | 0.288133393 | 0.032111989 | Mpst_Tg_upregulation |
| NM_009384    | <i>Tiam1</i>         | 0.287445918 | 0.015048547 | Mpst_Tg_upregulation |
| NM_175650    | <i>Atp13a5</i>       | 0.287320187 | 0.004243898 | Mpst_Tg_upregulation |
| NM_153197    | <i>Clec4a3</i>       | 0.283501064 | 0.04036594  | Mpst_Tg_upregulation |
| NM_007652    | <i>Cd59a</i>         | 0.28096166  | 0.005597167 | Mpst_Tg_upregulation |
| NM_146257    | <i>Slc29a4</i>       | 0.280358995 | 0.037908494 | Mpst_Tg_upregulation |
| NM_198937    | <i>Hn11</i>          | 0.28016672  | 0.042934354 | Mpst_Tg_upregulation |
| NM_001001333 | <i>Hexdc</i>         | 0.279663769 | 0.042879343 | Mpst_Tg_upregulation |
| NM_001278534 | <i>Rgag4</i>         | 0.276327296 | 0.015180811 | Mpst_Tg_upregulation |
| NM_147218    | <i>Abca6</i>         | 0.27447077  | 0.026303756 | Mpst_Tg_upregulation |
| NM_175003    | <i>Arhgap44</i>      | 0.274184978 | 0.036547061 | Mpst_Tg_upregulation |
| NM_001081005 | <i>1500012F01Rik</i> | 0.273179703 | 0.019679059 | Mpst_Tg_upregulation |
| NM_198090    | <i>Hnrnpa3</i>       | 0.272900667 | 0.044660248 | Mpst_Tg_upregulation |
| NM_178598    | <i>Tagln2</i>        | 0.270240147 | 0.021111695 | Mpst_Tg_upregulation |
| NR_037906    | <i>Luc7l</i>         | 0.269463392 | 0.001533966 | Mpst_Tg_upregulation |
| NR_015505    | <i>Firre</i>         | 0.268935029 | 0.006941007 | Mpst_Tg_upregulation |
| NM_172126    | <i>Adam1a</i>        | 0.268838756 | 0.041163853 | Mpst_Tg_upregulation |
| NM_175162    | <i>Stox2</i>         | 0.268442547 | 0.002804948 | Mpst_Tg_upregulation |
| NM_020259    | <i>Hhip</i>          | 0.26679888  | 0.018524638 | Mpst_Tg_upregulation |
| NM_009285    | <i>Stc1</i>          | 0.266247302 | 0.041656694 | Mpst_Tg_upregulation |
| NM_053196    | <i>Sfxn2</i>         | 0.266240773 | 0.036358397 | Mpst_Tg_upregulation |
| NR_015566    | <i>A330023F24Rik</i> | 0.265238054 | 0.013008732 | Mpst_Tg_upregulation |
| NM_019696    | <i>Cpxm1</i>         | 0.263094828 | 0.020471158 | Mpst_Tg_upregulation |
| NM_001113325 | <i>Grial</i>         | 0.262664736 | 0.023690586 | Mpst_Tg_upregulation |
| NR_033621    | <i>Olfir856-ps1</i>  | 0.26233822  | 0.034082681 | Mpst_Tg_upregulation |
| NM_028894    | <i>Lonf3</i>         | 0.259114099 | 0.007725141 | Mpst_Tg_upregulation |
| NM_199475    | <i>Fam63a</i>        | 0.258446965 | 0.028159184 | Mpst_Tg_upregulation |
| NM_008239    | <i>Foxq1</i>         | 0.254527876 | 0.048535186 | Mpst_Tg_upregulation |
| NM_001009947 | <i>Dock11</i>        | 0.254407307 | 0.025406862 | Mpst_Tg_upregulation |
| NM_001082484 | <i>Snx27</i>         | 0.254379755 | 0.003765828 | Mpst_Tg_upregulation |
| NM_175692    | <i>Snhg11</i>        | 0.254057637 | 0.025268357 | Mpst_Tg_upregulation |
| NM_199079    | <i>Ddx17</i>         | 0.253595361 | 0.017100947 | Mpst_Tg_upregulation |
| NM_001081329 | <i>Zkscan2</i>       | 0.252948579 | 0.026696879 | Mpst_Tg_upregulation |
| NM_153545    | <i>Lrrc45</i>        | 0.252790369 | 0.027361125 | Mpst_Tg_upregulation |
| NM_001110506 | <i>Efcab12</i>       | 0.25193168  | 0.031646949 | Mpst_Tg_upregulation |
| NM_001033380 | <i>Itpr12</i>        | 0.251928288 | 0.035876881 | Mpst_Tg_upregulation |
| NM_153596    | <i>Tmem17</i>        | 0.251750875 | 0.020854242 | Mpst_Tg_upregulation |
| NM_018851    | <i>Samhd1</i>        | 0.25078153  | 0.025860133 | Mpst_Tg_upregulation |
| NM_178673    | <i>Fstl5</i>         | 0.248694028 | 0.042200659 | Mpst_Tg_upregulation |
| NR_028380    | <i>Ftx</i>           | 0.248568989 | 0.013630226 | Mpst_Tg_upregulation |
| NM_021720    | <i>Donson</i>        | 0.248492135 | 0.016360472 | Mpst_Tg_upregulation |
| NM_181413    | <i>Anks1</i>         | 0.247265519 | 0.019977941 | Mpst_Tg_upregulation |
| NM_019832    | <i>Gkap1</i>         | 0.247199293 | 0.043673219 | Mpst_Tg_upregulation |
| NR_036616    | <i>Srsf9</i>         | 0.246415714 | 0.030642423 | Mpst_Tg_upregulation |
| NR_040398    | <i>4930570G19Rik</i> | 0.246243039 | 0.029466016 | Mpst_Tg_upregulation |
| NR_026990    | <i>Gm5577</i>        | 0.244560379 | 0.045271585 | Mpst_Tg_upregulation |
| NM_011157    | <i>Srgn</i>          | 0.242257257 | 0.047637973 | Mpst_Tg_upregulation |
| NR_033221    | <i>BC031361</i>      | 0.241798458 | 0.037280206 | Mpst_Tg_upregulation |

|              |                      |             |             |                      |
|--------------|----------------------|-------------|-------------|----------------------|
| NR_027651    | <i>Meg3</i>          | 0.24081407  | 0.023571381 | Mpst_Tg_upregulation |
| NM_172471    | <i>Iih5</i>          | 0.239389491 | 0.034425598 | Mpst_Tg_upregulation |
| NM_001290379 | <i>Ap1s2</i>         | 0.239173206 | 0.049647197 | Mpst_Tg_upregulation |
| NR_033121    | <i>Gm10409</i>       | 0.236348427 | 0.041086173 | Mpst_Tg_upregulation |
| NM_001163728 | <i>4930563E22Rik</i> | 0.235591327 | 0.043303368 | Mpst_Tg_upregulation |
| NR_033121    | <i>Gm10409</i>       | 0.235168465 | 0.036091452 | Mpst_Tg_upregulation |
| NM_016967    | <i>Olig2</i>         | 0.234074395 | 0.012623005 | Mpst_Tg_upregulation |
| NM_023047    | <i>Dpysl5</i>        | 0.233817484 | 0.007554349 | Mpst_Tg_upregulation |
| NM_001035510 | <i>Zcchc18</i>       | 0.233380035 | 0.012281283 | Mpst_Tg_upregulation |
| NM_178066    | <i>Tmem198b</i>      | 0.231622008 | 0.03348749  | Mpst_Tg_upregulation |
| NM_146057    | <i>Dap</i>           | 0.230620517 | 0.028683312 | Mpst_Tg_upregulation |
| NM_001276279 | <i>Cyld</i>          | 0.230300283 | 0.034077348 | Mpst_Tg_upregulation |
| NM_012018    | <i>Cntrl</i>         | 0.228598003 | 0.040854783 | Mpst_Tg_upregulation |
| NM_022980    | <i>Rcan3</i>         | 0.228282613 | 0.028006206 | Mpst_Tg_upregulation |
| NM_017401    | <i>Polm</i>          | 0.228275507 | 0.03176932  | Mpst_Tg_upregulation |
| NM_001081395 | <i>Amotl1</i>        | 0.227780702 | 0.028591008 | Mpst_Tg_upregulation |
| NM_178774    | <i>Prr18</i>         | 0.227322198 | 0.001516113 | Mpst_Tg_upregulation |
| NM_001110271 | <i>Abhd14a</i>       | 0.226954919 | 0.029532757 | Mpst_Tg_upregulation |
| NM_007616    | <i>Cav1</i>          | 0.226946979 | 0.010960981 | Mpst_Tg_upregulation |
| NM_177074    | <i>Slc38a11</i>      | 0.224407612 | 0.045136805 | Mpst_Tg_upregulation |
| NM_001025381 | <i>Gpr17</i>         | 0.224268579 | 0.013837185 | Mpst_Tg_upregulation |
| NM_027890    | <i>Susd2</i>         | 0.223892885 | 0.014106489 | Mpst_Tg_upregulation |
| NM_007801    | <i>Ctsh</i>          | 0.222953081 | 0.015041648 | Mpst_Tg_upregulation |
| NM_009621    | <i>Adamts1</i>       | 0.222363422 | 0.049717089 | Mpst_Tg_upregulation |
| NM_177185    | <i>Ubn2</i>          | 0.222027461 | 0.012459157 | Mpst_Tg_upregulation |
| NM_133188    | <i>Dazap1</i>        | 0.221913651 | 0.020858163 | Mpst_Tg_upregulation |
| NM_010252    | <i>Gabrg1</i>        | 0.220775591 | 0.034037743 | Mpst_Tg_upregulation |
| NM_001159301 | <i>Lgals9</i>        | 0.220757662 | 0.013056604 | Mpst_Tg_upregulation |
| NM_172530    | <i>She</i>           | 0.220149186 | 0.049408815 | Mpst_Tg_upregulation |
| NM_019427    | <i>Epb4.114b</i>     | 0.219613215 | 0.00986834  | Mpst_Tg_upregulation |
| NM_001199352 | <i>Pnck</i>          | 0.219407557 | 0.011489599 | Mpst_Tg_upregulation |
| NM_001081386 | <i>Cdh19</i>         | 0.218344137 | 0.033700527 | Mpst_Tg_upregulation |
| NR_028429    | <i>Thap6</i>         | 0.218334601 | 0.005491868 | Mpst_Tg_upregulation |
| NM_010656    | <i>Sspn</i>          | 0.218185116 | 0.034174881 | Mpst_Tg_upregulation |
| NM_177135    | <i>D830030K20Rik</i> | 0.216735244 | 0.048805109 | Mpst_Tg_upregulation |
| NM_008832    | <i>Phkal</i>         | 0.216715357 | 0.020434467 | Mpst_Tg_upregulation |
| NM_001293559 | <i>Cox4i1</i>        | 0.215927422 | 0.032669087 | Mpst_Tg_upregulation |
| NM_207655    | <i>Egfr</i>          | 0.215891832 | 0.012021199 | Mpst_Tg_upregulation |
| NM_178281    | <i>Trim39</i>        | 0.215690168 | 0.024888891 | Mpst_Tg_upregulation |
| NM_177710    | <i>Ssh2</i>          | 0.213771293 | 0.004091161 | Mpst_Tg_upregulation |
| NM_153507    | <i>Cpne2</i>         | 0.21316154  | 0.039859903 | Mpst_Tg_upregulation |
| NM_001001806 | <i>Zfp3612</i>       | 0.212622511 | 0.012270435 | Mpst_Tg_upregulation |
| NM_031184    | <i>Glis2</i>         | 0.211965421 | 0.009563405 | Mpst_Tg_upregulation |
| NM_173012    | <i>Letm2</i>         | 0.211873602 | 0.046272871 | Mpst_Tg_upregulation |
| NM_146065    | <i>Atf7</i>          | 0.210769962 | 0.045760083 | Mpst_Tg_upregulation |
| NM_008830    | <i>Abcb4</i>         | 0.210455752 | 0.035839308 | Mpst_Tg_upregulation |
| NM_008026    | <i>Fli1</i>          | 0.208691538 | 0.011671752 | Mpst_Tg_upregulation |
| NM_001014974 | <i>Till4</i>         | 0.207961467 | 0.00762626  | Mpst_Tg_upregulation |
| NM_001159553 | <i>H13</i>           | 0.206584923 | 0.020550744 | Mpst_Tg_upregulation |
| NM_019422    | <i>Elov11</i>        | 0.206261343 | 0.044071618 | Mpst_Tg_upregulation |
| NM_021390    | <i>Sall1</i>         | 0.204937717 | 0.028736574 | Mpst_Tg_upregulation |
| NM_172833    | <i>Malt1</i>         | 0.204288417 | 0.02270605  | Mpst_Tg_upregulation |
| NM_001099785 | <i>D3Erd751e</i>     | 0.203580084 | 0.041894324 | Mpst_Tg_upregulation |
| NM_029098    | <i>Lmbr11</i>        | 0.201576844 | 0.005251497 | Mpst_Tg_upregulation |
| NR_027351    | <i>Trpt1</i>         | 0.201042097 | 0.038798922 | Mpst_Tg_upregulation |
| NM_177364    | <i>Sh3pxd2b</i>      | 0.200973008 | 0.041252064 | Mpst_Tg_upregulation |
| NM_028749    | <i>Npl</i>           | 0.200658959 | 0.011736048 | Mpst_Tg_upregulation |
| NM_008156    | <i>Gpld1</i>         | 0.200600124 | 0.00592344  | Mpst_Tg_upregulation |
| NM_007564    | <i>Zfp3611</i>       | 0.20047138  | 0.036034498 | Mpst_Tg_upregulation |
| NM_178704    | <i>Dpy19l3</i>       | 0.199379044 | 0.047966241 | Mpst_Tg_upregulation |
| NM_001081049 | <i>Kmt2a</i>         | 0.199159476 | 0.017357553 | Mpst_Tg_upregulation |
| NM_019802    | <i>Ggcx</i>          | 0.199102128 | 0.017138681 | Mpst_Tg_upregulation |

|              |                      |             |             |                      |
|--------------|----------------------|-------------|-------------|----------------------|
| NM_176837    | <i>Arhgap18</i>      | 0.195331124 | 0.009035804 | Mpst_Tg_upregulation |
| NM_007831    | <i>Dcc</i>           | 0.193943566 | 0.026389056 | Mpst_Tg_upregulation |
| NM_134257    | <i>Rgs3</i>          | 0.19389993  | 0.008234924 | Mpst_Tg_upregulation |
| NM_001198861 | <i>Ctbp1</i>         | 0.193605404 | 0.043907061 | Mpst_Tg_upregulation |
| NM_013864    | <i>Ndrp2</i>         | 0.193103694 | 0.002070217 | Mpst_Tg_upregulation |
| NM_194262    | <i>Arid4b</i>        | 0.192922163 | 0.015243592 | Mpst_Tg_upregulation |
| NM_001164805 | <i>Thsd7a</i>        | 0.192821375 | 0.027573324 | Mpst_Tg_upregulation |
| NM_008043    | <i>Frat1</i>         | 0.192393224 | 0.015322583 | Mpst_Tg_upregulation |
| NM_011976    | <i>Sema4g</i>        | 0.191687842 | 0.02031498  | Mpst_Tg_upregulation |
| NM_175229    | <i>Srrm2</i>         | 0.191581589 | 0.023325164 | Mpst_Tg_upregulation |
| NM_026493    | <i>Cspp1</i>         | 0.191430559 | 0.044423665 | Mpst_Tg_upregulation |
| NM_138590    | <i>Zcchc7</i>        | 0.191062569 | 0.018718043 | Mpst_Tg_upregulation |
| NM_001163184 | <i>Plekhh1</i>       | 0.190560618 | 0.046296404 | Mpst_Tg_upregulation |
| NM_009987    | <i>Cx3cr1</i>        | 0.190032669 | 0.003507687 | Mpst_Tg_upregulation |
| NM_019653    | <i>Wsb1</i>          | 0.189876264 | 0.002356652 | Mpst_Tg_upregulation |
| NM_001015681 | <i>E130308A19Rik</i> | 0.189375761 | 0.028162763 | Mpst_Tg_upregulation |
| NM_175500    | <i>Gpc5</i>          | 0.18880903  | 0.00069076  | Mpst_Tg_upregulation |
| NM_013822    | <i>Jag1</i>          | 0.188512892 | 0.042435033 | Mpst_Tg_upregulation |
| NR_015483    | <i>2610203C20Rik</i> | 0.188165422 | 0.013630284 | Mpst_Tg_upregulation |
| NM_001164659 | <i>Trank1</i>        | 0.187679336 | 0.04144003  | Mpst_Tg_upregulation |
| NM_027911    | <i>Raver1</i>        | 0.187624841 | 0.024313897 | Mpst_Tg_upregulation |
| NM_026599    | <i>Cgn1</i>          | 0.187538792 | 0.046203693 | Mpst_Tg_upregulation |
| NM_001042488 | <i>Dlgap4</i>        | 0.186683504 | 0.033792037 | Mpst_Tg_upregulation |
| NM_026769    | <i>Caly</i>          | 0.186581954 | 0.049652988 | Mpst_Tg_upregulation |
| NM_011159    | <i>Prkdc</i>         | 0.186076135 | 0.016202385 | Mpst_Tg_upregulation |
| NM_080437    | <i>Celsr3</i>        | 0.18451127  | 0.02704741  | Mpst_Tg_upregulation |
| NM_001044740 | <i>Slc7a2</i>        | 0.18348095  | 0.036571032 | Mpst_Tg_upregulation |
| NM_011808    | <i>Ets1</i>          | 0.183342952 | 0.012516299 | Mpst_Tg_upregulation |
| NM_029836    | <i>Tspyl2</i>        | 0.182573399 | 0.013695036 | Mpst_Tg_upregulation |
| NM_177572    | <i>Rimk1a</i>        | 0.182443449 | 0.041991422 | Mpst_Tg_upregulation |
| NM_029385    | <i>Nudt16</i>        | 0.181806126 | 0.005539525 | Mpst_Tg_upregulation |
| NM_130879    | <i>Usp48</i>         | 0.181206503 | 0.010491611 | Mpst_Tg_upregulation |
| NM_013780    | <i>Npas3</i>         | 0.181011692 | 0.041824917 | Mpst_Tg_upregulation |
| NM_172779    | <i>Ddx26b</i>        | 0.181009955 | 0.029410504 | Mpst_Tg_upregulation |
| NR_033388    | <i>Gm3002</i>        | 0.180241981 | 0.03394836  | Mpst_Tg_upregulation |
| NM_177047    | <i>Auts2</i>         | 0.17948183  | 0.039242597 | Mpst_Tg_upregulation |
| NM_145940    | <i>Wipi1</i>         | 0.179310781 | 0.025331836 | Mpst_Tg_upregulation |
| NM_009847    | <i>Cd2ap</i>         | 0.178634173 | 0.003807389 | Mpst_Tg_upregulation |
| NM_033602    | <i>Peli2</i>         | 0.17818127  | 0.005004259 | Mpst_Tg_upregulation |
| NM_028234    | <i>Rbm33</i>         | 0.17782931  | 0.016707989 | Mpst_Tg_upregulation |
| NM_134115    | <i>Stk38</i>         | 0.177386277 | 0.000221556 | Mpst_Tg_upregulation |
| NM_153145    | <i>Abca8a</i>        | 0.177187178 | 0.025661758 | Mpst_Tg_upregulation |
| NM_001252530 | <i>Slco2b1</i>       | 0.176754154 | 0.005185519 | Mpst_Tg_upregulation |
| NM_145925    | <i>Pttglip</i>       | 0.176668712 | 0.002714629 | Mpst_Tg_upregulation |
| NM_001097644 | <i>Ccnyl1</i>        | 0.176436765 | 0.015466849 | Mpst_Tg_upregulation |
| NM_001011780 | <i>Olfr287</i>       | 0.175996741 | 0.035652358 | Mpst_Tg_upregulation |
| NM_001042707 | <i>Ilf3</i>          | 0.175481125 | 0.021745905 | Mpst_Tg_upregulation |
| NM_138749    | <i>Plxnb2</i>        | 0.175307891 | 0.026380543 | Mpst_Tg_upregulation |
| NM_001244916 | <i>Sall2</i>         | 0.175075626 | 0.031518075 | Mpst_Tg_upregulation |
| NM_019922    | <i>Crtap</i>         | 0.174631932 | 0.020825803 | Mpst_Tg_upregulation |
| NM_175367    | <i>Ston2</i>         | 0.173139409 | 0.010498601 | Mpst_Tg_upregulation |
| NM_023908    | <i>Slco3a1</i>       | 0.172576747 | 0.046211437 | Mpst_Tg_upregulation |
| NM_009071    | <i>Rock1</i>         | 0.172517052 | 0.008004246 | Mpst_Tg_upregulation |
| NM_016721    | <i>Iqgap1</i>        | 0.172069659 | 0.017224768 | Mpst_Tg_upregulation |
| NM_001033286 | <i>Slc30a10</i>      | 0.171249739 | 0.036645368 | Mpst_Tg_upregulation |
| NM_023372    | <i>Rpl38</i>         | 0.171085334 | 0.034463524 | Mpst_Tg_upregulation |
| NM_018732    | <i>Scn3a</i>         | 0.17019378  | 0.022275243 | Mpst_Tg_upregulation |
| NR_033146    | <i>Gm17821</i>       | 0.17014145  | 0.021189558 | Mpst_Tg_upregulation |
| NM_175155    | <i>Sash1</i>         | 0.169799119 | 0.012845396 | Mpst_Tg_upregulation |
| NM_001035123 | <i>Setd6</i>         | 0.169383058 | 0.035418082 | Mpst_Tg_upregulation |
| NM_134003    | <i>Zc3h10</i>        | 0.168564368 | 0.047395604 | Mpst_Tg_upregulation |
| NM_177715    | <i>Kctd12</i>        | 0.168470888 | 0.007746605 | Mpst_Tg_upregulation |

|              |                      |             |             |                      |
|--------------|----------------------|-------------|-------------|----------------------|
| NM_030147    | <i>Brd8</i>          | 0.167491125 | 0.014942244 | Mpst_Tg_upregulation |
| NM_001013770 | <i>Lipo1</i>         | 0.165690629 | 0.044039974 | Mpst_Tg_upregulation |
| NM_009655    | <i>Alcam</i>         | 0.164999456 | 0.0243589   | Mpst_Tg_upregulation |
| NM_001081391 | <i>Csmd3</i>         | 0.164488134 | 0.015687279 | Mpst_Tg_upregulation |
| NM_010821    | <i>Mpeg1</i>         | 0.163539966 | 0.024272019 | Mpst_Tg_upregulation |
| NM_010918    | <i>Nktr</i>          | 0.163311292 | 0.025610624 | Mpst_Tg_upregulation |
| NM_013659    | <i>Sema4b</i>        | 0.162491973 | 0.042962981 | Mpst_Tg_upregulation |
| NM_026418    | <i>Rgs10</i>         | 0.162201256 | 0.029358903 | Mpst_Tg_upregulation |
| NM_016785    | <i>Tpm1</i>          | 0.16095777  | 0.039253771 | Mpst_Tg_upregulation |
| NM_009980    | <i>Ctbp2</i>         | 0.160957574 | 0.028326775 | Mpst_Tg_upregulation |
| NM_145537    | <i>Edem2</i>         | 0.160721566 | 0.014392219 | Mpst_Tg_upregulation |
| NM_008876    | <i>Pld2</i>          | 0.160679528 | 0.040676071 | Mpst_Tg_upregulation |
| NM_146114    | <i>Dclre1c</i>       | 0.160206075 | 0.021199744 | Mpst_Tg_upregulation |
| NM_028341    | <i>Tic39c</i>        | 0.160153228 | 0.036845883 | Mpst_Tg_upregulation |
| NM_173788    | <i>Npr2</i>          | 0.16003717  | 0.035904943 | Mpst_Tg_upregulation |
| NM_009615    | <i>Adam17</i>        | 0.159849418 | 0.049439212 | Mpst_Tg_upregulation |
| NM_029781    | <i>Rab36</i>         | 0.159824223 | 0.041271675 | Mpst_Tg_upregulation |
| NM_011261    | <i>Reln</i>          | 0.158710069 | 0.000572378 | Mpst_Tg_upregulation |
| NM_001111268 | <i>Grik2</i>         | 0.157815489 | 0.013338126 | Mpst_Tg_upregulation |
| NM_015828    | <i>Gne</i>           | 0.157445513 | 0.026934243 | Mpst_Tg_upregulation |
| NM_026046    | <i>Zfp329</i>        | 0.157367728 | 0.007751743 | Mpst_Tg_upregulation |
| NR_028101    | <i>Gm12191</i>       | 0.156947562 | 0.047369946 | Mpst_Tg_upregulation |
| NM_016799    | <i>Srrm1</i>         | 0.155361372 | 0.013589006 | Mpst_Tg_upregulation |
| NM_009230    | <i>Soat1</i>         | 0.155349974 | 0.002617993 | Mpst_Tg_upregulation |
| NM_026036    | <i>Cntm6</i>         | 0.155261082 | 0.024169617 | Mpst_Tg_upregulation |
| NM_025669    | <i>Pn1sr</i>         | 0.153254145 | 0.023497513 | Mpst_Tg_upregulation |
| NM_001159516 | <i>Qk</i>            | 0.153093947 | 0.015774522 | Mpst_Tg_upregulation |
| NM_026963    | <i>Lzic</i>          | 0.151015617 | 0.048696748 | Mpst_Tg_upregulation |
| NM_009832    | <i>Ccnk</i>          | 0.150560798 | 0.014336132 | Mpst_Tg_upregulation |
| NM_145955    | <i>Mcmbp</i>         | 0.147923587 | 0.022051144 | Mpst_Tg_upregulation |
| NM_026825    | <i>Lrrc16a</i>       | 0.14785945  | 0.01458372  | Mpst_Tg_upregulation |
| NM_027189    | <i>Gemin7</i>        | 0.146544315 | 0.046101907 | Mpst_Tg_upregulation |
| NM_001162906 | <i>2410089E03Rik</i> | 0.146431432 | 0.006216197 | Mpst_Tg_upregulation |
| NM_001033472 | <i>A830080D01Rik</i> | 0.146217357 | 0.049104418 | Mpst_Tg_upregulation |
| NM_028099    | <i>Dusp11</i>        | 0.145937029 | 0.022292086 | Mpst_Tg_upregulation |
| NM_207636    | <i>Fndc3a</i>        | 0.14588978  | 0.003093978 | Mpst_Tg_upregulation |
| NM_011594    | <i>Timp2</i>         | 0.145845082 | 0.02480913  | Mpst_Tg_upregulation |
| NM_172907    | <i>Olfml1</i>        | 0.145035243 | 0.037249563 | Mpst_Tg_upregulation |
| NM_026069    | <i>Rpl37</i>         | 0.144095234 | 0.0494944   | Mpst_Tg_upregulation |
| NM_028493    | <i>Rhobtb3</i>       | 0.143869734 | 0.000881148 | Mpst_Tg_upregulation |
| NM_001166552 | <i>Zbed6</i>         | 0.143441724 | 0.036054423 | Mpst_Tg_upregulation |
| NM_001024928 | <i>Zfp667</i>        | 0.142551418 | 0.0377079   | Mpst_Tg_upregulation |
| NM_145825    | <i>Cem4</i>          | 0.141778497 | 0.025892985 | Mpst_Tg_upregulation |
| NM_028808    | <i>P2ry13</i>        | 0.141749674 | 0.027645189 | Mpst_Tg_upregulation |
| NM_023644    | <i>Mccc1</i>         | 0.141731645 | 0.003175713 | Mpst_Tg_upregulation |
| NM_001110253 | <i>Fyco1</i>         | 0.139981037 | 0.046218957 | Mpst_Tg_upregulation |
| NM_011247    | <i>Rbbp6</i>         | 0.139971296 | 0.003179695 | Mpst_Tg_upregulation |
| NM_028708    | <i>Jakmip3</i>       | 0.139706283 | 0.015821464 | Mpst_Tg_upregulation |
| NM_001039546 | <i>Myo6</i>          | 0.138997494 | 0.015267282 | Mpst_Tg_upregulation |
| NM_025845    | <i>Prpf38b</i>       | 0.138248433 | 0.008818063 | Mpst_Tg_upregulation |
| NM_013595    | <i>Mbd3</i>          | 0.137912753 | 0.018788883 | Mpst_Tg_upregulation |
| NM_028932    | <i>Eaf1</i>          | 0.137596877 | 0.044372611 | Mpst_Tg_upregulation |
| NM_009163    | <i>Sgpl1</i>         | 0.137409086 | 0.041996253 | Mpst_Tg_upregulation |
| NM_133710    | <i>Ctdspl</i>        | 0.13715213  | 0.00243809  | Mpst_Tg_upregulation |
| NM_008133    | <i>Glud1</i>         | 0.13687156  | 0.013569923 | Mpst_Tg_upregulation |
| NM_133208    | <i>Zfp287</i>        | 0.136717267 | 0.031731829 | Mpst_Tg_upregulation |
| NM_021315    | <i>Noc3l</i>         | 0.13621062  | 0.010128196 | Mpst_Tg_upregulation |
| NM_001005385 | <i>Gprasp1</i>       | 0.135821328 | 0.004424213 | Mpst_Tg_upregulation |
| NM_198100    | <i>Tbkbp1</i>        | 0.135609616 | 0.019305994 | Mpst_Tg_upregulation |
| NM_153319    | <i>Amot</i>          | 0.133103636 | 0.03335832  | Mpst_Tg_upregulation |
| NM_172851    | <i>Cntnap5b</i>      | 0.132522126 | 0.033742894 | Mpst_Tg_upregulation |
| NM_130796    | <i>Snx18</i>         | 0.132022302 | 0.039880828 | Mpst_Tg_upregulation |



|              |                      |             |             |                      |
|--------------|----------------------|-------------|-------------|----------------------|
| NM_013725    | <i>Rps11</i>         | 0.131966441 | 1.93218E-05 | Mpst_Tg_upregulation |
| NM_011602    | <i>Tln1</i>          | 0.131708563 | 0.041506907 | Mpst_Tg_upregulation |
| NM_025943    | <i>Dzip1</i>         | 0.131359023 | 0.011892704 | Mpst_Tg_upregulation |
| NR_030694    | <i>1110002L01Rik</i> | 0.130443637 | 0.011546089 | Mpst_Tg_upregulation |
| NM_008745    | <i>Ntrk2</i>         | 0.13043048  | 0.008236113 | Mpst_Tg_upregulation |
| NM_173740    | <i>Maoa</i>          | 0.129477379 | 0.047361082 | Mpst_Tg_upregulation |
| NM_018786    | <i>Prpf40b</i>       | 0.129260047 | 0.029943747 | Mpst_Tg_upregulation |
| NM_001278256 | <i>Prnp</i>          | 0.128485964 | 0.029240668 | Mpst_Tg_upregulation |
| NM_080708    | <i>Bmp2k</i>         | 0.127937876 | 0.039487246 | Mpst_Tg_upregulation |
| NM_001289771 | <i>Exoc1</i>         | 0.127272891 | 0.048387781 | Mpst_Tg_upregulation |
| NM_001276704 | <i>Nxf1</i>          | 0.127044228 | 0.013208744 | Mpst_Tg_upregulation |
| NM_172671    | <i>Lgr4</i>          | 0.12389002  | 0.047616638 | Mpst_Tg_upregulation |
| NM_009538    | <i>Plagl1</i>        | 0.123846119 | 0.017851313 | Mpst_Tg_upregulation |
| NM_001163610 | <i>Nhs12</i>         | 0.121512092 | 0.048248238 | Mpst_Tg_upregulation |
| NM_172757    | <i>Heatr3</i>        | 0.120710308 | 0.038292655 | Mpst_Tg_upregulation |
| NM_177093    | <i>Lrrc58</i>        | 0.116300286 | 0.016936322 | Mpst_Tg_upregulation |
| NM_011546    | <i>Zeb1</i>          | 0.11415181  | 0.048896434 | Mpst_Tg_upregulation |
| NM_020608    | <i>Cramp11</i>       | 0.113967653 | 0.014675314 | Mpst_Tg_upregulation |
| NM_172592    | <i>Srek1</i>         | 0.113861266 | 0.030264954 | Mpst_Tg_upregulation |
| NM_029432    | <i>4930402H24Rik</i> | 0.113802423 | 0.00544976  | Mpst_Tg_upregulation |
| NM_010008    | <i>Cyp2j6</i>        | 0.112398207 | 0.028646235 | Mpst_Tg_upregulation |
| NM_011952    | <i>Mapk3</i>         | 0.111093219 | 0.022246408 | Mpst_Tg_upregulation |
| NM_144925    | <i>Tnrc6a</i>        | 0.110894481 | 0.018615139 | Mpst_Tg_upregulation |
| NM_184088    | <i>Dennd4c</i>       | 0.110701863 | 0.000963883 | Mpst_Tg_upregulation |
| NM_001024952 | <i>Rc3h1</i>         | 0.110404908 | 0.016921983 | Mpst_Tg_upregulation |
| NM_001191004 | <i>Lsm6</i>          | 0.109862971 | 0.007288084 | Mpst_Tg_upregulation |
| NM_001081383 | <i>Kmt2c</i>         | 0.109295378 | 0.029881837 | Mpst_Tg_upregulation |
| NM_183225    | <i>Usp24</i>         | 0.108790806 | 0.010166506 | Mpst_Tg_upregulation |
| NM_172924    | <i>Peak1</i>         | 0.107973426 | 0.02700555  | Mpst_Tg_upregulation |
| NM_001081269 | <i>Whsc111</i>       | 0.107807458 | 0.016797396 | Mpst_Tg_upregulation |
| NM_198105    | <i>Fam120c</i>       | 0.107283997 | 0.038932311 | Mpst_Tg_upregulation |
| NM_008304    | <i>Sdc2</i>          | 0.106503405 | 0.044299789 | Mpst_Tg_upregulation |
| NM_011993    | <i>Dpysl4</i>        | 0.106187419 | 0.01413415  | Mpst_Tg_upregulation |
| NM_183186    | <i>Foxn3</i>         | 0.105818485 | 0.030471424 | Mpst_Tg_upregulation |
| NM_001111015 | <i>Syn2</i>          | 0.105356485 | 0.039328635 | Mpst_Tg_upregulation |
| NM_027184    | <i>Ipmk</i>          | 0.105187454 | 0.047927539 | Mpst_Tg_upregulation |
| NM_007839    | <i>Dhx15</i>         | 0.104568458 | 0.020611037 | Mpst_Tg_upregulation |
| NM_011840    | <i>Map2k5</i>        | 0.103739092 | 0.023164972 | Mpst_Tg_upregulation |
| NM_001114399 | <i>Zmym4</i>         | 0.102152118 | 0.037595264 | Mpst_Tg_upregulation |
| NM_001081225 | <i>Fam178a</i>       | 0.101906661 | 0.041923766 | Mpst_Tg_upregulation |
| NM_178686    | <i>Cep120</i>        | 0.101671324 | 0.010994453 | Mpst_Tg_upregulation |
| NM_008891    | <i>Pnn</i>           | 0.099712809 | 0.041446495 | Mpst_Tg_upregulation |
| NM_008514    | <i>Lrp6</i>          | 0.098793445 | 0.002462072 | Mpst_Tg_upregulation |
| NM_020577    | <i>As3mt</i>         | 0.098156197 | 0.018514747 | Mpst_Tg_upregulation |
| NM_001287164 | <i>Nup98</i>         | 0.09787947  | 0.016269305 | Mpst_Tg_upregulation |
| NM_001289895 | <i>Tns1</i>          | 0.097496584 | 0.035554333 | Mpst_Tg_upregulation |
| NM_024200    | <i>Mfn1</i>          | 0.097166871 | 0.028653334 | Mpst_Tg_upregulation |
| NM_001002239 | <i>Rpl17</i>         | 0.095957441 | 0.03106892  | Mpst_Tg_upregulation |
| NM_172861    | <i>Slc7a14</i>       | 0.095945615 | 0.036902682 | Mpst_Tg_upregulation |
| NM_011992    | <i>Rcn2</i>          | 0.095103998 | 0.020871459 | Mpst_Tg_upregulation |
| NM_028643    | <i>Micu2</i>         | 0.094989597 | 0.009070543 | Mpst_Tg_upregulation |
| NM_178880    | <i>Son</i>           | 0.094428253 | 0.003497809 | Mpst_Tg_upregulation |
| NM_010833    | <i>Msn</i>           | 0.093799098 | 0.020072687 | Mpst_Tg_upregulation |
| NM_172409    | <i>Fnnl2</i>         | 0.093340523 | 0.044386524 | Mpst_Tg_upregulation |
| NM_008943    | <i>Psen1</i>         | 0.092272985 | 0.047971857 | Mpst_Tg_upregulation |
| NM_001033463 | <i>Tatdn2</i>        | 0.092163264 | 0.029395861 | Mpst_Tg_upregulation |
| NM_025481    | <i>Smurf2</i>        | 0.091721329 | 0.042637911 | Mpst_Tg_upregulation |
| NM_201609    | <i>Zfp652</i>        | 0.09171575  | 0.020021386 | Mpst_Tg_upregulation |
| NM_001081154 | <i>Marf1</i>         | 0.091572363 | 0.001848743 | Mpst_Tg_upregulation |
| NM_198304    | <i>Nup188</i>        | 0.08865017  | 0.007600754 | Mpst_Tg_upregulation |
| NM_177301    | <i>Hnrnp1</i>        | 0.086948237 | 0.048580908 | Mpst_Tg_upregulation |
| NM_001301643 | <i>Pitpnb</i>        | 0.084897997 | 0.011889065 | Mpst_Tg_upregulation |

|              |                 |             |             |                      |
|--------------|-----------------|-------------|-------------|----------------------|
| NM_001039184 | <i>Cep350</i>   | 0.084049132 | 0.019462    | Mpst_Tg_upregulation |
| NM_054043    | <i>Msi2</i>     | 0.083640112 | 0.033846741 | Mpst_Tg_upregulation |
| NM_001081149 | <i>Kat6a</i>    | 0.081050949 | 0.024866657 | Mpst_Tg_upregulation |
| NM_011508    | <i>Ejfl</i>     | 0.080327472 | 0.0448991   | Mpst_Tg_upregulation |
| NM_148930    | <i>Rbm5</i>     | 0.078794425 | 0.045056276 | Mpst_Tg_upregulation |
| NM_010568    | <i>Insr</i>     | 0.078566758 | 0.029379726 | Mpst_Tg_upregulation |
| NM_146122    | <i>Dennd1a</i>  | 0.078498225 | 0.026498043 | Mpst_Tg_upregulation |
| NM_009128    | <i>Scd2</i>     | 0.077051882 | 0.028704311 | Mpst_Tg_upregulation |
| NM_001164199 | <i>Prkacb</i>   | 0.076157807 | 0.011678876 | Mpst_Tg_upregulation |
| NM_177324    | <i>Sbf2</i>     | 0.074778188 | 0.036554384 | Mpst_Tg_upregulation |
| NM_011032    | <i>P4hb</i>     | 0.073640522 | 0.020279042 | Mpst_Tg_upregulation |
| NM_007896    | <i>Mapre1</i>   | 0.072175064 | 0.006746147 | Mpst_Tg_upregulation |
| NM_008306    | <i>Ndst1</i>    | 0.070951794 | 0.041731728 | Mpst_Tg_upregulation |
| NM_001081221 | <i>Ercc6</i>    | 0.069757451 | 0.032996899 | Mpst_Tg_upregulation |
| NM_030035    | <i>Golgb1</i>   | 0.069380169 | 0.002616463 | Mpst_Tg_upregulation |
| NM_009007    | <i>Rac1</i>     | 0.06908682  | 0.02118356  | Mpst_Tg_upregulation |
| NM_146019    | <i>Chd3</i>     | 0.067268571 | 0.045724469 | Mpst_Tg_upregulation |
| NM_011192    | <i>Psme3</i>    | 0.066485857 | 0.02291172  | Mpst_Tg_upregulation |
| NM_029868    | <i>Gpbp111</i>  | 0.064729213 | 0.018338796 | Mpst_Tg_upregulation |
| NM_027558    | <i>Pgrmc2</i>   | 0.062068525 | 0.029438401 | Mpst_Tg_upregulation |
| NM_001081293 | <i>Rprd2</i>    | 0.055019673 | 0.032220024 | Mpst_Tg_upregulation |
| NM_024473    | <i>BC005537</i> | 0.051199764 | 0.024342112 | Mpst_Tg_upregulation |
| NM_007479    | <i>Arf4</i>     | 0.048931637 | 0.047294104 | Mpst_Tg_upregulation |
| NM_153585    | <i>Cnot10</i>   | 0.038768847 | 0.045137754 | Mpst_Tg_upregulation |

**Appendix Table S14. Canonical pathways enriched for dysregulated genes in the frontal cortex of *Mpst* KO and *Mpst* Tg mice.**

| Group                             | Ingenuity Canonical Pathways                      | -log (P-value) | Molecules                                    |
|-----------------------------------|---------------------------------------------------|----------------|----------------------------------------------|
| <i>Mpst</i> KO<br>(downregulated) | Acyl-CoA Hydrolysis                               | 2.23           | PPT1, ACOT8                                  |
|                                   | Hypoxia Signaling in the Cardiovascular System    | 2.19           | UBE2W, UBE2J2, UBE2I, ATF2                   |
|                                   | L-cysteine Degradation III                        | 1.71           | MPST                                         |
|                                   | Thiosulfate Disproportionation III (Rhodanese)    | 1.53           | MPST                                         |
|                                   | Role of BRCA1 in DNA Damage Response              | 1.35           | FAAP24, ATR, MLH1                            |
|                                   | Lysine Degradation                                | 1.32           | AASDH                                        |
| <i>Mpst</i> KO<br>(upregulated)   | Aldosterone Signaling in Epithelial Cells         | 2.11           | CRYAB, ASIC2, PIP5K1C, PIK3R1, DNAJA1, PLCD4 |
|                                   | Ephrin A Signaling                                | 1.63           | FYN, PIK3R1, EFNA3                           |
|                                   | Role of NFAT in Cardiac Hypertrophy               | 1.59           | HDAC4, CAMK1D, PIK3R1, MEF2D, SLC8A2, PLCD4  |
|                                   | NADH Repair                                       | 1.52           | NAXD                                         |
|                                   | D-myo-inositol (1,4,5)-Trisphosphate Biosynthesis | 1.51           | PIP5K1C, PLCD4                               |
|                                   | Rac Signaling                                     | 1.49           | CYFIP2, PIP5K1C, PIK3R1, ANK1                |
|                                   | PI3K Signaling in B Lymphocytes                   | 1.35           | FYN, PIK3R1, FCGR2B, PLCD4                   |
|                                   | 14-3-3-mediated Signaling                         | 1.34           | PIK3R1, PLCD4, SNCA, AKT1S1                  |
|                                   | Inhibition of Angiogenesis by TSP1                | 1.33           | FYN, GUCY1B3                                 |
|                                   | Trehalose Degradation II (Trehalase)              | 1.3            | HK1                                          |
|                                   | Protein Citrullination                            | 1.3            | PADI2                                        |
|                                   | Galactose Degradation I (Leloir Pathway)          | 1.3            | GALK2                                        |

| Group                             | Ingenuity Canonical Pathways                | -log (P-value)                                                      | Molecules                                                                                                                               |
|-----------------------------------|---------------------------------------------|---------------------------------------------------------------------|-----------------------------------------------------------------------------------------------------------------------------------------|
| <i>Mpst</i> Tg<br>(downregulated) | Phagosome Maturation                        | 4.32                                                                | ATP6V0E2, ATP6V0C, VTI1A, ATP6V1C1, PRDX5, TUBA4A, ATP6V1A, SNAP25, DYNC1L1L2, ATP6V1H, ATP6V0D1, ATP6V1G2, NAPA, ATP6V1B2              |
|                                   | Glycolysis I                                | 4.27                                                                | PGK1, ENO1, TPI1, PFKL, PFKP, PFKM                                                                                                      |
|                                   | TCA Cycle II (Eukaryotic)                   | 3.41                                                                | SUCLA2, SDHB, IDH3G, MDH1, IDH3B                                                                                                        |
|                                   | Dopamine-DARPP32 Feedback in cAMP Signaling | 3.29                                                                | ADCY2, Calm1 (includes others), CSNK1G2, KCNJ9, ADCY1, CAMKK1, PRKAR1B, GNAI1, KCNJ3, PPP2R2C, KCNJ6, CAMKK2, CALY                      |
|                                   | Cardiac Hypertrophy Signaling               | 3.15                                                                | MAP2K4, ADCY2, Calm1 (includes others), PIK3R1, GNAI1, ATF6, GNG3, ADCY1, PRKAR1B, MAPK10, EIF2B1, MYL4, MEF2C, MAPKAPK2, FNBP1, ADRA1A |
|                                   | Parkinson's Signaling                       | 3.14                                                                | SEPT5, PARK7, CYCS, SNCA                                                                                                                |
|                                   | Mitochondrial Dysfunction                   | 3.12                                                                | MAP2K4, SDHB, NDUFA9, PRDX5, PDHA1, PARK7, GPD2, TXN2, NDUFA6, MAPK10, NDUFB6, CYCS, SNCA                                               |
|                                   | IL-1 Signaling                              | 3.08                                                                | MAP2K4, IKKB, ADCY2, TOLLIP, ADCY1, PRKAR1B, MAPK10, GNAI1, GNG3                                                                        |
|                                   | G-Protein Coupled Receptor Signaling        | 2.86                                                                | ADCY2, GRM2, GRM3, PIK3R1, SSTR3, GNAI1, PDE1A, CHRM3, CHRM1, IKKB, GABBR2, GDE1, ADCY1, PRKAR1B, HTR1F, ADRA1A, HTR2A                  |
|                                   | G α i Signaling                             | 2.82                                                                | GABBR2, ADCY2, GRM2, GRM3, SSTR3, ADCY1, PRKAR1B, GNAI1, HTR1F, GNG3                                                                    |
|                                   | AMPK Signaling                              | 2.65                                                                | CHRNA4, PIK3R1, PFKL, PFKP, CHRM3, CHRM1, PFKM, AK5, PRKAR1B, AK4, PPP2R2C, HMGC, ADRA1A, CAMKK2                                        |
|                                   | cAMP-mediated signaling                     | 2.45                                                                | GABBR2, ADCY2, GRM2, Calm1 (includes others), GRM3, GDE1, ADCY1, SSTR3, PRKAR1B, GNAI1, HTR1F, PDE1A, CHRM1, CHRM3                      |
|                                   | G Beta Gamma Signaling                      | 2.43                                                                | ADCY2, PAK1, KCNJ9, ADCY1, PRKAR1B, GNAI1, KCNJ3, KCNJ6, GNG3                                                                           |
|                                   | Calcium Signaling                           | 2.4                                                                 | CHRNA4, Calm1 (includes others), TNNC1, HDAC7, CAMKK1, PRKAR1B, Tpm1, MYL4, MEF2C, TRPC6, GRIA4, CAMKK2, GRIA3                          |
|                                   | PRPP Biosynthesis I                         | 2.38                                                                | PRPS2, PRPS1                                                                                                                            |
|                                   | Acetate Conversion to Acetyl-CoA            | 2.38                                                                | ACSS2, ACSL1                                                                                                                            |
|                                   | Glutamate Receptor Signaling                | 2.38                                                                | GRM2, Calm1 (includes others), GRM3, SLC17A7, GRIA4, GRIA3                                                                              |
|                                   | CREB Signaling in Neurons                   | 2.3                                                                 | POLR2G, ADCY2, GRM2, Calm1 (includes others), GRM3, PIK3R1, ADCY1, PRKAR1B, POLR2J, GNAI1, GNG3, GRIA4, GRIA3                           |
|                                   | Sirtuin Signaling Pathway                   | 2.23                                                                | PGK1, SDHB, SLC25A4, NDUFA9, TUBA4A, BECN1, PFKM, PDHA1, ATG4C, ATG9A, NDUFA6, ACSS2, CLOCK, NDUFB6, LDHA, KAT2A                        |
|                                   | Huntington's Disease Signaling              | 2.09                                                                | MAP2K4, SDHB, VTI1A, PIK3R1, POLR2J, GNG3, STX1A, SNAP25, POLR2G, DNMI1, HDAC7, CYCS, NAPA, SNCA                                        |
| α -Adrenergic Signaling           | 2.04                                        | ADCY2, Calm1 (includes others), ADCY1, PRKAR1B, GNAI1, GNG3, ADRA1A |                                                                                                                                         |

|                                               |                                                   |      |                                                                                                                                              |
|-----------------------------------------------|---------------------------------------------------|------|----------------------------------------------------------------------------------------------------------------------------------------------|
| <b><i>Mpst Tg</i></b><br><b>(upregulated)</b> | Gap Junction Signaling                            | 3.52 | PRKACB, ITPR2, GRIA1, GRIA4, HTR2C, PLCE1, KL, MAPK3, CAV1, GRIK2, NPR2, MAP2K5, EGFR                                                        |
|                                               | Neuropathic Pain Signaling in Dorsal Horn Neurons | 3.09 | PRKACB, KCNN3, NTRK2, PLCE1, KL, ITPR2, MAPK3, GRIA1, GRIA4                                                                                  |
|                                               | Axonal Guidance Signaling                         | 2.74 | PRKACB, ADAM17, ADAMTS13, RGS3, ADAMTS1, RAC1, DPYSL5, HHIP, ROCK1, VEGFA, NTRK2, PLCE1, GLIS2, SDC2, KL, MAPK3, DCC, SEMA4G, PLXNB2, SEMA4B |
|                                               | Choline Biosynthesis III                          | 2.63 | PLD2, GPLD1, PHKA1                                                                                                                           |
|                                               | CMP-N-acetylneuramate Biosynthesis I (Eukaryotes) | 2.36 | GNE, NAGK                                                                                                                                    |
|                                               | STAT3 Pathway                                     | 2.3  | PIAS3, NTRK2, MAPK3, RAC1, INSR, EGFR                                                                                                        |
|                                               | Semaphorin Signaling in Neurons                   | 2.27 | ROCK1, MAPK3, DPYSL4, RAC1, DPYSL5                                                                                                           |

**Appendix Table S15. Results of genomic quantitative PCR for *Mpst*.**

| <b>Mouse strain</b> | <b><i>Mpst</i> (Exon4)<br/>Mm00615042_cn<sup>a</sup></b> | <b><i>Tfrc</i><br/>(Cat# 4458366)<sup>b</sup></b> | <b><i>Mpst/Tfrc</i><sup>c</sup></b> |
|---------------------|----------------------------------------------------------|---------------------------------------------------|-------------------------------------|
| B6 ( <i>n</i> = 4)  | 16.281                                                   | 18.107                                            | 0.899                               |
| C3H ( <i>n</i> = 4) | 9.617                                                    | 9.933                                             | 0.968                               |

<sup>a</sup> TaqMan assay I.D.

<sup>b</sup> Used as an internal control probe from catalogue No. of Life Technologies™ (Carlsbad, CA, USA)

<sup>c</sup> Relative quantity of PCR product

**Appendix Table S16. Genetic association analyses of *MPST* and *CBS* with schizophrenia.**

| Gene        |                       | HWE <sup>a</sup> | N               | Allele |      | <i>P</i> value<br>(Fisher's exact<br>Test) | Genotype               |        |      | <i>P</i> value<br>(Fisher's exact<br>Test) | MAF <sup>b</sup> |        |
|-------------|-----------------------|------------------|-----------------|--------|------|--------------------------------------------|------------------------|--------|------|--------------------------------------------|------------------|--------|
| <i>MPST</i> | Tag SNP1              |                  |                 | T      | C    |                                            | T/T                    | T/C    | C/C  |                                            |                  |        |
|             | rs5756489             | SC <sup>c</sup>  | 0.1638          | 2011   | 1270 | 2752                                       | 0.1404                 | 214    | 842  | 955                                        | 0.2865           | 31.58% |
|             |                       | CT <sup>d</sup>  | 0.5184          | 2166   | 1434 | 2898                                       |                        | 244    | 946  | 976                                        |                  | 33.10% |
|             | Tag SNP2<br>rs2187723 |                  |                 |        |      |                                            | Not reliable genotyped |        |      |                                            |                  |        |
|             | Tag SNP3              |                  |                 |        | A    | G                                          |                        | A/A    | A/G  | G/G                                        |                  |        |
|             | rs5756492             | SC <sup>c</sup>  | 0.0309          | 2011   | 2893 | 1129                                       | 0.2654                 | 1060   | 773  | 178                                        | 0.3416           | 28.07% |
|             |                       | CT <sup>d</sup>  | 0.3834          | 2167   | 2167 | 1265                                       |                        | 1095   | 879  | 193                                        |                  | 29.19% |
|             | Tag SNP4              |                  |                 |        | A    | G                                          |                        | A/A    | A/G  | G/G                                        |                  |        |
|             | rs5750373             | SC <sup>c</sup>  | 0.0925          | 2008   | 2947 | 1069                                       | 0.3883                 | 1096   | 755  | 157                                        | 0.6081           | 26.62% |
|             |                       | CT <sup>d</sup>  | 0.3029          | 2166   | 3142 | 1190                                       |                        | 1149   | 844  | 173                                        |                  | 27.47% |
|             | <i>CBS</i>            | Tag SNP1         |                 |        | T    | C                                          |                        | T/T    | T/C  | C/C                                        |                  |        |
|             |                       | rs8132811        | SC <sup>c</sup> | 0.7493 | 2009 | 533                                        | 3485                   | 0.2955 | 37   | 459                                        | 1513             | 0.4677 |
|             |                       | CT <sup>d</sup>  | 0.5764          | 2170   | 542  | 3798                                       | 31                     |        | 480  | 1659                                       | 12.49%           |        |
| Tag SNP2    |                       |                  |                 |        | A    | G                                          |                        | A/A    | A/G  | G/G                                        |                  |        |
| rs9325622   |                       | SC <sup>c</sup>  | 0.3594          | 2010   | 1932 | 2088                                       | 0.3239                 | 454    | 1024 | 532                                        | 0.4609           | 48.06% |
|             |                       | CT <sup>d</sup>  | 0.0451          | 2167   | 2036 | 2298                                       |                        | 455    | 1126 | 586                                        |                  | 46.98% |

|                      |                                                                                 |        |      |      |      |        |     |     |      |        |        |
|----------------------|---------------------------------------------------------------------------------|--------|------|------|------|--------|-----|-----|------|--------|--------|
| Tag SNP3             |                                                                                 |        |      | T    | C    |        | T/T | T/C | C/C  |        |        |
| rs1789953            | SC <sup>c</sup>                                                                 | 0.9039 | 2009 | 478  | 3540 | 0.5913 | 29  | 420 | 1560 | 0.8144 | 11.90% |
|                      | CT <sup>d</sup>                                                                 | 0.5186 | 2168 | 533  | 3803 |        | 36  | 461 | 1671 |        | 12.29% |
| Tag SNP4<br>rs234705 | Could not be genotyped because of the existence of a neighboring SNP, rs1788466 |        |      |      |      |        |     |     |      |        |        |
| Tag SNP5             |                                                                                 |        |      | T    | C    |        | T/T | T/C | C/C  |        |        |
| rs2851391            | SC <sup>c</sup>                                                                 | 0.8752 | 2009 | 1402 | 2616 | 0.4473 | 243 | 916 | 850  | 0.6549 | 34.89% |
|                      | CT <sup>d</sup>                                                                 | 0.3832 | 2169 | 1479 | 2859 |        | 243 | 993 | 933  |        | 34.09% |
| Tag SNP6<br>rs234712 | Could not be genotyped because of the existence of a neighboring SNP, rs2849728 |        |      |      |      |        |     |     |      |        |        |
| Tag SNP7             |                                                                                 |        |      | T    | G    |        | T/T | T/G | G/G  |        |        |
| rs397589             | SC <sup>c</sup>                                                                 | 0.8252 | 2008 | 638  | 3378 | 0.9523 | 52  | 534 | 1422 | 0.9956 | 15.89% |
|                      | CT <sup>d</sup>                                                                 | 0.8802 | 2168 | 691  | 3645 |        | 56  | 579 | 1533 |        | 15.94% |
| Promoter SNP1        |                                                                                 |        |      | T    | C    |        | T/T | T/C | C/C  |        |        |
| rs1788484            | SC                                                                              | 0.2875 | 2007 | 968  | 3046 | 0.1791 | 108 | 752 | 1147 | 0.1473 | 24.12% |
|                      | CT                                                                              | 0.3483 | 2167 | 991  | 3343 |        | 121 | 749 | 1297 |        | 22.87% |
| Promoter SNP2        |                                                                                 |        |      | G    | C    |        | G/G | G/C | C/C  |        |        |
| rs2850144            | SC                                                                              | 0.7418 | 2009 | 2577 | 1411 | 0.4098 | 823 | 931 | 255  | 0.7076 | 35.86% |
|                      | CT                                                                              | 0.7578 | 2166 | 2816 | 1516 |        | 912 | 992 | 262  |        | 35.00% |

<sup>a</sup> HWE: Hardy-Weinberg equilibrium

<sup>b</sup> MAF: minor allele frequency

<sup>c</sup> SC: schizophrenia

<sup>d</sup> CT: control

**Appendix Table S17. Primer sequences used for DNA methylation analysis and PCR product length.**

**Human**

| MPST CpG153 | Primer Name     | Primer Sequence                                        | Product Length |
|-------------|-----------------|--------------------------------------------------------|----------------|
| #7          | MPST_CpG153#7-L | aggaagagagTTTTTAAGGTAGAGGGGGTGG                        | 156bp          |
|             | MPST_CpG153#7-R | cagtaatcgactcactatagggagaaggctCCTAATCCACCTAAAACAAAAACA |                |
| #8          | MPST_CpG153#8-L | aggaagagagTTGTTTTAGGTGGATTAGGGGTT                      | 640bp          |
|             | MPST_CpG153#8-R | cagtaatcgactcactatagggagaaggctCCCCCTCCAAAAAACAAAC      |                |
| #9          | MPST_CpG153#9-L | aggaagagagGTTTGTTTTTTGGAGGGGG                          | 225bp          |
|             | MPST_CpG153#9-R | cagtaatcgactcactatagggagaaggctCTCTCTAATACCACCAAATCACCC |                |

  

| MPST CpG89 | Primer Name     | Primer Sequence                                           | Product Length |
|------------|-----------------|-----------------------------------------------------------|----------------|
| #2         | MPST_CpG89#2-L  | aggaagagagTATATGAGGTTTGGTAGAGGGAGGT                       | 322bp          |
|            | MPST_CpG89#2-R  | cagtaatcgactcactatagggagaaggctTCCAACAACCTACAAAACTACCCAA   |                |
| #7         | MPST_CpG89#7-L  | aggaagagagGTTGGGTAGTTTTGTAGTTGTTGG                        | 453bp          |
|            | MPST_CpG89#7-R  | cagtaatcgactcactatagggagaaggctAAATTCCAAATTCTCCTTAATATCCTC |                |
| #8         | MPST_CpG89#8-L  | aggaagagagGAGGATATTAAGGAGAATTTGGAAT                       | 178bp          |
|            | MPST_CpG89#8-R  | cagtaatcgactcactatagggagaaggctAAAAAAAATCAAATCCAAAACACTA   |                |
| #18        | MPST_CpG89#18-L | aggaagagagTAAAAGAAAGTTAAGTTTAGGGTATTG                     | 178bp          |
|            | MPST_CpG89#18-R | cagtaatcgactcactatagggagaaggctAACATCAAAAAAACCTAAAATCCC    |                |



| CBS CpG227 | Primer Name     | Primer Sequence                                               | Product Length |
|------------|-----------------|---------------------------------------------------------------|----------------|
| #17        | CBS_CpG227#17-L | aggaagagagGGATTTTTGGGTTTATTTGTTTTTA                           | 574            |
|            | CBS_CpG227#17-R | cagtaatacgactcactatagggagaaggctTCTAACACAAACCCTATCTAACCTAA     |                |
| #24        | CBS_CpG227#24-L | aggaagagagTTTTTTGGATAGAGGATTTTAATTGG                          | 616            |
|            | CBS_CpG227#24-R | cagtaatacgactcactatagggagaaggctAAACAAAACATAAAACCAATAAACCCA    |                |
| #13        | CBS_CpG227#13-L | aggaagagagGAGATTTTTGTTTAGAGAGGGGAG                            | 583            |
|            | CBS_CpG227#13-R | cagtaatacgactcactatagggagaaggctTCAAACATCAATAAAAATTCCTT        |                |
| #26        | CBS_CpG227#26-L | aggaagagagGGGGTTTGGGATTTTTATTTAGTT                            | 484            |
|            | CBS_CpG227#26-R | cagtaatacgactcactatagggagaaggctCTATTTTACTTAATTAACCTCTTACCCTTC |                |
| #28        | CBS_CpG227#28-L | aggaagagagGTTTTTTGTTTAGAGTTGATGGGT                            | 124            |
|            | CBS_CpG227#28-R | cagtaatacgactcactatagggagaaggctCTTTCAAAACATAAACCTAATCCCC      |                |

| CAT CpG58 | Primer Name   | Primer Sequence                                         | Product Length |
|-----------|---------------|---------------------------------------------------------|----------------|
| #1        | CAT_CpG58#1-L | aggaagagagTGTTGATTTTTTAAGAGTTGAGAAAGT                   | 313            |
|           | CAT_CpG58#1-R | cagtaatacgactcactatagggagaaggctCAAACCAAATTAATAACCAATAA  |                |
| #3        | CAT_CpG58#3-L | aggaagagagTTATTGGGTTTTAATTTGGTTTG                       | 151            |
|           | CAT_CpG58#3-R | cagtaatacgactcactatagggagaaggctCCCTCAACAACAAATCTACCTATT |                |
| #5        | CAT_CpG58#5-L | aggaagagagAATAGGTAGATTTGTTTGTGAGGG                      | 472            |
|           | CAT_CpG58#5-R | cagtaatacgactcactatagggagaaggctAACTCTCTACCTCTTCCCATAAA  |                |

**Mouse**

| Mpst CpG28 | Primer Name    | Primer Sequence                                          | Product Length |
|------------|----------------|----------------------------------------------------------|----------------|
| #4         | Mpst_CpG28#4-L | aggaagagagGGTGAAAGGGTTTTAGGTATTTTGT                      | 437            |
|            | Mpst_CpG28#4-R | cagtaatacgactcactatagggagaaggctTAAACACAACCCACTATTTAAACCA |                |

| Mpst CpG64 | Primer Name    | Primer Sequence                                               | Product Length |
|------------|----------------|---------------------------------------------------------------|----------------|
| #1         | Mpst_CpG64#1-L | aggaagagagGAATGTAGGTTTGTTTTTTTATTTTGG                         | 497            |
|            | Mpst_CpG64#1-R | cagtaatacgactcactatagggagaaggctTAAACAAATTCTAATTCAACCAATAAC    |                |
| #7         | Mpst_CpG64#7-L | aggaagagagTGGTTGAATTAGAATTTGTTAATTAGTTT                       | 305            |
|            | Mpst_CpG64#7-R | cagtaatacgactcactatagggagaaggctCCTTTACTCTATATACATATAAAACCAACA |                |

| Cbs CpG82 | Mouse          | Primer Sequence                                          | Length |
|-----------|----------------|----------------------------------------------------------|--------|
| #12       | Cbs_CpG82#12-L | aggaagagagGATTTTTTTAGTTTTGGATGGAGAT                      | 327    |
|           | Cbs_CpG82#12-R | cagtaatacgactcactatagggagaaggctTAACCCAAAATATCCTACTTCCCTC |        |
| #19       | Cbs_CpG82#19-L | aggaagagagGGGATTTGAGTTGGGATTTTGT                         | 498    |
|           | Cbs_CpG82#19-R | cagtaatacgactcactatagggagaaggctACCAATACCCCAAAAACAATTTAC  |        |
| #20       | Cbs_CpG82#20-L | aggaagagagTGGGTATAGATTTGGGGTTTTTTT                       | 305    |
|           | Cbs_CpG82#20-R | cagtaatacgactcactatagggagaaggctAATCTAAAACCAACCCAACCACA   |        |

| Sod1 CpG87 | Primer Name | Primer Sequence                                             | Product Length |
|------------|-------------|-------------------------------------------------------------|----------------|
| #3         | Sod1_#3-L   | aggaagagagAAAGTTGGAAATGATATTGGGTATTT                        | 700            |
|            | Sod1_#3-R   | cagtaatacgactcactatagggagaaggctCAACCCCTACCCCAAACCAC         |                |
| #4         | Sod1_#4-L   | aggaagagagGTGGTTTGGGGTAGGGGTTG                              | 304            |
|            | Sod1_#4-R   | cagtaatacgactcactatagggagaaggctCCTAATACAAAACAACCCAAAACCTTTA |                |

| Sod2 CpG88 | Primer Name | Primer Sequence                                          | Product Length |
|------------|-------------|----------------------------------------------------------|----------------|
| #1         | Sod2_#1-L   | aggaagagagAGGAAAGTTTTAGGGTTTTTTAGAAG                     | 210            |
|            | Sod2_#1-R   | cagtaatacgactcactatagggagaaggctTCTCCCCTATACCAAATTAATAAAA |                |
| #3         | Sod2_#3-L   | aggaagagagGGTTTTTATTAATTTGGTATAGGGGA                     | 392            |
|            | Sod2_#3-R   | cagtaatacgactcactatagggagaaggctACCACAAAACCCAACCTCCTAC    |                |
| #4         | Sod2_#4-L   | aggaagagagGGTAGGAGGTTGGGTTTTGTG                          | 399            |
|            | Sod2_#4-R   | cagtaatacgactcactatagggagaaggctAAAACCACCACCAATACTAATAACA |                |

| Cat CpG30 | Primer Name | Primer Sequence                                         | Product Length |
|-----------|-------------|---------------------------------------------------------|----------------|
| #2        | Cat_#2-L    | aggaagagagGTTGATTGGTGGAGTTTGAAGTTAT                     | 492            |
|           | Cat_#2-R    | cagtaatacgactcactatagggagaaggctTACAACCTCTTCCACTTTACCCAA |                |

| Gpx1 CpG30 | Primer Name | Primer Sequence                                            | Product Length |
|------------|-------------|------------------------------------------------------------|----------------|
| #5         | Gpx1_#5-L   | aggaagagagAGTTAAAAGGAGGTGTAGGGTTTTG                        | 481            |
|            | Gpx1_#5-R   | cagtaatacgactcactatagggagaaggctTTTTTAAC TACAAAACAAAATTTCCC |                |

| Gpx4 CpG100 | Primer Name | Primer Sequence                                          | Product Length |
|-------------|-------------|----------------------------------------------------------|----------------|
| #1          | Gpx4_#1-L   | aggaagagagTATTTTTAAAGGGTTTTTTAAGGG                       | 500            |
|             | Gpx4_#1-R   | cagtaatacgactcactatagggagaaggctCAATAACCCACCATAATACCTACCA |                |
| #8          | Gpx4_#8-L   | aggaagagagGTTTGGTAGGTATTATGGTGGGTTA                      | 138            |
|             | Gpx4_#8-R   | cagtaatacgactcactatagggagaaggctCACCTAAATACCCCTTCTCTAACT  |                |
| #11         | Gpx4_#11-L  | aggaagagagGTTAGTTAGAGAAGGGGTATTTAGG                      | 462            |
|             | Gpx4_#11-R  | cagtaatacgactcactatagggagaaggctCTAAAAAACTCTTACAACAAAAACC |                |
