# Supplementary material for: Excess hydrogen sulfide and polysulfides production underlies a schizophrenia pathophysiology
Source: PubMed Central journal article supplement (PMC6895609; doi:10.15252/emmm.201910695), 2019-10-28
Supplement: EMMM-11-e10695-s002.pdf [file EMMM-11-e10695-s002.pdf]

## Expanded View Figures

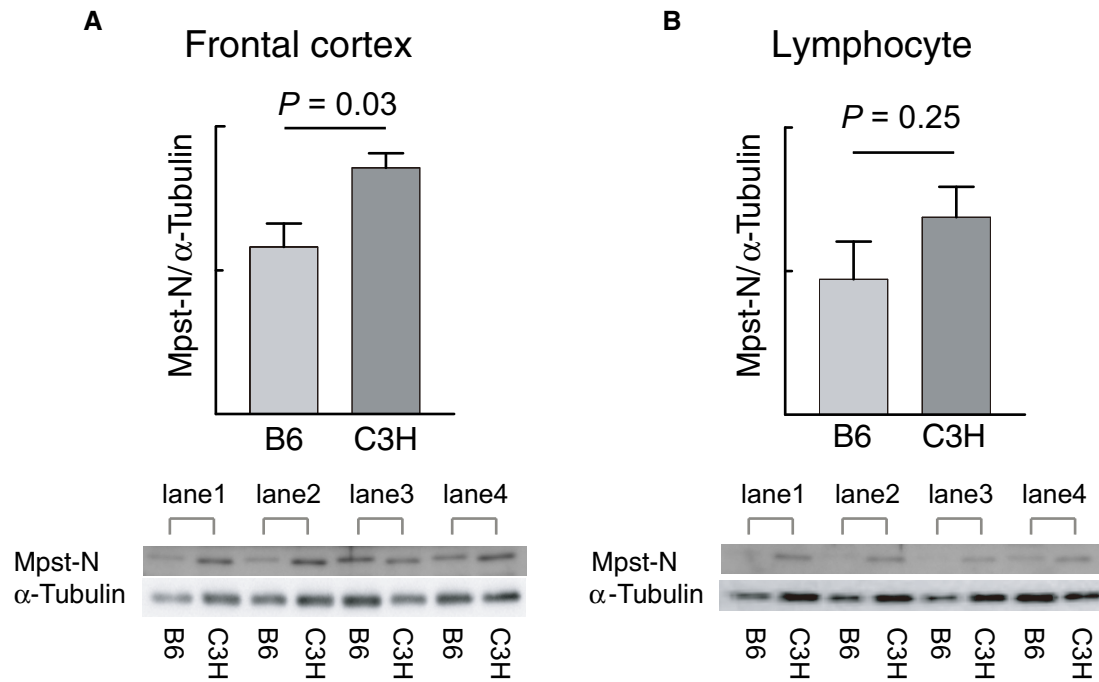

**Figure EV1. Expression of Mpst examined using anti-N-terminal Mpst antibodies.**

A, B Mpst protein levels in the brain and lymphocytes from B6 ( $n = 4$ ) and C3H ( $n = 4$ ) mice were quantified by standard Western blotting with anti-N-terminal Mpst antibodies. The expression levels of Mpst were normalized using  $\alpha$ -tubulin. Bar graphs show the mean expression levels of Mpst in brain (A) and lymphocyte (B) tissues.

Data information:  $P$  values were calculated by using unpaired two-tailed  $t$ -test. The values represent the mean  $\pm$  SD.

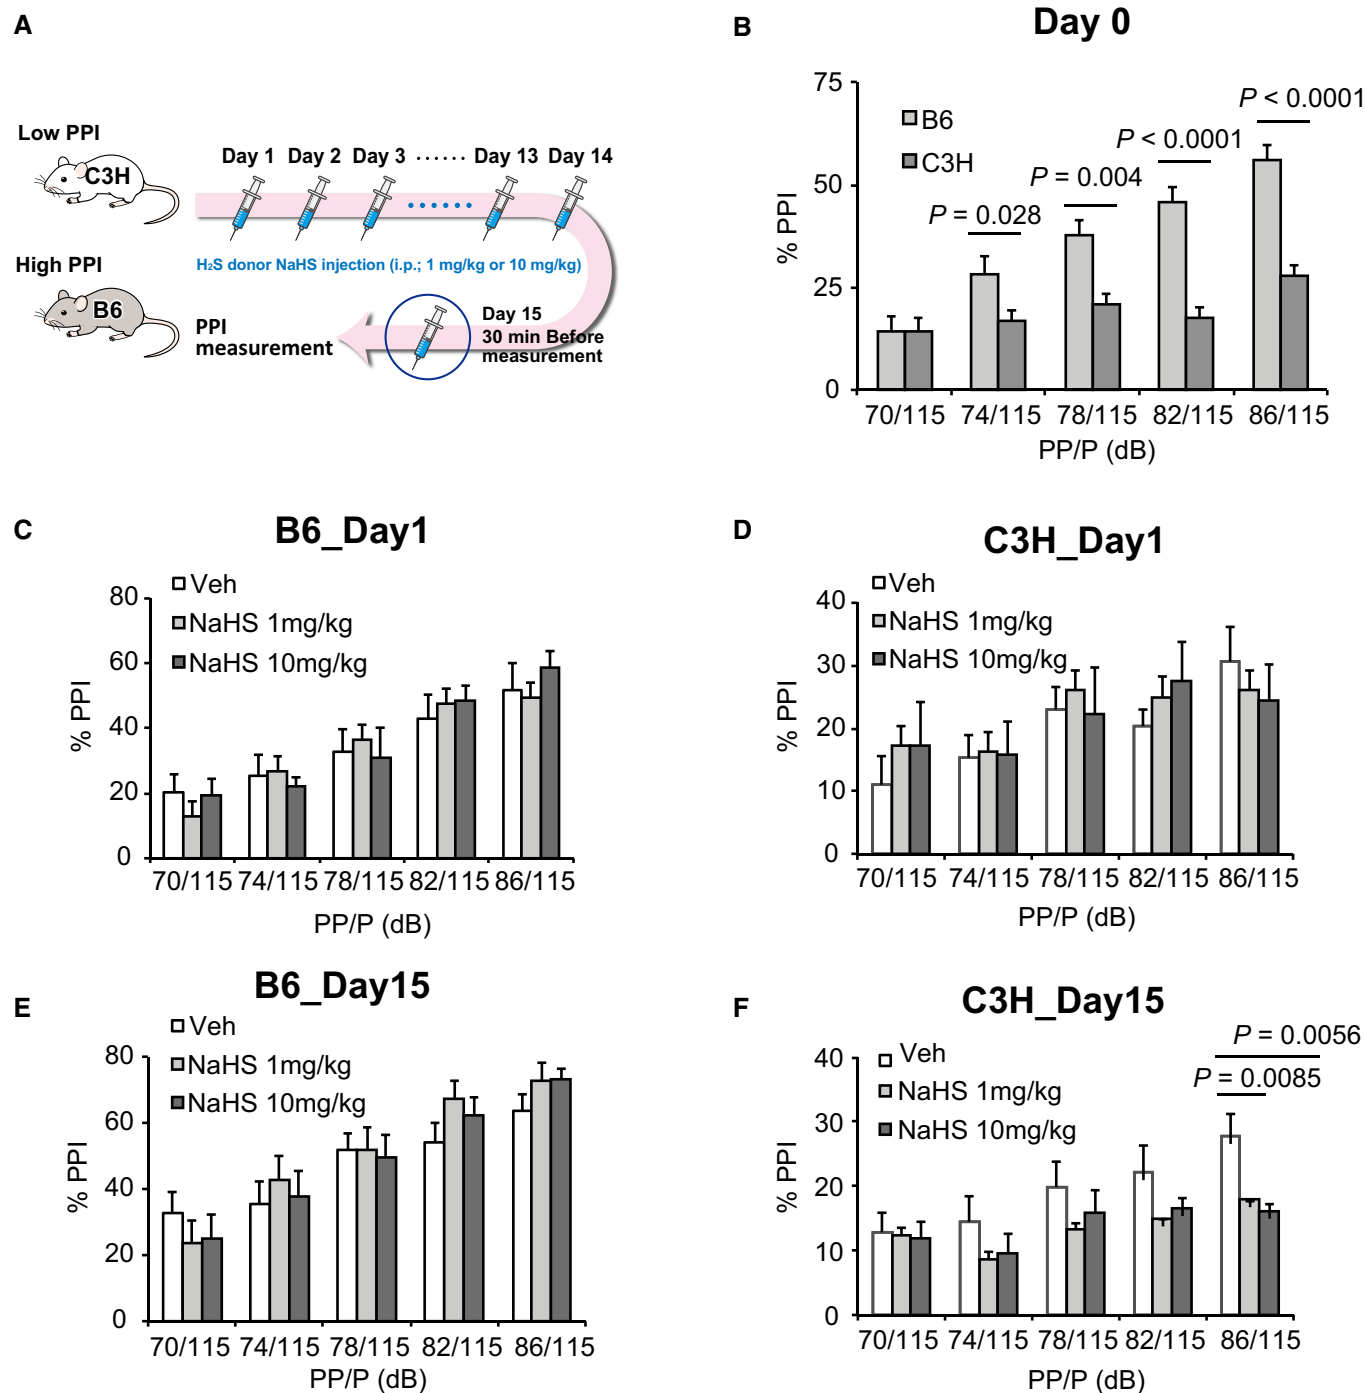

**Figure EV2. Effects of chronic NaHS administration on PPI (prepulse inhibition).**

A Schematic illustration of the experimental design.

B PPI (%) at 5 different prepulse levels between untreated B6 ( $n = 12$ ) and C3H ( $n = 12$ ) mice. X-axis shows prepulse (PP) levels. Pulse (P) sound was 115 dB.

C, D PPI levels of B6 (C) and C3H (D) mice after the first administration of vehicle (Veh: PBS) and two different doses of NaHS. NaHS was intraperitoneally injected once a day, and PPI was measured 30 min after the 1<sup>st</sup> injection. Each dose group contained  $n = 12$  animals.

E, F PPI levels of B6 (E) and C3H (F) mice after the 15<sup>th</sup> administration of vehicle (Veh: PBS) and two different doses of NaHS. NaHS was intraperitoneally injected once a day, and PPI was measured 30 min after the 15<sup>th</sup> injection. Each dose group contained  $n = 12$  animals.

Data information:  $P$  values were calculated using Tukey's *post hoc* test after one-way ANOVA. All data are shown as the mean  $\pm$  SEM.

| Sample | Target      | Copies/microliter* | SEM    |
|--------|-------------|--------------------|--------|
| BA8    | <i>MPST</i> | 259.3              | 38.1   |
| BA8    | <i>CBS</i>  | 2261.7             | 257.5  |
| BA8    | <i>CTH</i>  | 1171.5             | 120.1  |
| iPS    | <i>MPST</i> | 1338.5             | 144.7  |
| iPS    | <i>CBS</i>  | 15214.0            | 1665.2 |
| iPS    | <i>CTH</i>  | 7426.1             | 1969.7 |
| NS     | <i>MPST</i> | 2187.3             | 268.8  |
| NS     | <i>CBS</i>  | 7043.1             | 383.0  |
| NS     | <i>CTH</i>  | 1395.3             | 73.2   |
| HF     | <i>MPST</i> | 2130.9             | 503.1  |
| HF     | <i>CBS</i>  | 103.7              | 22.9   |
| HF     | <i>CTH</i>  | 65.6               | 5.9    |
| Mouse  | <i>Mpst</i> | 1360.8             | -      |
| Mouse  | <i>Cbs</i>  | 1177.5             | -      |
| Mouse  | <i>Cth</i>  | 518.8              | -      |
| PBC    | <i>MPST</i> | 384.1              | 36.8   |
| PBC    | <i>CBS</i>  | 203.2              | 66.0   |
| PBC    | <i>CTH</i>  | 165.2              | 15.1   |

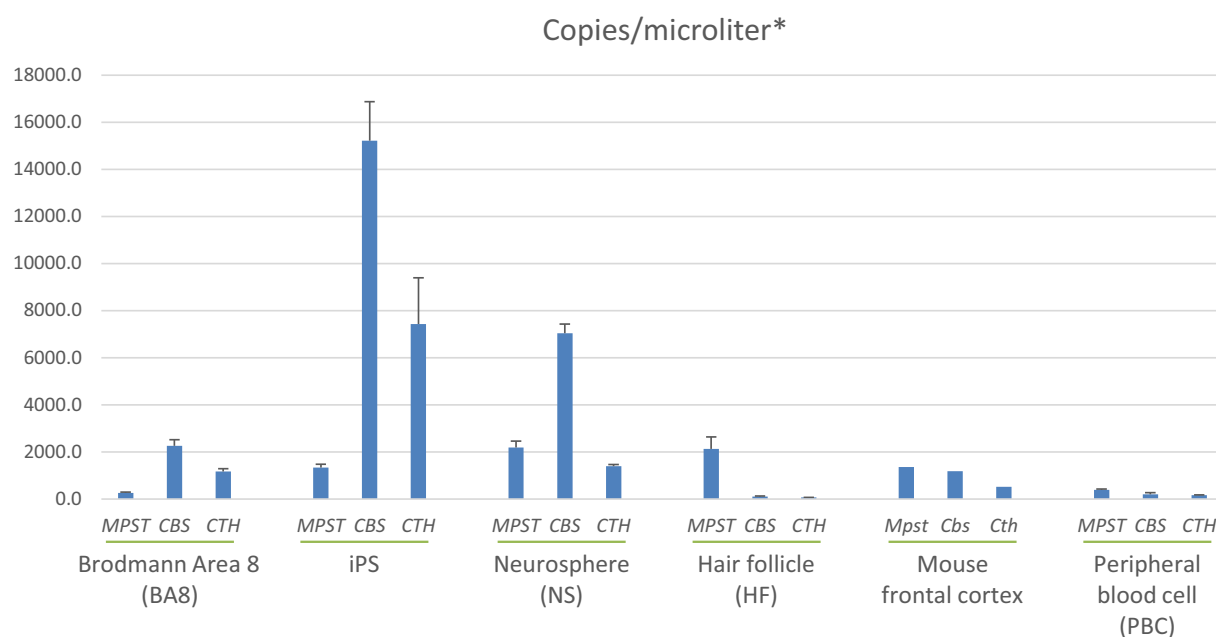

\*Copy number per 1  $\mu$ l of total RNA (10ng)

**Figure EV3. Absolute expression levels of genes for H<sub>2</sub>S-synthesizing enzymes in human and mouse tissues.**

Transcript expression levels were measured by digital PCR. Samples of BA8, iPSC-derived NS, HF, and PBC were from human.

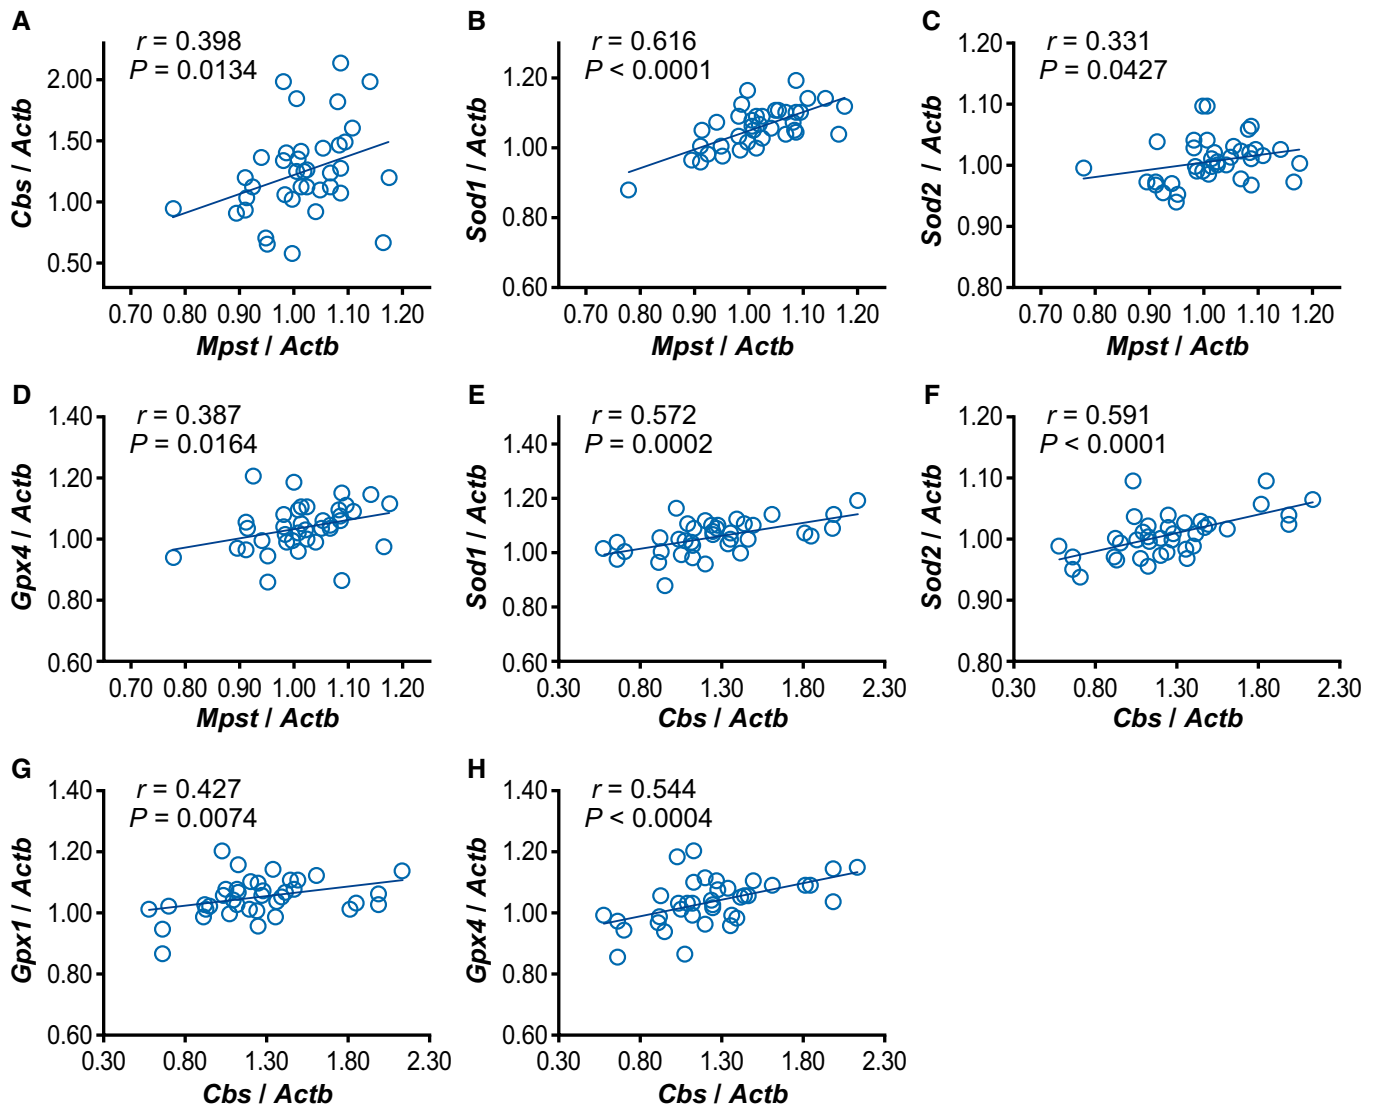

**Figure EV4.** Correlation between expression levels of *Mpst* and *Cbs* (A) and between *Mpst/Cbs* and antioxidant genes (B–H) in poly-I:C administered mice.

A–H Correlation was analyzed using frontal cortex of 38 mice. Each gene expression level was normalized to that of *Actb*.

Data information: Statistical evaluations were performed using Spearman's rank correlation test.

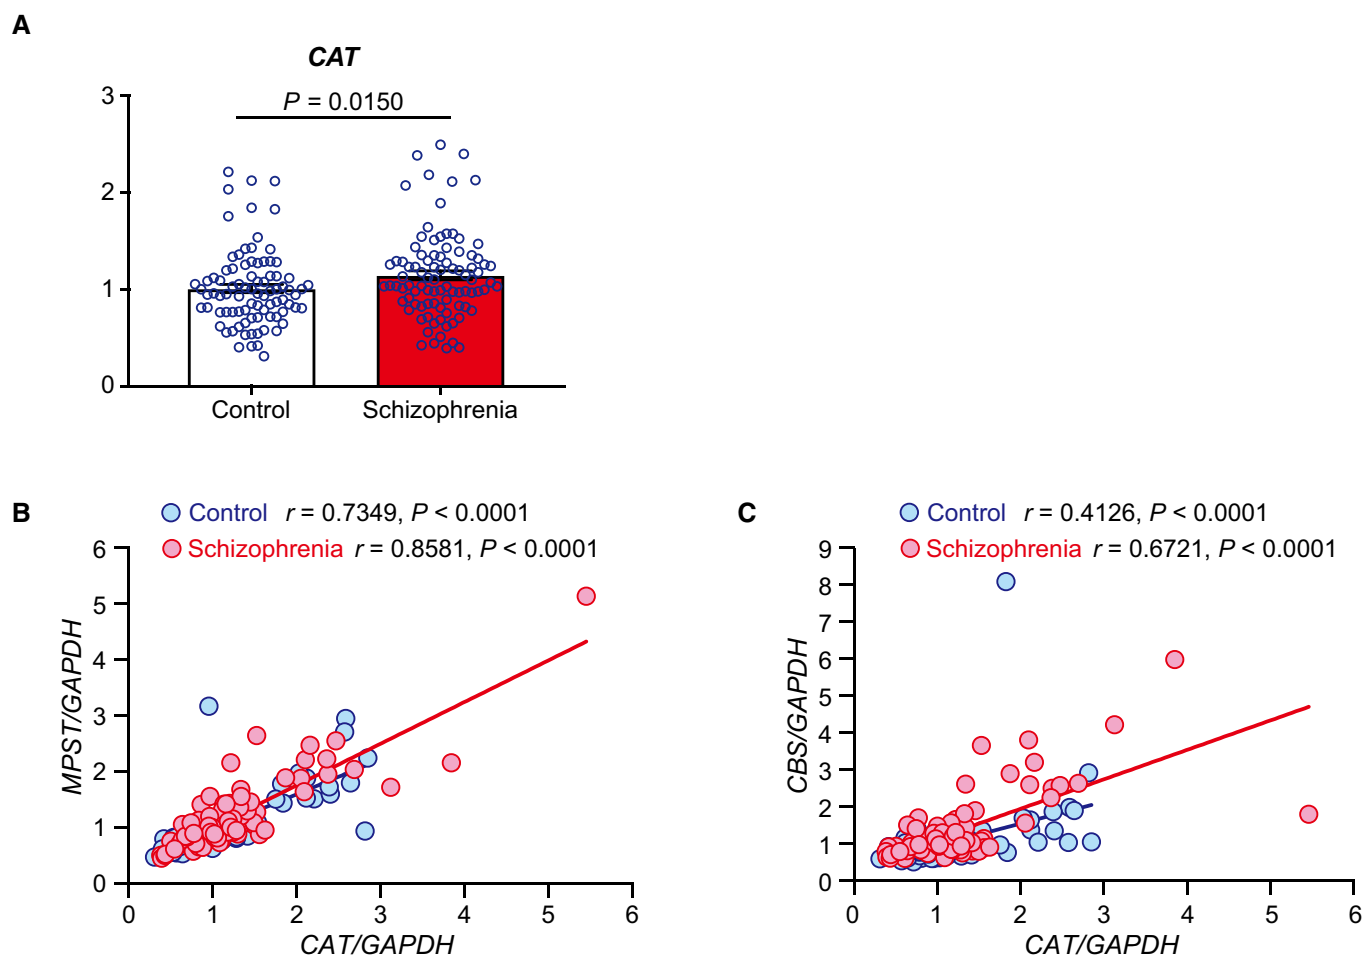

**Figure EV5. Analysis of antioxidant gene *CAT* and genes for H<sub>2</sub>S-synthesizing enzymes in human postmortem brain.**

A Expression levels of *CAT* were measured in the frontal cortex (BA8) from control ( $n = 93$ ) and schizophrenia ( $n = 95$ ) (see Appendix Table S7). The values represent the mean  $\pm$  SEM.

B, C Correlation between expression levels of *CAT* and *MPST*/*CBS*. The same samples as analyzed in (A) were used. Each gene expression level was normalized to that of *GAPDH*.

Data information: Statistical evaluations were performed using Mann–Whitney *U* test (A) and Spearman's rank correlation test (B, C).
