# Supplementary material for: Excess hydrogen sulfide and polysulfides production underlies a schizophrenia pathophysiology
Source: PubMed Central journal article supplement (PMC6895609; doi:10.15252/emmm.201910695), 2019-10-28
Supplement: EMMM-11-e10695-s003.pdf [file EMMM-11-e10695-s003.pdf]

**MATRIX SCIENCE Mascot Search Results**

User :  
 Email :  
 Search title : H180001\_H18  
 MS data file : C:\Program Files\KOMPACT\data\Tsubuka\_Univ\Ide\Y060209C3F\_Lys\_tag\asc\H18.txt  
 Database : MSDB 20050227 (1942918 sequences; 629040812 residues)  
 Taxonomy : Mus musculus (house mouse) (73733 sequences)  
 Timestamp : 18 Jan 2007 at 13:43:38 GMT  
 Top Score : 64 for **THTM\_MOUSE**, 3-mercaptopyruvate sulfurtransferase (EC 2.8.1.2) (MST).- Mus musculus (Mouse).

**Probability Based Mowse Score**

Ions score is  $-10 \cdot \log(P)$ , where P is the probability that the observed match is a random event. Protein scores greater than 61 are significant ( $p < 0.05$ ).

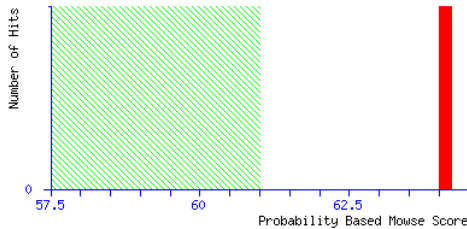

**Concise Protein Summary Report**

Format As  [Help](#)

Significance threshold  $p <$   Max. number of hits

- [THTM\\_MOUSE](#) Mass: 33984 Score: **64** Expect: 0.029 Queries matched: 4  
 3-mercaptopyruvate sulfurtransferase (EC 2.8.1.2) (MST).- Mus musculus (Mouse).

[AAH04079](#) Mass: 34115 Score: **64** Expect: 0.029 Queries matched: 4  
 BC004079 NID: - Mus musculus

[A39962](#) Mass: 129137 Score: 41 Expect: 5.5 Queries matched: 4  
 kinase-related transforming protein (abl) (EC 2.7.1.-) type I - mouse

[Q8C1X4\\_MOUSE](#) Mass: 129075 Score: 41 Expect: 5.5 Queries matched: 4  
 Mus musculus embryo RCB-0545 OHTA cDNA, RIKEN full-length enriched library, clone:G430110C19 produc

[Q6PCM5\\_MOUSE](#) Mass: 131046 Score: 41 Expect: 6 Queries matched: 4  
 Abl1 protein.- Mus musculus (Mouse).

[Q9D5A5\\_MOUSE](#) Mass: 26825 Score: 46 Expect: 1.9 Queries matched: 3  
 Mus musculus adult male testis cDNA, RIKEN full-length enriched library, clone:4930481F22 product:H

[Q61055\\_MOUSE](#) Mass: 44447 Score: 37 Expect: 13 Queries matched: 3  
 Protein tyrosine kinase (Fragment).- Mus musculus (Mouse).

[CAC51130](#) Mass: 9540 Score: 35 Expect: 24 Queries matched: 2  
 Sequence 21 from Patent W00149714 (Fragment).- Mus musculus (Mouse).

[CAA80012](#) Mass: 13869 Score: 34 Expect: 33 Queries matched: 2  
 IMMUNOGLOBULIN VARIABLE REGION (FRAGMENT).- Mus musculus domesticus (western European house mouse).

[Q9QXE6\\_MOUSE](#) Mass: 13455 Score: 33 Expect: 36 Queries matched: 2  
 Malonyl-CoA decarboxylase.- Mus musculus (Mouse).

[Q5R1H0\\_MOUSE](#) Mass: 12634 Score: 33 Expect: 41 Queries matched: 2  
 TRAV13D-1 (Fragment).- Mus musculus (Mouse).

[Q8R1V0\\_MOUSE](#) Mass: 66253 Score: 32 Expect: 45 Queries matched: 3  
 Mus musculus adult male hippocampus cDNA, RIKEN full-length enriched library, clone:C630028L02 prod

[Q8C801\\_MOUSE](#) Mass: 20175 Score: 31 Expect: 66 Queries matched: 2  
 Mus musculus 0 day neonate cerebellum cDNA, RIKEN full-length enriched library, clone:C230071H18 pr

[BAC36903](#) Mass: 19670 Score: 29 Expect: 85 Queries matched: 2  
 AK077617 NID: - Mus musculus

[Q8BX31\\_MOUSE](#) Mass: 29986 Score: 27 Expect: 1.5e+002 Queries matched: 2  
 Mus musculus ES cells cDNA, RIKEN full-length enriched library, clone:C33006M16 product:similar to

[Q99KP8\\_MOUSE](#) Mass: 21354 Score: 27 Expect: 1.5e+002 Queries matched: 2  
 Tpd52 protein.- Mus musculus (Mouse).

[Q8B6K7\\_MOUSE](#) Mass: 119756 Score: 27 Expect: 1.6e+002 Queries matched: 3  
 RTN4 (Reticulon 4).- Mus musculus (Mouse).

[Q8C1M4\\_MOUSE](#) Mass: 25235 Score: 26 Expect: 1.9e+002 Queries matched: 2  
 Mus musculus adult male tongue cDNA, RIKEN full-length enriched library, clone:2310075G14 product:T

[S54354](#) Mass: 110751 Score: 26 Expect: 1.9e+002 Queries matched: 3  
 inter-alpha-inhibitor H2 chain - mouse

[Q9R1Q6\\_MOUSE](#) Mass: 29599 Score: 26 Expect: 1.9e+002 Queries matched: 2  
 Clast1 (LR8 protein) (Mus musculus 10 day old male pancreas cDNA, RIKEN full-length enriched librar

[Q9WU52\\_MOUSE](#) Mass: 29575 Score: 26 Expect: 1.9e+002 Queries matched: 2  
 LR8.- Mus musculus (Mouse).

[Q8K016\\_MOUSE](#) Mass: 110769 Score: 26 Expect: 2e+002 Queries matched: 3  
 Inter-alpha trypsin inhibitor, heavy chain 2.- Mus musculus (Mouse).

[Q9D1B8\\_MOUSE](#) Mass: 21310 Score: 26 Expect: 2e+002 Queries matched: 2  
 Mus musculus 18-day embryo whole body cDNA, RIKEN full-length enriched library, clone:1110015M06 pr

[BAB24225](#) Mass: 21490 Score: 26 Expect: 2e+002 Queries matched: 2  
 AK005762 NID: - Mus musculus

[AAD23879](#) Mass: 21391 Score: 26 Expect: 2e+002 Queries matched: 2  
 AF130367 NID: - Mus musculus

[BAC32928](#) Mass: 27832 Score: 26 Expect: 2.1e+002 Queries matched: 2

AK046964 NID: - Mus musculus

[Q8BGM9\\_MOUSE](#) Mass: 132219 Score: 25 Expect: 2.1e+002 Queries matched: 3  
RTN4 (Reticulon 4). - Mus musculus (Mouse).

[Q8K368\\_MOUSE](#) Mass: 132297 Score: 25 Expect: 2.1e+002 Queries matched: 3  
Nogo-A. - Mus musculus (Mouse).

[Q8OWG1\\_MOUSE](#) Mass: 30111 Score: 25 Expect: 2.3e+002 Queries matched: 2  
Kcnh2 protein (Fragment). - Mus musculus (Mouse).

[Q6P227\\_MOUSE](#) Mass: 26226 Score: 25 Expect: 2.4e+002 Queries matched: 2  
Transmembrane trafficking protein. - Mus musculus (Mouse).

[Q9D1D4\\_MOUSE](#) Mass: 26223 Score: 25 Expect: 2.4e+002 Queries matched: 2  
Mus musculus 18-day embryo whole body cDNA, RIKEN full-length enriched library, clone:1110014C03 pr

[A39529](#) Mass: 105763 Score: 24 Expect: 2.9e+002 Queries matched: 3  
cadherin-associated protein, 102K - mouse

[Q6NV50\\_MOUSE](#) Mass: 105766 Score: 24 Expect: 2.9e+002 Queries matched: 3  
Catenin alpha 1. - Mus musculus (Mouse).

[Q8BMD3\\_MOUSE](#) Mass: 37085 Score: 24 Expect: 2.9e+002 Queries matched: 2  
Mus musculus 12 days embryo male wolffian duct includes surrounding region cDNA, RIKEN full-length

[Q8BML7\\_MOUSE](#) Mass: 37040 Score: 24 Expect: 2.9e+002 Queries matched: 2  
Mus musculus adult male small intestine cDNA, RIKEN full-length enriched library, clone:2010200121

[AAH03432](#) Mass: 37129 Score: 24 Expect: 2.9e+002 Queries matched: 2  
BC003432 NID: - Mus musculus

[Q99K20\\_MOUSE](#) Mass: 36524 Score: 24 Expect: 2.9e+002 Queries matched: 2  
Ldh1 protein (Fragment). - Mus musculus (Mouse).

[LDHA\\_MOUSE](#) Mass: 38523 Score: 24 Expect: 3.1e+002 Queries matched: 2  
L-lactate dehydrogenase A chain (EC 1.1.1.27) (LDH-A) (LDH muscle subunit) (LDH-M). - Mus musculus (

[Q9CX58\\_MOUSE](#) Mass: 30640 Score: 24 Expect: 3.1e+002 Queries matched: 2  
Mus musculus 12 days embryo male wolffian duct includes surrounding region cDNA, RIKEN full-length

[DEMSLM](#) Mass: 38653 Score: 24 Expect: 3.2e+002 Queries matched: 2  
L-lactate dehydrogenase (EC 1.1.1.27) chain M - mouse

[Q5U267\\_XENLA](#) Mass: 38654 Score: 24 Expect: 3.2e+002 Queries matched: 2  
Hypothetical protein. - Xenopus laevis (African clawed frog).

[Q9GUL1\\_MOUSE](#) Mass: 35438 Score: 23 Expect: 3.4e+002 Queries matched: 2  
Mus musculus adult male testis cDNA, RIKEN full-length enriched library, clone:4930473A06 product:h

[Q922A0\\_MOUSE](#) Mass: 38701 Score: 23 Expect: 3.4e+002 Queries matched: 2  
Eno2 protein (Fragment). - Mus musculus (Mouse).

[Q5XF89\\_MOUSE](#) Mass: 144127 Score: 23 Expect: 3.5e+002 Queries matched: 3  
Type V P-type ATPase isoform 3. - Mus musculus (Mouse).

[Q8BW60\\_MOUSE](#) Mass: 45802 Score: 23 Expect: 3.8e+002 Queries matched: 2  
Mus musculus 2 days pregnant adult female oviduct cDNA, RIKEN full-length enriched library, clone:

[Q99KE9\\_MOUSE](#) Mass: 51277 Score: 23 Expect: 3.9e+002 Queries matched: 2  
Nasp protein (Mus musculus 2 days neonate thymus thymic cells cDNA, RIKEN full-length enriched libr

[AAH19812](#) Mass: 39222 Score: 23 Expect: 3.9e+002 Queries matched: 2  
BC019812 NID: - Mus musculus

[Q8CBE4\\_MOUSE](#) Mass: 48620 Score: 23 Expect: 4.1e+002 Queries matched: 2  
Mus musculus 16 days neonate cerebellum cDNA, RIKEN full-length enriched library, clone:9630044P12

[AAB60876](#) Mass: 48634 Score: 23 Expect: 4.1e+002 Queries matched: 2  
AF001871 NID: - Mus musculus

[Q9CYR7\\_MOUSE](#) Mass: 34740 Score: 22 Expect: 4.3e+002 Queries matched: 2  
Mus musculus 10, 11 days embryo whole body cDNA, RIKEN full-length enriched library, clone:2810472M

## Search Parameters

Type of search : Peptide Mass Fingerprint  
 Enzyme : Trypsin  
 Fixed modifications : Carbamidomethyl (C), Dihydro-Imidazol (K)  
 Variable modifications : Oxidation (M)  
 Mass values : Monoisotopic  
 Protein Mass : Unrestricted  
 Peptide Mass Tolerance : ± 0.5 Da  
 Peptide Charge State : 1+  
 Max Missed Cleavages : 1  
 Number of queries : 4

Mascot: <http://www.matrixscience.com/>
