# Supplementary material for: Excess hydrogen sulfide and polysulfides production underlies a schizophrenia pathophysiology
Source: PubMed Central journal article supplement (PMC6895609; doi:10.15252/emmm.201910695), 2019-10-28
Supplement: EMMM-11-e10695-s004.pdf [file EMMM-11-e10695-s004.pdf]

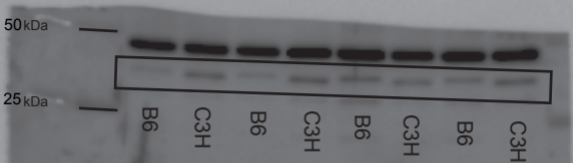

**Fig.3A Frontal Cortex/Mpst-C**

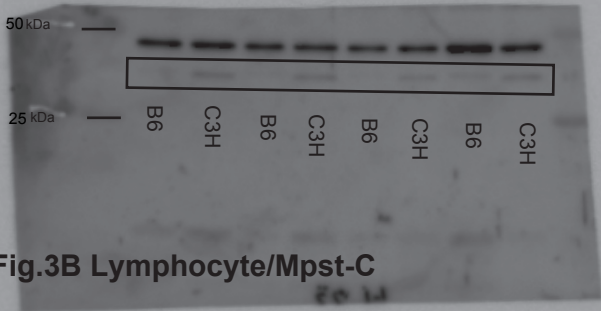

**Fig.3B Lymphocyte/Mpst-C**
