# Supplementary material for: Excess hydrogen sulfide and polysulfides production underlies a schizophrenia pathophysiology
Source: PubMed Central journal article supplement (PMC6895609; doi:10.15252/emmm.201910695), 2019-10-28

# WB image for Fig. 7A: MPST+GAPDH

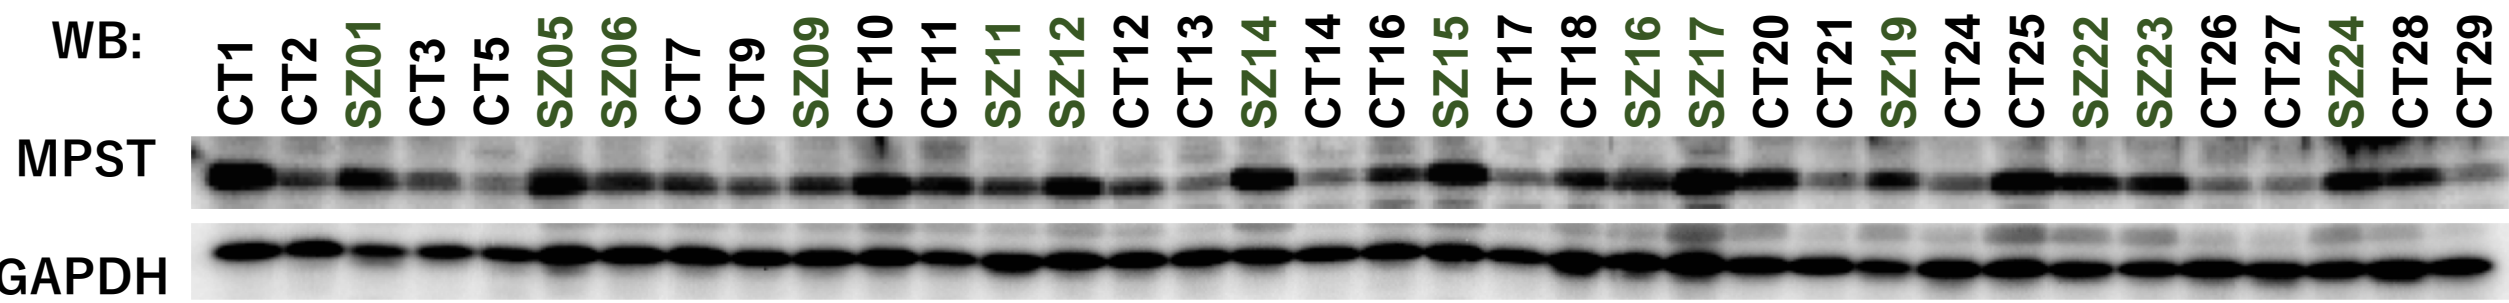

CT: Control  
SZ: Schizophrenia

# WB: anti-MPST

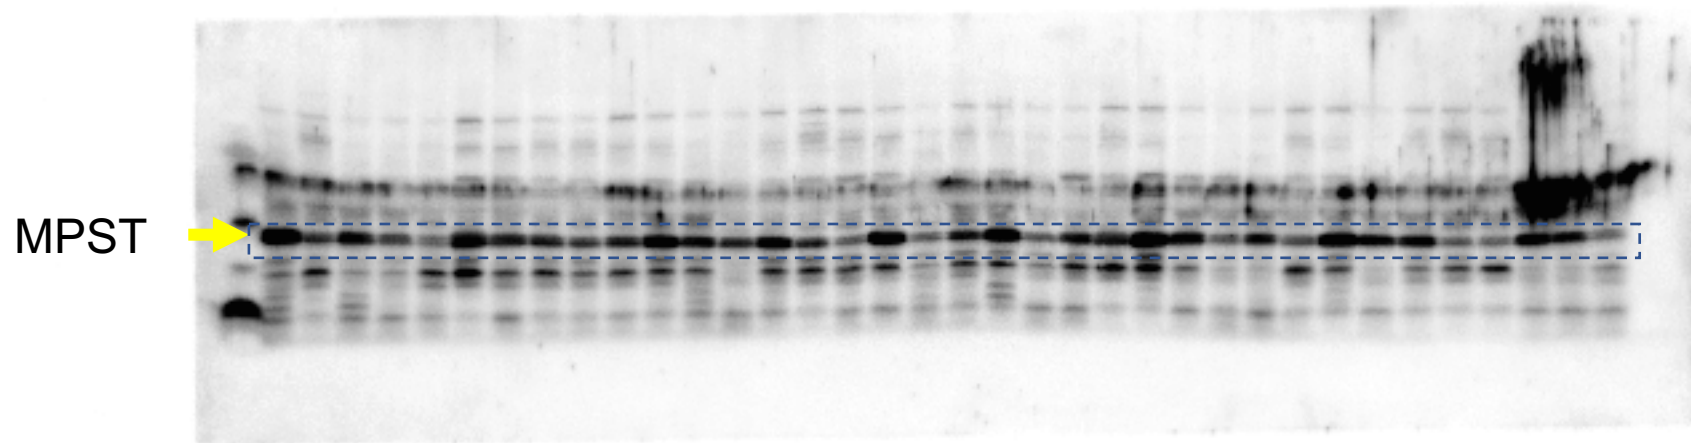

# WB: anti-GAPDH

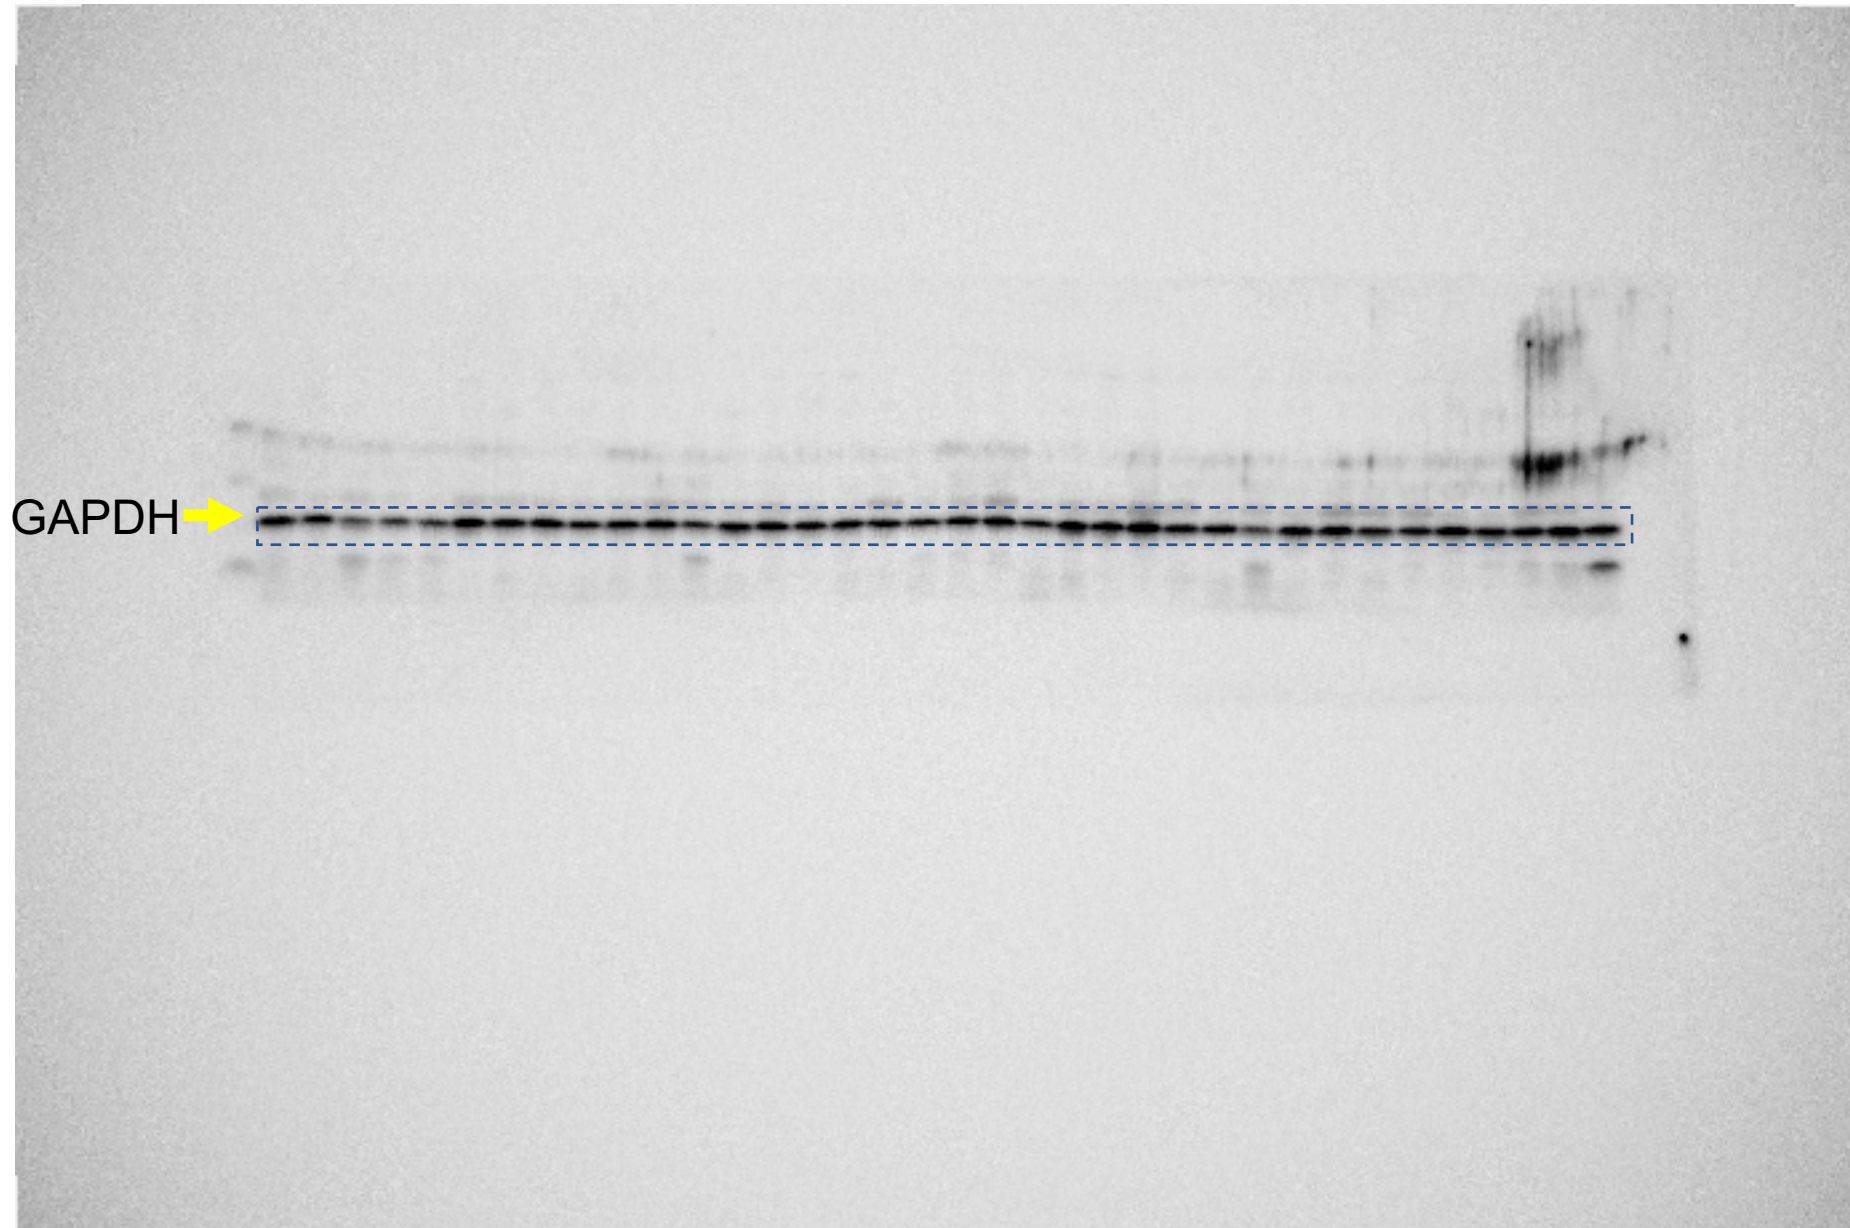

Supplement: EMMM-11-e10695-s005.pdf [file EMMM-11-e10695-s005.pdf]
